# Supplementary material for: Regulation of canonical Wnt signalling by the ciliopathy protein MKS1 and the E2 ubiquitin-conjugating enzyme UBE2E1
Source: eLife journal article supplement (doi:10.7554/elife.57593), 2022-02-15

Figure 1a P-b-cat and b-catenin

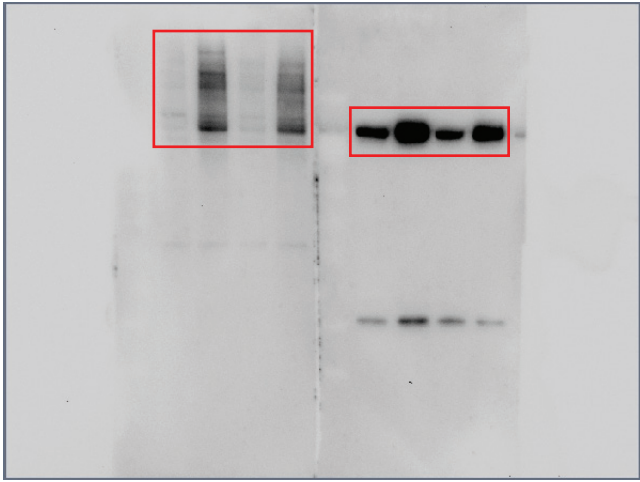

Figure 1a b-actin

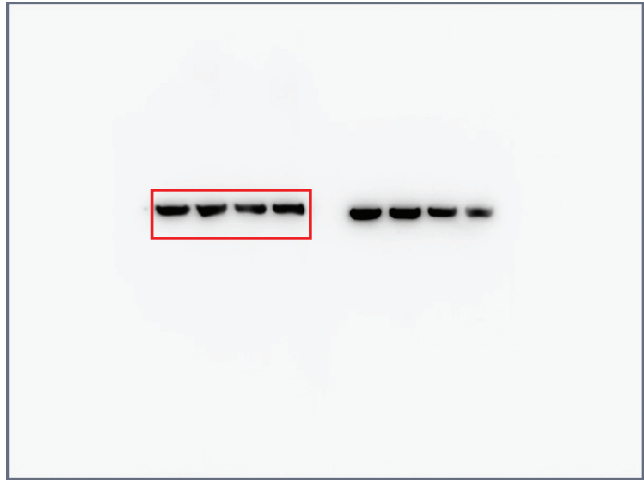

Figure 1c 20Sa7

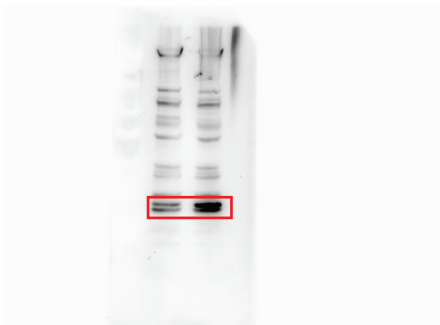

Figure 1c b-actin

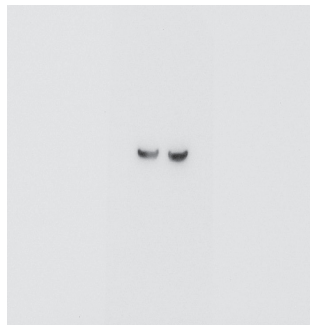

Supplement: fig1-data1 [file elife-57593-fig1-data1-v2.pdf]
