# Supplementary material for: Regulation of canonical Wnt signalling by the ciliopathy protein MKS1 and the E2 ubiquitin-conjugating enzyme UBE2E1
Source: eLife journal article supplement (doi:10.7554/elife.57593), 2022-02-15

Figure 1 fs 1a

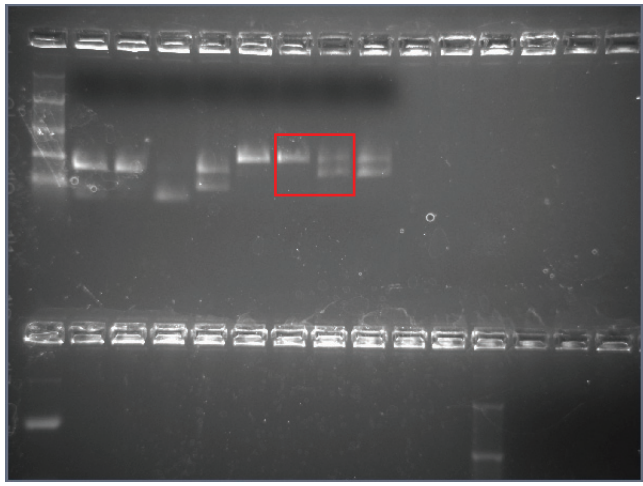

Figure 1 fs 1a

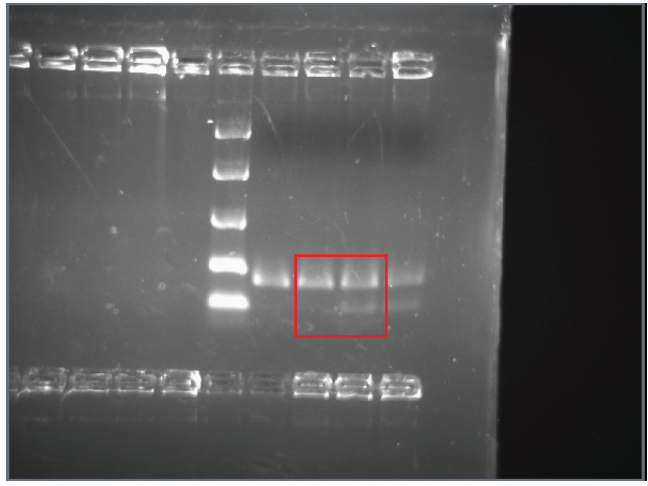

Figure 1 fs 1b MKS1

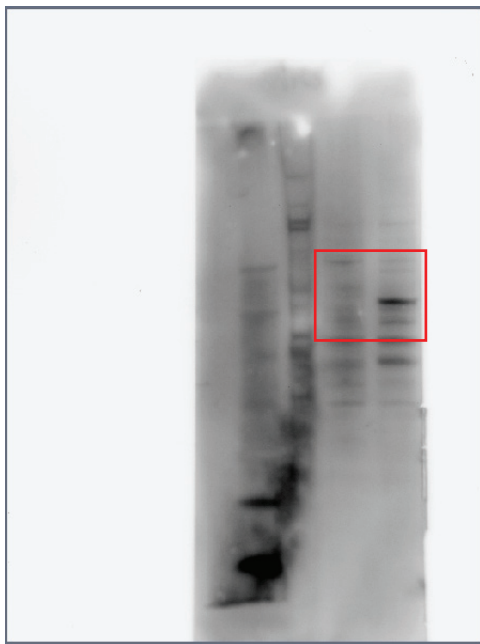

Figure 1 fs 1b b-actin

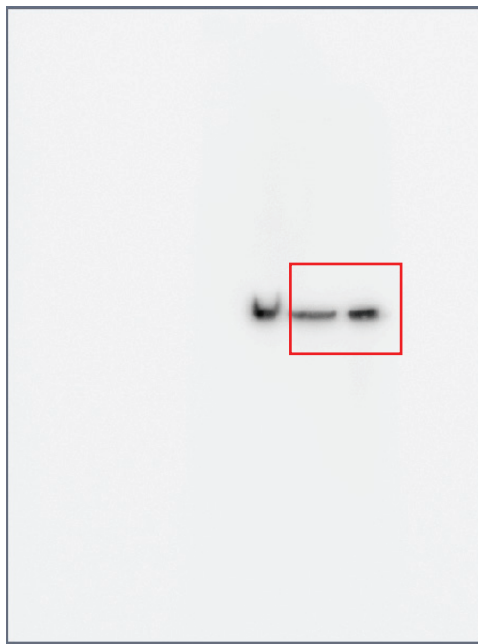

Supplement: fig1-figsupp1-data1 [file elife-57593-fig1-figsupp1-data1-v2.pdf]
