# Supplementary material for: Regulation of canonical Wnt signalling by the ciliopathy protein MKS1 and the E2 ubiquitin-conjugating enzyme UBE2E1
Source: eLife journal article supplement (doi:10.7554/elife.57593), 2022-02-15

Figure 6a

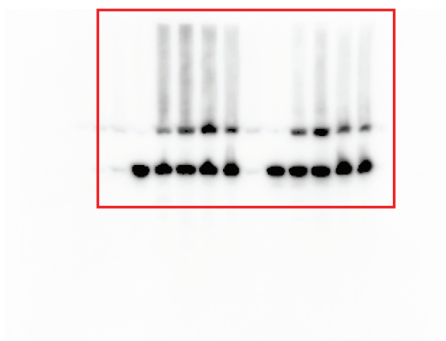

Figure 6b

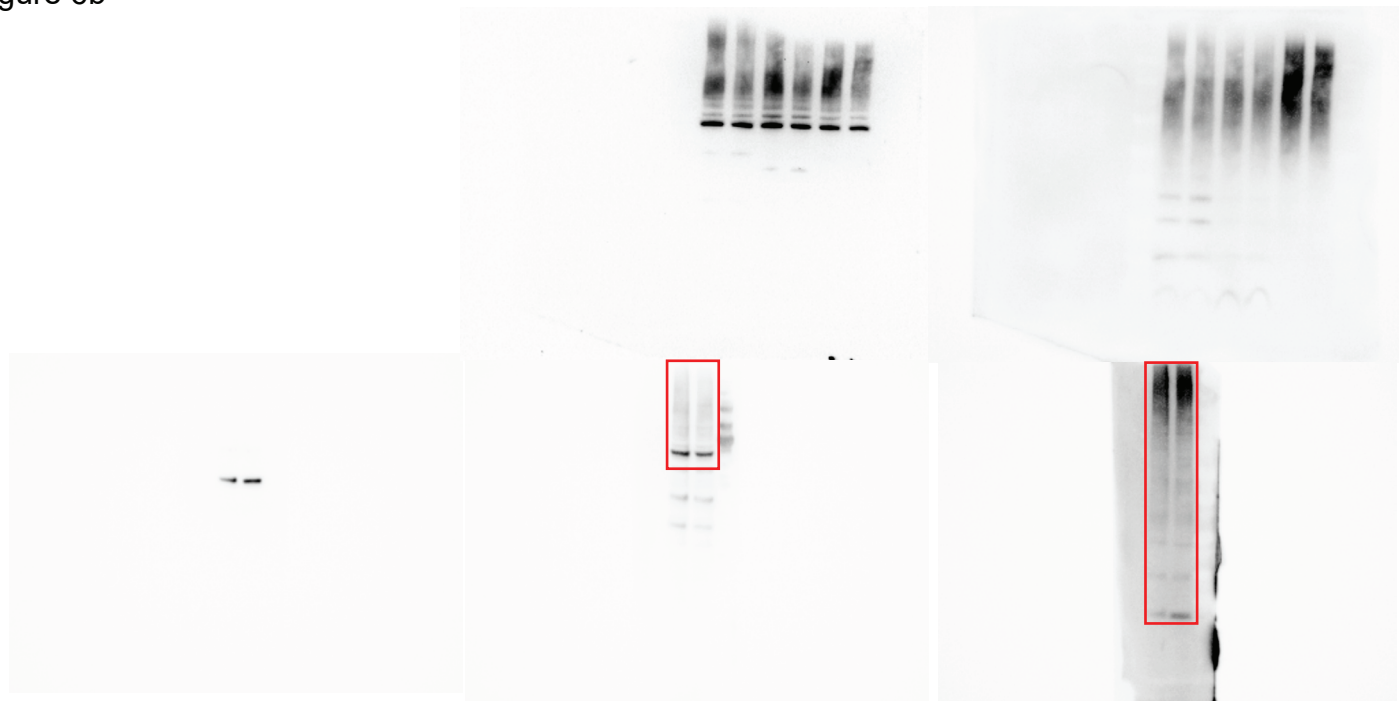

Figure 6c

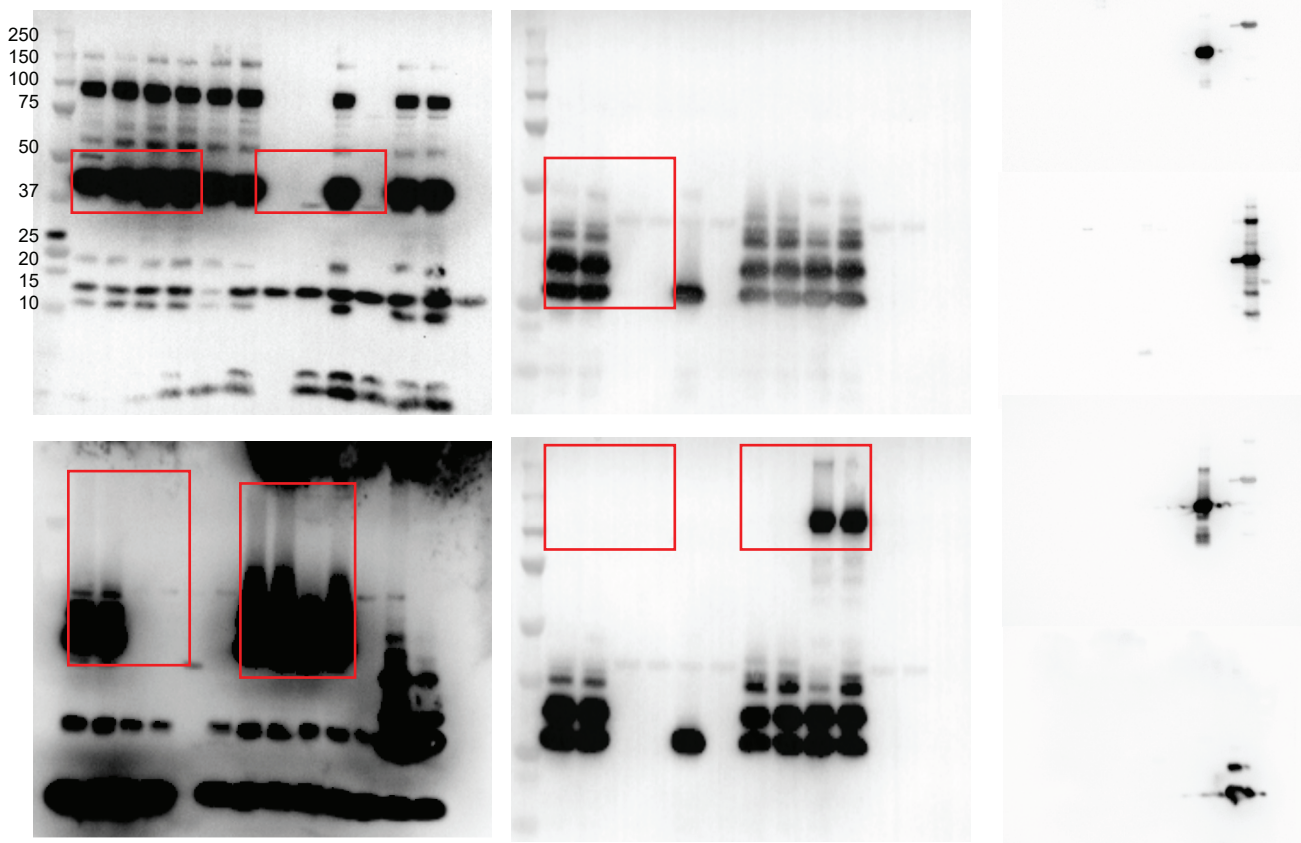

Supplement: fig6-data1 [file elife-57593-fig6-data1-v2.pdf]
