# Supplementary material for: Regulation of canonical Wnt signalling by the ciliopathy protein MKS1 and the E2 ubiquitin-conjugating enzyme UBE2E1
Source: eLife. 2022 Feb 16;11:e57593. doi: 10.7554/eLife.57593 (PMC8880992; doi:10.7554/eLife.57593)
Supplement: Figure 4—source data 2. [file elife-57593-fig4-data2.xlsx]

## Sheet: Suppl Dataset 1
						shScr control			shUbe2e1 knockdown							peptide counts ratio shUbe2e1:siScr				GO term: biological process
Bio View:Identified Proteins (774/801)	Gene	Accession number	Molecular weight		BSA1	proliferating	cilliated	ciliary resorption	proliferating	cilliated	ciliary resorption	BSA2	chisq test			proliferating	ciliated	ciliary resorption		cell-cell adhesion	RNA splicing	vesicle-mediated transport	ubiquitin-dependent proteostasis	microtubule-based process	actin cytoskeleton
															t-test	0.00540959	9.80362e-16	3.38514e-23
															mean	1.0109	0.881231	0.696087
															SD	0.373648	0.351829	0.286239
Stress-70 protein, mitochondrial OS=Mus musculus GN=Hspa9 PE=1 SV=3	Hspa9	GRP75_MOUSE	73 kDa			47	48	49	50	41	48	3	0.539903			1.06383	0.854167	0.979592		FALSE	FALSE	FALSE	FALSE	FALSE	FALSE
Heat shock cognate 71 kDa protein OS=Mus musculus GN=Hspa8 PE=1 SV=1	Hspa8	HSP7C_MOUSE	71 kDa			40	39	43	43	40	39	9	0.732445			1.075	1.02564	0.906977		FALSE	TRUE	FALSE	FALSE	FALSE	FALSE
Fibronectin OS=Mus musculus GN=Fn1 PE=1 SV=4	Fn1	FINC_MOUSE	273 kDa			50	58	49	50	41	59		0.0298435			1	0.706897	1.20408		FALSE	FALSE	FALSE	FALSE	FALSE	FALSE
Endoplasmic reticulum chaperone BiP OS=Mus musculus OX=10090 GN=Hspa5 PE=1 SV=3	Hspa5	BIP_MOUSE	?			38	40	37	37	32	33	2	0.35723			0.973684	0.8	0.891892		FALSE	FALSE	FALSE	FALSE	FALSE	FALSE
Filamin-A OS=Mus musculus GN=Flna PE=1 SV=5	Flna	FLNA_MOUSE	281 kDa			63	65	58	64	52	35		0.00282773			1.01587	0.8	0.603448		FALSE	FALSE	FALSE	FALSE	FALSE	TRUE
Heat shock protein HSP 90-beta OS=Mus musculus GN=Hsp90ab1 PE=1 SV=3	Hsp90ab1	HS90B_MOUSE	83 kDa			38	35	37	35	29	29		0.223673			0.921053	0.828571	0.783784		FALSE	FALSE	FALSE	FALSE	FALSE	FALSE
Actin, cytoplasmic 1 OS=Mus musculus GN=Actb PE=1 SV=1	Actb	ACTB_MOUSE	42 kDa		3	24	19	20	21	22	19	5	0.638048			0.875	1.15789	0.95		FALSE	FALSE	FALSE	FALSE	FALSE	FALSE
Glyceraldehyde-3-phosphate dehydrogenase OS=Mus musculus GN=Gapdh PE=1 SV=2	Gapdh	G3P_MOUSE	36 kDa			16	13	15	16	16	14		0.684212			1	1.23077	0.933333		FALSE	FALSE	FALSE	FALSE	FALSE	FALSE
Heat shock 70 kDa protein 1A OS=Mus musculus GN=Hspa1a PE=1 SV=2	Hspa1a	HS71A_MOUSE	70 kDa			24	26	23	24	21	22		0.605011			1	0.807692	0.956522		TRUE	FALSE	FALSE	FALSE	FALSE	FALSE
Pyruvate kinase PKM OS=Mus musculus GN=Pkm PE=1 SV=4	Pkm	KPYM_MOUSE	58 kDa			28	25	29	29	22	26		0.702556			1.03571	0.88	0.896552		FALSE	FALSE	FALSE	FALSE	FALSE	FALSE
Myosin-9 OS=Mus musculus GN=Myh9 PE=1 SV=4	Myh9	MYH9_MOUSE	226 kDa			58	28	31	26	22	8		1.51889e-08			0.448276	0.785714	0.258065		FALSE	FALSE	FALSE	FALSE	FALSE	FALSE
Fatty acid synthase OS=Mus musculus GN=Fasn PE=1 SV=2	Fasn	FAS_MOUSE	272 kDa			30	28	31	32	24	14		0.00664646			1.06667	0.857143	0.451613		FALSE	FALSE	FALSE	FALSE	FALSE	FALSE
Elongation factor 2 OS=Mus musculus GN=Eef2 PE=1 SV=2	Eef2	EF2_MOUSE	95 kDa			27	24	30	26	21	17		0.0486704			0.962963	0.875	0.566667		FALSE	FALSE	FALSE	FALSE	FALSE	FALSE
Filamin-B OS=Mus musculus GN=Flnb PE=1 SV=3	Flnb	FLNB_MOUSE	278 kDa			39	24	37	36	18	13		0.000175273			0.923077	0.75	0.351351		TRUE	FALSE	FALSE	FALSE	FALSE	TRUE
Tubulin beta-5 chain OS=Mus musculus GN=Tubb5 PE=1 SV=1	Tubb5	TBB5_MOUSE	50 kDa		3	16	14	16	15	15	14		0.825336			0.9375	1.07143	0.875		FALSE	FALSE	FALSE	FALSE	TRUE	FALSE
Elongation factor 1-alpha 1 OS=Mus musculus GN=Eef1a1 PE=1 SV=3	Eef1a1	EF1A1_MOUSE	50 kDa		3	17	15	16	15	11	14	4	0.460252			0.882353	0.733333	0.875		FALSE	FALSE	FALSE	FALSE	FALSE	FALSE
ATP-citrate synthase OS=Mus musculus GN=Acly PE=1 SV=1	Acly	ACLY_MOUSE	120 kDa			27	22	28	21	18	13		0.00642114			0.777778	0.818182	0.464286		FALSE	FALSE	FALSE	FALSE	FALSE	FALSE
Tubulin alpha-1B chain OS=Mus musculus GN=Tuba1b PE=1 SV=2	Tuba1b	TBA1B_MOUSE	50 kDa			15	14	15	16	10	12		0.404638			1.06667	0.714286	0.8		FALSE	FALSE	FALSE	FALSE	TRUE	FALSE
Heat shock protein HSP 90-alpha OS=Mus musculus GN=Hsp90aa1 PE=1 SV=4	Hsp90aa1	HS90A_MOUSE	85 kDa			22	18	18	18	15	11		0.138796			0.818182	0.833333	0.611111		FALSE	FALSE	FALSE	FALSE	FALSE	FALSE
Clathrin heavy chain 1 OS=Mus musculus GN=Cltc PE=1 SV=3	Cltc	CLH1_MOUSE	192 kDa			22	18	20	23	13	14		0.198459			1.04545	0.722222	0.7		FALSE	FALSE	TRUE	FALSE	FALSE	FALSE
ATP synthase subunit alpha, mitochondrial OS=Mus musculus GN=Atp5a1 PE=1 SV=1	Atp5a1	ATPA_MOUSE	60 kDa			15	17	17	17	16	13		0.530819			1.13333	0.941176	0.764706		FALSE	FALSE	FALSE	FALSE	FALSE	FALSE
Elongation factor 1-gamma OS=Mus musculus GN=Eef1g PE=1 SV=3	Eef1g	EF1G_MOUSE	50 kDa			13	14	13	12	12	13		0.834169			0.923077	0.857143	1		TRUE	FALSE	FALSE	FALSE	FALSE	FALSE
Endoplasmin OS=Mus musculus GN=Hsp90b1 PE=1 SV=2	Hsp90b1	ENPL_MOUSE	92 kDa			20	16	16	20	11	10		0.148637			1	0.6875	0.625		FALSE	FALSE	FALSE	FALSE	FALSE	FALSE
D-3-phosphoglycerate dehydrogenase OS=Mus musculus GN=Phgdh PE=1 SV=3	Phgdh	SERA_MOUSE	57 kDa			15	13	12	12	9	11		0.384024			0.8	0.692308	0.916667		FALSE	FALSE	FALSE	FALSE	FALSE	FALSE
14-3-3 protein zeta/delta OS=Mus musculus GN=Ywhaz PE=1 SV=1	Ywhaz	1433Z_MOUSE	28 kDa			10	10	11	8	9	9		0.649327			0.8	0.9	0.818182		TRUE	FALSE	FALSE	FALSE	FALSE	FALSE
Fructose-bisphosphate aldolase A OS=Mus musculus GN=Aldoa PE=1 SV=2	Aldoa	ALDOA_MOUSE	39 kDa			17	16	17	16	12	11		0.204286			0.941176	0.75	0.647059		TRUE	FALSE	FALSE	FALSE	FALSE	FALSE
Transitional endoplasmic reticulum ATPase OS=Mus musculus GN=Vcp PE=1 SV=4	Vcp	TERA_MOUSE	89 kDa			20	14	16	22	12	7		0.0624052			1.1	0.857143	0.4375		FALSE	FALSE	FALSE	TRUE	FALSE	FALSE
60 kDa heat shock protein, mitochondrial OS=Mus musculus GN=Hspd1 PE=1 SV=1	Hspd1	CH60_MOUSE	61 kDa			20	13	16	22	10	11		0.293052			1.1	0.769231	0.6875		FALSE	FALSE	FALSE	FALSE	FALSE	FALSE
Glutathione S-transferase P 1 OS=Mus musculus GN=Gstp1 PE=1 SV=2	Gstp1	GSTP1_MOUSE	24 kDa			11	11	10	11	10	10		0.955563			1	0.909091	1		FALSE	FALSE	FALSE	FALSE	FALSE	FALSE
Alpha-enolase OS=Mus musculus GN=Eno1 PE=1 SV=3	Eno1	ENOA_MOUSE	47 kDa		2	17	11	11	16	8	7		0.311681			0.941176	0.727273	0.636364		TRUE	FALSE	FALSE	FALSE	FALSE	FALSE
Eukaryotic initiation factor 4A-I OS=Mus musculus GN=Eif4a1 PE=1 SV=1	Eif4a1	IF4A1_MOUSE	46 kDa			12	8	13	12	6	6		0.11829			1	0.75	0.461538		FALSE	FALSE	FALSE	FALSE	FALSE	FALSE
Cytoplasmic dynein 1 heavy chain 1 OS=Mus musculus GN=Dync1h1 PE=1 SV=2	Dync1h1	DYHC1_MOUSE	532 kDa			27	16	20	22	2	8		3.76204e-05			0.814815	0.125	0.4		FALSE	FALSE	FALSE	FALSE	FALSE	FALSE
T-complex protein 1 subunit epsilon OS=Mus musculus GN=Cct5 PE=1 SV=1	Cct5	TCPE_MOUSE	60 kDa			12	16	16	18	14	13		0.148637			1.5	0.875	0.8125		FALSE	FALSE	FALSE	FALSE	FALSE	FALSE
T-complex protein 1 subunit alpha OS=Mus musculus GN=Tcp1 PE=1 SV=3	Tcp1	TCPA_MOUSE	60 kDa			14	16	15	12	11	8		0.0775029			0.857143	0.6875	0.533333		FALSE	FALSE	FALSE	FALSE	FALSE	FALSE
Bifunctional glutamate/proline--tRNA ligase OS=Mus musculus GN=Eprs PE=1 SV=4	Eprs	SYEP_MOUSE	170 kDa			21	15	20	14	9	7		0.00137175			0.666667	0.6	0.35		FALSE	FALSE	FALSE	FALSE	FALSE	FALSE
14-3-3 protein epsilon OS=Mus musculus GN=Ywhae PE=1 SV=1	Ywhae	1433E_MOUSE	29 kDa			15	13	11	14	9	5		0.101766			0.933333	0.692308	0.454545		FALSE	FALSE	FALSE	FALSE	FALSE	FALSE
26S proteasome non-ATPase regulatory subunit 2 OS=Mus musculus GN=Psmd2 PE=1 SV=1	Psmd2	PSMD2_MOUSE	100 kDa			11	11	12	13	11	5		0.108231			1.18182	1	0.416667		FALSE	FALSE	FALSE	FALSE	FALSE	FALSE
L-lactate dehydrogenase A chain OS=Mus musculus GN=Ldha PE=1 SV=3	Ldha	LDHA_MOUSE	36 kDa			10	9	10	10	7	7		0.510573			1	0.777778	0.7		TRUE	FALSE	FALSE	FALSE	FALSE	FALSE
Proliferating cell nuclear antigen OS=Mus musculus GN=Pcna PE=1 SV=2	Pcna	PCNA_MOUSE	29 kDa			8	6	8	9	7	4		0.317959			1.125	1.16667	0.5		FALSE	FALSE	FALSE	FALSE	FALSE	FALSE
T-complex protein 1 subunit theta OS=Mus musculus GN=Cct8 PE=1 SV=3	Cct8	TCPQ_MOUSE	60 kDa			11	11	16	16	10	6		0.0134764			1.45455	0.909091	0.375		FALSE	FALSE	FALSE	FALSE	FALSE	FALSE
ATP synthase subunit beta, mitochondrial OS=Mus musculus GN=Atp5b PE=1 SV=2	Atp5b	ATPB_MOUSE	56 kDa			15	10	9	11	9	5		0.229415			0.733333	0.9	0.555556		FALSE	FALSE	FALSE	FALSE	FALSE	FALSE
Alpha-actinin-1 OS=Mus musculus GN=Actn1 PE=1 SV=1	Actn1	ACTN1_MOUSE	103 kDa			15	11	7	17	5	2		0.0285696			1.13333	0.454545	0.285714		FALSE	FALSE	FALSE	FALSE	FALSE	FALSE
Cytoplasmic dynein 1 intermediate chain 2 OS=Mus musculus GN=Dync1i2 PE=1 SV=1	Dync1i2	DC1I2_MOUSE	68 kDa			7	8	9	7	6	10		0.736714			1	0.75	1.11111		FALSE	FALSE	FALSE	FALSE	FALSE	FALSE
Filamin-C OS=Mus musculus GN=Flnc PE=1 SV=3	Flnc	FLNC_MOUSE	291 kDa			12	5	11	18	4	5		0.0393066			1.5	0.8	0.454545		FALSE	FALSE	FALSE	FALSE	FALSE	FALSE
E3 ubiquitin-protein ligase RNF213 OS=Mus musculus GN=Rnf213 PE=2 SV=1	Rnf213	RN213_MOUSE	584 kDa			13	9	18	14		2		0.0007852			1.07692		0.111111		FALSE	FALSE	FALSE	TRUE	FALSE	FALSE
Nucleophosmin OS=Mus musculus GN=Npm1 PE=1 SV=1	Npm1	NPM_MOUSE	33 kDa			6	6	6	9	6	5		0.434598			1.5	1	0.833333		FALSE	FALSE	FALSE	FALSE	FALSE	FALSE
Peroxiredoxin-1 OS=Mus musculus GN=Prdx1 PE=1 SV=1	Prdx1	PRDX1_MOUSE	22 kDa			10	8	8	9	8	5		0.541994			0.9	1	0.625		TRUE	FALSE	FALSE	FALSE	FALSE	FALSE
Receptor of activated protein C kinase 1 OS=Mus musculus OX=10090 GN=Rack1 PE=1 SV=3	Rack1	RACK1_MOUSE	?			11	11	10	4	5	4		0.00346988			0.363636	0.454545	0.4		FALSE	FALSE	FALSE	FALSE	FALSE	FALSE
DNA replication licensing factor MCM6 OS=Mus musculus GN=Mcm6 PE=1 SV=1	Mcm6	MCM6_MOUSE	93 kDa			13	8	14	11	6	7		0.116037			0.846154	0.75	0.5		FALSE	FALSE	FALSE	FALSE	FALSE	FALSE
T-complex protein 1 subunit beta OS=Mus musculus GN=Cct2 PE=1 SV=4	Cct2	TCPB_MOUSE	57 kDa			11	7	11	11	5	4		0.0810259			1	0.714286	0.363636		FALSE	FALSE	FALSE	FALSE	FALSE	FALSE
Triosephosphate isomerase OS=Mus musculus GN=Tpi1 PE=1 SV=4	Tpi1	TPIS_MOUSE	32 kDa			6	8	8	10	7	5		0.141093			1.66667	0.875	0.625		FALSE	FALSE	FALSE	FALSE	FALSE	FALSE
Eukaryotic translation initiation factor 4 gamma 1 OS=Mus musculus GN=Eif4g1 PE=1 SV=1	Eif4g1	IF4G1_MOUSE	176 kDa			17	6	12	8	5	5		0.0110276			0.470588	0.833333	0.416667		TRUE	FALSE	FALSE	FALSE	FALSE	FALSE
Peptidyl-prolyl cis-trans isomerase A OS=Mus musculus GN=Ppia PE=1 SV=2	Ppia	PPIA_MOUSE	18 kDa			7	9	6	9	8	3		0.33579			1.28571	0.888889	0.5		FALSE	FALSE	FALSE	FALSE	FALSE	FALSE
Sodium/potassium-transporting ATPase subunit alpha-1 OS=Mus musculus GN=Atp1a1 PE=1 SV=1	Atp1a1	AT1A1_MOUSE	113 kDa			11	11	11	10	6	4		0.0330713			0.909091	0.545455	0.363636		FALSE	FALSE	FALSE	FALSE	FALSE	FALSE
40S ribosomal protein S3 OS=Mus musculus GN=Rps3 PE=1 SV=1	Rps3	RS3_MOUSE	27 kDa			8	8	10	9	8	7		0.598996			1.125	1	0.7		FALSE	FALSE	FALSE	FALSE	FALSE	FALSE
T-complex protein 1 subunit zeta OS=Mus musculus GN=Cct6a PE=1 SV=3	Cct6a	TCPZ_MOUSE	58 kDa			12	7	9	12	8	6		0.564718			1	1.14286	0.666667		FALSE	FALSE	FALSE	FALSE	FALSE	FALSE
Heat shock 70 kDa protein 4 OS=Mus musculus GN=Hspa4 PE=1 SV=1	Hspa4	HSP74_MOUSE	94 kDa			10	8	8	9	2	3		0.0210154			0.9	0.25	0.375		FALSE	FALSE	FALSE	FALSE	FALSE	FALSE
Neutral alpha-glucosidase AB OS=Mus musculus GN=Ganab PE=1 SV=1	Ganab	GANAB_MOUSE	107 kDa			12	8	9	15	4	5		0.103945			1.25	0.5	0.555556		FALSE	FALSE	FALSE	FALSE	FALSE	FALSE
T-complex protein 1 subunit eta OS=Mus musculus GN=Cct7 PE=1 SV=1	Cct7	TCPH_MOUSE	60 kDa			8	7	8	10	4	7		0.384675			1.25	0.571429	0.875		FALSE	FALSE	FALSE	FALSE	FALSE	FALSE
Transketolase OS=Mus musculus GN=Tkt PE=1 SV=1	Tkt	TKT_MOUSE	68 kDa			14	9	8	14	7			0.800737			1	0.777778			FALSE	FALSE	FALSE	FALSE	FALSE	FALSE
Ubiquitin-60S ribosomal protein L40 OS=Mus musculus GN=Uba52 PE=1 SV=2	Uba52	RL40_MOUSE	15 kDa			6	5	6	5	6	5		0.765928			0.833333	1.2	0.833333		FALSE	FALSE	FALSE	FALSE	FALSE	FALSE
Annexin A7 OS=Mus musculus GN=Anxa7 PE=2 SV=2	Anxa7	ANXA7_MOUSE	50 kDa			6	12	6	8	11			0.687289			1.33333	0.916667			FALSE	FALSE	FALSE	FALSE	FALSE	FALSE
Calnexin OS=Mus musculus GN=Canx PE=1 SV=1	Canx	CALX_MOUSE	67 kDa			11	8	10	10	2			0.100716			0.909091	0.25			FALSE	FALSE	FALSE	FALSE	FALSE	FALSE
WD repeat-containing protein 1 OS=Mus musculus GN=Wdr1 PE=1 SV=3	Wdr1	WDR1_MOUSE	66 kDa			10	9	8	10	7	4		0.294575			1	0.777778	0.5		FALSE	FALSE	FALSE	FALSE	FALSE	TRUE
Cleavage and polyadenylation specificity factor subunit 7 OS=Mus musculus GN=Cpsf7 PE=1 SV=2	Cpsf7	CPSF7_MOUSE	52 kDa			10	11	9	9	9	10		0.750231			0.9	0.818182	1.11111		FALSE	FALSE	FALSE	FALSE	FALSE	FALSE
E3 ubiquitin-protein ligase DTX3L OS=Mus musculus GN=Dtx3l PE=2 SV=1	Dtx3l	DTX3L_MOUSE	83 kDa			10	7	11	10	4	8		0.349257			1	0.571429	0.727273		FALSE	FALSE	FALSE	FALSE	FALSE	FALSE
Deoxynucleoside triphosphate triphosphohydrolase SAMHD1 OS=Mus musculus GN=Samhd1 PE=1 SV=2	Samhd1	SAMH1_MOUSE	73 kDa			6	6	9	13	4	10		0.0114219			2.16667	0.666667	1.11111		FALSE	FALSE	FALSE	FALSE	FALSE	FALSE
CAD protein OS=Mus musculus GN=Cad PE=2 SV=1	Cad	PYR1_MOUSE	243 kDa			13	5	12	7	3	5		0.0217905			0.538462	0.6	0.416667		FALSE	FALSE	FALSE	FALSE	FALSE	FALSE
Phosphoglycerate kinase 1 OS=Mus musculus GN=Pgk1 PE=1 SV=4	Pgk1	PGK1_MOUSE	45 kDa			12	6	8	10	4	2		0.0639279			0.833333	0.666667	0.25		FALSE	FALSE	FALSE	FALSE	FALSE	FALSE
Talin-1 OS=Mus musculus GN=Tln1 PE=1 SV=2	Tln1	TLN1_MOUSE	270 kDa			11	9	8	10	2	3		0.0131652			0.909091	0.222222	0.375		TRUE	FALSE	FALSE	FALSE	FALSE	FALSE
Cofilin-1 OS=Mus musculus GN=Cfl1 PE=1 SV=3	Cfl1	COF1_MOUSE	19 kDa			10	9	11	9	6			0.57695			0.9	0.666667			FALSE	FALSE	FALSE	FALSE	FALSE	FALSE
Ras GTPase-activating-like protein IQGAP1 OS=Mus musculus GN=Iqgap1 PE=1 SV=2	Iqgap1	IQGA1_MOUSE	189 kDa			8	10	9	7	5			0.269146			0.875	0.5			FALSE	FALSE	FALSE	FALSE	FALSE	FALSE
Caveolin-1 OS=Mus musculus GN=Cav1 PE=1 SV=1	Cav1	CAV1_MOUSE	21 kDa			5	7	5	6	5	5		0.679965			1.2	0.714286	1		FALSE	FALSE	FALSE	FALSE	FALSE	FALSE
Four and a half LIM domains protein 3 OS=Mus musculus GN=Fhl3 PE=1 SV=2	Fhl3	FHL3_MOUSE	32 kDa			6	6	6	5	4	7		0.606531			0.833333	0.666667	1.16667		FALSE	FALSE	FALSE	FALSE	FALSE	TRUE
Profilin-1 OS=Mus musculus GN=Pfn1 PE=1 SV=2	Pfn1	PROF1_MOUSE	15 kDa			8	4	7	7	5	6		0.771878			0.875	1.25	0.857143		FALSE	FALSE	FALSE	FALSE	FALSE	TRUE
DNA replication licensing factor MCM3 OS=Mus musculus GN=Mcm3 PE=1 SV=2	Mcm3	MCM3_MOUSE	92 kDa			8	7	10	7	6	3		0.0754769			0.875	0.857143	0.3		FALSE	FALSE	FALSE	FALSE	FALSE	FALSE
Malate dehydrogenase, mitochondrial OS=Mus musculus GN=Mdh2 PE=1 SV=3	Mdh2	MDHM_MOUSE	36 kDa			10	7	7	11	5	5		0.537176			1.1	0.714286	0.714286		FALSE	FALSE	FALSE	FALSE	FALSE	FALSE
60S ribosomal protein L12 OS=Mus musculus GN=Rpl12 PE=1 SV=2	Rpl12	RL12_MOUSE	18 kDa			7	6	6	9	8	4		0.385821			1.28571	1.33333	0.666667		FALSE	FALSE	FALSE	FALSE	FALSE	FALSE
Poly(rC)-binding protein 1 OS=Mus musculus GN=Pcbp1 PE=1 SV=1	Pcbp1	PCBP1_MOUSE	37 kDa			5	4	5	5	2	4		0.548812			1	0.5	0.8		FALSE	FALSE	FALSE	FALSE	FALSE	FALSE
Meckel syndrome type 1 protein homolog OS=Mus musculus GN=Mks1 PE=1 SV=1	Mks1	MKS1_MOUSE	64 kDa			6	4	7	7	5	8		0.755964			1.16667	1.25	1.14286		FALSE	FALSE	FALSE	FALSE	FALSE	FALSE
Aspartate--tRNA ligase, cytoplasmic OS=Mus musculus GN=Dars PE=2 SV=2	Dars	SYDC_MOUSE	57 kDa			6	6	9	6	5	3		0.124514			1	0.833333	0.333333		FALSE	FALSE	FALSE	FALSE	FALSE	FALSE
T-complex protein 1 subunit delta OS=Mus musculus GN=Cct4 PE=1 SV=3	Cct4	TCPD_MOUSE	58 kDa			9	10	7	10	5	5		0.203667			1.11111	0.5	0.714286		FALSE	FALSE	FALSE	FALSE	FALSE	FALSE
Valine--tRNA ligase OS=Mus musculus GN=Vars PE=2 SV=1	Vars	SYVC_MOUSE	140 kDa			10	8	7	8	5	2		0.0782212			0.8	0.625	0.285714		FALSE	FALSE	FALSE	FALSE	FALSE	FALSE
Eukaryotic translation initiation factor 5A-1 OS=Mus musculus GN=Eif5a PE=1 SV=2	Eif5a	IF5A1_MOUSE	17 kDa			6	6	6	6	5	4		0.659241			1	0.833333	0.666667		FALSE	FALSE	FALSE	FALSE	FALSE	FALSE
Heat shock protein beta-1 OS=Mus musculus GN=Hspb1 PE=1 SV=3	Hspb1	HSPB1_MOUSE	23 kDa			4	6	8	12	5	3		6.46946e-05			3	0.833333	0.375		FALSE	FALSE	FALSE	FALSE	FALSE	FALSE
Peptidyl-prolyl cis-trans isomerase FKBP4 OS=Mus musculus GN=Fkbp4 PE=1 SV=5	Fkbp4	FKBP4_MOUSE	52 kDa			9	8	5	15	4	2		0.0202419			1.66667	0.5	0.4		FALSE	FALSE	FALSE	FALSE	FALSE	FALSE
Aconitate hydratase, mitochondrial OS=Mus musculus GN=Aco2 PE=1 SV=1	Aco2	ACON_MOUSE	85 kDa			12	7	8	6	7	4		0.082085			0.5	1	0.5		FALSE	FALSE	FALSE	FALSE	FALSE	FALSE
Caveolin-2 OS=Mus musculus GN=Cav2 PE=1 SV=1	Cav2	CAV2_MOUSE	18 kDa			3	3	3	3	3	3		1			1	1	1		FALSE	FALSE	FALSE	FALSE	FALSE	FALSE
Eukaryotic translation initiation factor 3 subunit B OS=Mus musculus GN=Eif3b PE=1 SV=1	Eif3b	EIF3B_MOUSE	91 kDa			6	6	5	9	4	3		0.22688			1.5	0.666667	0.6		FALSE	FALSE	FALSE	FALSE	FALSE	FALSE
Protein-glutamine gamma-glutamyltransferase 2 OS=Mus musculus GN=Tgm2 PE=1 SV=4	Tgm2	TGM2_MOUSE	77 kDa			8	9	6	7	4	8		0.167844			0.875	0.444444	1.33333		FALSE	FALSE	FALSE	FALSE	FALSE	FALSE
Dolichyl-diphosphooligosaccharide--protein glycosyltransferase subunit 1 OS=Mus musculus GN=Rpn1 PE=1 SV=1	Rpn1	RPN1_MOUSE	69 kDa			7	8	7	12	5	2		0.0160198			1.71429	0.625	0.285714		FALSE	FALSE	FALSE	FALSE	FALSE	FALSE
Cyclin-dependent kinase 1 OS=Mus musculus GN=Cdk1 PE=1 SV=3	Cdk1	CDK1_MOUSE	34 kDa			6	5	8	9	5	4		0.173774			1.5	1	0.5		FALSE	FALSE	FALSE	FALSE	FALSE	FALSE
Heterogeneous nuclear ribonucleoprotein K OS=Mus musculus GN=Hnrnpk PE=1 SV=1	Hnrnpk	HNRPK_MOUSE	51 kDa			5	7	6	9	6	4		0.134692			1.8	0.857143	0.666667		FALSE	TRUE	FALSE	FALSE	FALSE	FALSE
60S ribosomal protein L15 OS=Mus musculus GN=Rpl15 PE=2 SV=4	Rpl15	RL15_MOUSE	24 kDa			6	5	6	7	5	5		0.846482			1.16667	1	0.833333		TRUE	FALSE	FALSE	FALSE	FALSE	FALSE
Galectin-3 OS=Mus musculus GN=Lgals3 PE=1 SV=3	Lgals3	LEG3_MOUSE	28 kDa			5	5	5	4	6	2		0.332871			0.8	1.2	0.4		FALSE	TRUE	FALSE	FALSE	FALSE	FALSE
Arginine--tRNA ligase, cytoplasmic OS=Mus musculus GN=Rars PE=2 SV=2	Rars	SYRC_MOUSE	76 kDa			7	6	8	7	3	4		0.173774			1	0.5	0.5		TRUE	FALSE	FALSE	FALSE	FALSE	FALSE
GTP-binding nuclear protein Ran OS=Mus musculus GN=Ran PE=1 SV=3	Ran	RAN_MOUSE	24 kDa			7	6	6	6	6	4		0.667136			0.857143	1	0.666667		FALSE	FALSE	FALSE	FALSE	FALSE	TRUE
40S ribosomal protein S11 OS=Mus musculus GN=Rps11 PE=1 SV=3	Rps11	RS11_MOUSE	18 kDa			6	6	10	6	9	3		0.0407622			1	1.5	0.3		FALSE	FALSE	FALSE	FALSE	FALSE	FALSE
T-complex protein 1 subunit gamma OS=Mus musculus GN=Cct3 PE=1 SV=1	Cct3	TCPG_MOUSE	61 kDa			7	6	7	6	5	4		0.4504			0.857143	0.833333	0.571429		FALSE	FALSE	FALSE	FALSE	FALSE	FALSE
Stress-induced-phosphoprotein 1 OS=Mus musculus GN=Stip1 PE=1 SV=1	Stip1	STIP1_MOUSE	63 kDa			7	6	6	7	4	2		0.188876			1	0.666667	0.333333		FALSE	FALSE	FALSE	FALSE	FALSE	FALSE
Alanine--tRNA ligase, cytoplasmic OS=Mus musculus GN=Aars PE=1 SV=1	Aars	SYAC_MOUSE	107 kDa			8	7	9	10		3		0.105399			1.25		0.333333		FALSE	FALSE	FALSE	FALSE	FALSE	FALSE
Moesin OS=Mus musculus GN=Msn PE=1 SV=3	Msn	MOES_MOUSE	68 kDa			15	3	5	8	3			0.195278			0.533333	1			FALSE	FALSE	FALSE	FALSE	FALSE	FALSE
Nucleoside diphosphate kinase B OS=Mus musculus GN=Nme2 PE=1 SV=1	Nme2	NDKB_MOUSE	17 kDa			5	4	4	4	3	3		0.704688			0.8	0.75	0.75		FALSE	FALSE	FALSE	FALSE	FALSE	FALSE
Trifunctional purine biosynthetic protein adenosine-3 OS=Mus musculus GN=Gart PE=2 SV=3	Gart	PUR2_MOUSE	108 kDa			12	7	7	8	5	2		0.0646935			0.666667	0.714286	0.285714		FALSE	FALSE	FALSE	FALSE	FALSE	FALSE
14-3-3 protein eta OS=Mus musculus GN=Ywhah PE=1 SV=2	Ywhah	1433F_MOUSE	28 kDa			4	3	5	5	2	4		0.675929			1.25	0.666667	0.8		FALSE	FALSE	FALSE	FALSE	FALSE	FALSE
Far upstream element-binding protein 1 OS=Mus musculus GN=Fubp1 PE=1 SV=1	Fubp1	FUBP1_MOUSE	69 kDa			12	5	5	10	4			0.765928			0.833333	0.8			FALSE	FALSE	FALSE	FALSE	FALSE	FALSE
Dihydropyrimidinase-related protein 2 OS=Mus musculus GN=Dpysl2 PE=1 SV=2	Dpysl2	DPYL2_MOUSE	62 kDa			8	7	5	6	5	4		0.529557			0.75	0.714286	0.8		FALSE	FALSE	FALSE	FALSE	FALSE	FALSE
Eukaryotic translation initiation factor 5B OS=Mus musculus GN=Eif5b PE=1 SV=2	Eif5b	IF2P_MOUSE	138 kDa			5	4	3	4	7	4		0.248661			0.8	1.75	1.33333		FALSE	FALSE	FALSE	FALSE	FALSE	FALSE
ATP-dependent 6-phosphofructokinase, liver type OS=Mus musculus GN=Pfkl PE=1 SV=4	Pfkl	PFKAL_MOUSE	85 kDa			5	8	6	8	3	6		0.0852216			1.6	0.375	1		FALSE	FALSE	FALSE	FALSE	FALSE	FALSE
ATP-dependent RNA helicase DDX3Y OS=Mus musculus GN=Ddx3y PE=1 SV=2	Ddx3y	DDX3Y_MOUSE	73 kDa			4	2	6	8	4	4		0.035674			2	2	0.666667		FALSE	FALSE	FALSE	FALSE	FALSE	FALSE
DNA replication licensing factor MCM7 OS=Mus musculus GN=Mcm7 PE=1 SV=1	Mcm7	MCM7_MOUSE	81 kDa			9	7	7	7	4			0.421018			0.777778	0.571429			FALSE	FALSE	FALSE	FALSE	FALSE	FALSE
Eukaryotic translation initiation factor 3 subunit A OS=Mus musculus GN=Eif3a PE=1 SV=5	Eif3a	EIF3A_MOUSE	162 kDa			11	8	8	5				0.194687			0.454545				FALSE	FALSE	FALSE	FALSE	FALSE	FALSE
Annexin A2 OS=Mus musculus GN=Anxa2 PE=1 SV=2	Anxa2	ANXA2_MOUSE	39 kDa			7	6	5	6	8	4		0.603649			0.857143	1.33333	0.8		FALSE	FALSE	FALSE	FALSE	FALSE	FALSE
DNA replication licensing factor MCM2 OS=Mus musculus GN=Mcm2 PE=1 SV=3	Mcm2	MCM2_MOUSE	102 kDa			8	5	7	8	3			0.67032			1	0.6			FALSE	FALSE	FALSE	FALSE	FALSE	FALSE
Multifunctional protein ADE2 OS=Mus musculus GN=Paics PE=1 SV=4	Paics	PUR6_MOUSE	47 kDa			11	4	6	8	3	4		0.420032			0.727273	0.75	0.666667		TRUE	FALSE	FALSE	FALSE	FALSE	FALSE
60S ribosomal protein L5 OS=Mus musculus GN=Rpl5 PE=1 SV=3	Rpl5	RL5_MOUSE	34 kDa			6	5	6	6		2		0.263597			1		0.333333		FALSE	FALSE	FALSE	FALSE	FALSE	FALSE
Vinculin OS=Mus musculus GN=Vcl PE=1 SV=4	Vcl	VINC_MOUSE	117 kDa			8	4	8	8	2			0.606531			1	0.5			FALSE	FALSE	FALSE	FALSE	FALSE	FALSE
Plectin OS=Mus musculus GN=Plec PE=1 SV=3	Plec	PLEC_MOUSE	534 kDa			8	3	2	2	3			0.105399			0.25	1			TRUE	FALSE	FALSE	FALSE	FALSE	FALSE
40S ribosomal protein S16 OS=Mus musculus GN=Rps16 PE=2 SV=4	Rps16	RS16_MOUSE	16 kDa			5	6	5	5	6	4		0.904837			1	1	0.8		FALSE	FALSE	FALSE	FALSE	FALSE	FALSE
Sarcoplasmic/endoplasmic reticulum calcium ATPase 2 OS=Mus musculus GN=Atp2a2 PE=1 SV=2	Atp2a2	AT2A2_MOUSE	115 kDa			10	5	5	6	5	2		0.182684			0.6	1	0.4		FALSE	FALSE	FALSE	FALSE	FALSE	FALSE
Exportin-1 OS=Mus musculus GN=Xpo1 PE=1 SV=1	Xpo1	XPO1_MOUSE	123 kDa			6	6	7	5	3	5		0.326591			0.833333	0.5	0.714286		FALSE	FALSE	FALSE	FALSE	FALSE	FALSE
Poly [ADP-ribose] polymerase 9 OS=Mus musculus GN=Parp9 PE=1 SV=2	Parp9	PARP9_MOUSE	97 kDa			6	6	9	9		6		0.286505			1.5		0.666667		FALSE	FALSE	FALSE	FALSE	FALSE	FALSE
Myosin light polypeptide 6 OS=Mus musculus GN=Myl6 PE=1 SV=3	Myl6	MYL6_MOUSE	17 kDa			4	6	5	6	5	3		0.374062			1.5	0.833333	0.6		FALSE	FALSE	FALSE	FALSE	FALSE	FALSE
ADP-ribosylation factor 1 OS=Mus musculus GN=Arf1 PE=1 SV=2	Arf1	ARF1_MOUSE	21 kDa			7	5	6	6	3	2		0.164514			0.857143	0.6	0.333333		FALSE	FALSE	TRUE	FALSE	FALSE	FALSE
Alanyl-tRNA editing protein Aarsd1 OS=Mus musculus GN=Aarsd1 PE=1 SV=2	Aarsd1	AASD1_MOUSE	45 kDa			7	6	6	7	3	5		0.434598			1	0.5	0.833333		FALSE	FALSE	FALSE	FALSE	FALSE	FALSE
Interferon-induced protein with tetratricopeptide repeats 1 OS=Mus musculus GN=Ifit1 PE=1 SV=2	Ifit1	IFIT1_MOUSE	54 kDa			6	6	7	5	2	3		0.0773416			0.833333	0.333333	0.428571		FALSE	FALSE	FALSE	FALSE	FALSE	FALSE
Ubiquitin thioesterase OTUB1 OS=Mus musculus GN=Otub1 PE=1 SV=2	Otub1	OTUB1_MOUSE	31 kDa			5	3	5	6	4	3		0.513417			1.2	1.33333	0.6		FALSE	FALSE	FALSE	FALSE	FALSE	FALSE
Glutathione S-transferase Mu 1 OS=Mus musculus GN=Gstm1 PE=1 SV=2	Gstm1	GSTM1_MOUSE	26 kDa			4	6	6	7	6	2		0.0855775			1.75	1	0.333333		FALSE	FALSE	FALSE	FALSE	FALSE	FALSE
60S ribosomal protein L7 OS=Mus musculus GN=Rpl7 PE=1 SV=2	Rpl7	RL7_MOUSE	31 kDa			2	4	3	3	2	2		0.39985			1.5	0.5	0.666667		FALSE	FALSE	FALSE	FALSE	FALSE	FALSE
Protein disulfide-isomerase OS=Mus musculus GN=P4hb PE=1 SV=2	P4hb	PDIA1_MOUSE	57 kDa			12	2	7	9	2	2		0.115243			0.75	1	0.285714		FALSE	FALSE	FALSE	FALSE	FALSE	FALSE
Major vault protein OS=Mus musculus GN=Mvp PE=1 SV=4	Mvp	MVP_MOUSE	96 kDa			5	5	7	6	4	4		0.430479			1.2	0.8	0.571429		FALSE	FALSE	FALSE	FALSE	FALSE	FALSE
Muskelin OS=Mus musculus GN=Mkln1 PE=1 SV=1	Mkln1	MKLN1_MOUSE	85 kDa			7	5	7	5	2	3		0.0974348			0.714286	0.4	0.428571		FALSE	FALSE	FALSE	FALSE	FALSE	FALSE
Prohibitin-2 OS=Mus musculus GN=Phb2 PE=1 SV=1	Phb2	PHB2_MOUSE	33 kDa			5	6	5	5	3	2		0.19205			1	0.5	0.4		FALSE	FALSE	FALSE	FALSE	FALSE	FALSE
14-3-3 protein theta OS=Mus musculus GN=Ywhaq PE=1 SV=1	Ywhaq	1433T_MOUSE	28 kDa			4	3	4	4	5	2		0.311403			1	1.66667	0.5		FALSE	FALSE	FALSE	FALSE	FALSE	FALSE
Heat shock protein 105 kDa OS=Mus musculus GN=Hsph1 PE=1 SV=2	Hsph1	HS105_MOUSE	96 kDa			8	4	6	6		2		0.20529			0.75		0.333333		FALSE	FALSE	FALSE	FALSE	FALSE	FALSE
26S protease regulatory subunit 7 OS=Mus musculus GN=Psmc2 PE=1 SV=5	Psmc2	PRS7_MOUSE	49 kDa			9	6	8	5	4	3		0.0617462			0.555556	0.666667	0.375		FALSE	FALSE	FALSE	TRUE	FALSE	FALSE
Aldose reductase OS=Mus musculus GN=Akr1b1 PE=1 SV=3	Akr1b1	ALDR_MOUSE	36 kDa			9	6	6	9	4	2		0.188876			1	0.666667	0.333333		FALSE	FALSE	FALSE	FALSE	FALSE	FALSE
Calmodulin-1 OS=Mus musculus OX=10090 GN=Calm1 PE=1 SV=1	Calm1	CALM1_MOUSE	?			5	3	3	6		2		0.765928			1.2		0.666667		FALSE	FALSE	FALSE	FALSE	FALSE	FALSE
Hydroxymethylglutaryl-CoA synthase, cytoplasmic OS=Mus musculus GN=Hmgcs1 PE=1 SV=1	Hmgcs1	HMCS1_MOUSE	58 kDa			4	5	4	6	3	2		0.246597			1.5	0.6	0.5		FALSE	FALSE	FALSE	FALSE	FALSE	FALSE
DnaJ homolog subfamily A member 1 OS=Mus musculus GN=Dnaja1 PE=1 SV=1	Dnaja1	DNJA1_MOUSE	45 kDa			3	4	5	6	3	2		0.0800583			2	0.75	0.4		FALSE	FALSE	FALSE	FALSE	FALSE	FALSE
Annexin A3 OS=Mus musculus GN=Anxa3 PE=1 SV=4	Anxa3	ANXA3_MOUSE	36 kDa			10	5	5	10	3			0.67032			1	0.6			FALSE	FALSE	FALSE	FALSE	FALSE	FALSE
Ubiquitin-like modifier-activating enzyme 1 OS=Mus musculus GN=Uba1 PE=1 SV=1	Uba1	UBA1_MOUSE	118 kDa			9	6	5	10	3			0.44684			1.11111	0.5			FALSE	FALSE	FALSE	FALSE	FALSE	FALSE
Prohibitin OS=Mus musculus GN=Phb PE=1 SV=1	Phb	PHB_MOUSE	30 kDa			5	5	6	5	5	3		0.472367			1	1	0.5		FALSE	FALSE	FALSE	FALSE	FALSE	FALSE
60S ribosomal protein L4 OS=Mus musculus GN=Rpl4 PE=1 SV=3	Rpl4	RL4_MOUSE	47 kDa			7	3	4	5	3	5		0.663176			0.714286	1	1.25		FALSE	FALSE	FALSE	FALSE	FALSE	FALSE
40S ribosomal protein S3a OS=Mus musculus GN=Rps3a PE=1 SV=3	Rps3a	RS3A_MOUSE	30 kDa			5	5	6	4	4	2		0.215815			0.8	0.8	0.333333		FALSE	FALSE	FALSE	FALSE	FALSE	FALSE
Lipoamide acyltransferase component of branched-chain alpha-keto acid dehydrogenase complex, mitochondrial OS=Mus musculus GN=Dbt PE=1 SV=2	Dbt	ODB2_MOUSE	53 kDa			5	4	8	5	2	4		0.22313			1	0.5	0.5		FALSE	FALSE	FALSE	FALSE	FALSE	FALSE
Titin OS=Mus musculus GN=Ttn PE=1 SV=1	Ttn	TITIN_MOUSE	3906 kDa			2														FALSE	FALSE	FALSE	FALSE	FALSE	FALSE
Interferon-induced very large GTPase 1 OS=Mus musculus GN=Gvin1 PE=1 SV=1	Gvin1	GVIN1_MOUSE	281 kDa			4	2	3	5		2		0.747018			1.25		0.666667		FALSE	FALSE	FALSE	FALSE	FALSE	FALSE
60S acidic ribosomal protein P0 OS=Mus musculus GN=Rplp0 PE=1 SV=3	Rplp0	RLA0_MOUSE	34 kDa			6	4	4	5	6	2		0.338465			0.833333	1.5	0.5		FALSE	FALSE	FALSE	FALSE	FALSE	FALSE
26S protease regulatory subunit 6B OS=Mus musculus GN=Psmc4 PE=1 SV=2	Psmc4	PRS6B_MOUSE	47 kDa			8	6	7	4	4	4		0.138596			0.5	0.666667	0.571429		FALSE	FALSE	FALSE	FALSE	FALSE	FALSE
Dihydrolipoyllysine-residue succinyltransferase component of 2-oxoglutarate dehydrogenase complex, mitochondrial OS=Mus musculus GN=Dlst PE=1 SV=1	Dlst	ODO2_MOUSE	49 kDa			6	5	6	5	3	3		0.29132			0.833333	0.6	0.5		FALSE	FALSE	FALSE	FALSE	FALSE	FALSE
Elongation factor Tu, mitochondrial OS=Mus musculus GN=Tufm PE=1 SV=1	Tufm	EFTU_MOUSE	50 kDa			6	3	3	3	2	3		0.39985			0.5	0.666667	1		FALSE	FALSE	FALSE	FALSE	FALSE	FALSE
Cardiomyopathy-associated protein 5 OS=Mus musculus GN=Cmya5 PE=1 SV=2	Cmya5	CMYA5_MOUSE	413 kDa						2		2									FALSE	FALSE	FALSE	FALSE	FALSE	FALSE
Spectrin beta chain, non-erythrocytic 1 OS=Mus musculus GN=Sptbn1 PE=1 SV=2	Sptbn1	SPTB2_MOUSE	274 kDa			7	2	4	5				0.751477			0.714286				FALSE	FALSE	FALSE	FALSE	FALSE	FALSE
C-1-tetrahydrofolate synthase, cytoplasmic OS=Mus musculus GN=Mthfd1 PE=1 SV=4	Mthfd1	C1TC_MOUSE	101 kDa			7	5	7	7	3	4		0.352446			1	0.6	0.571429		FALSE	FALSE	FALSE	FALSE	FALSE	FALSE
Serine--tRNA ligase, cytoplasmic OS=Mus musculus GN=Sars PE=2 SV=3	Sars	SYSC_MOUSE	58 kDa			7	5	7	6	4	4		0.442956			0.857143	0.8	0.571429		FALSE	FALSE	FALSE	FALSE	FALSE	FALSE
Phosphate carrier protein, mitochondrial OS=Mus musculus GN=Slc25a3 PE=1 SV=1	Slc25a3	MPCP_MOUSE	40 kDa			3	4	4	5	5	2		0.274812			1.66667	1.25	0.5		FALSE	FALSE	FALSE	FALSE	FALSE	FALSE
DNA replication licensing factor MCM4 OS=Mus musculus GN=Mcm4 PE=1 SV=1	Mcm4	MCM4_MOUSE	97 kDa			8	5	6	7	3	3		0.297453			0.875	0.6	0.5		FALSE	FALSE	FALSE	FALSE	FALSE	FALSE
Far upstream element-binding protein 2 OS=Mus musculus GN=Khsrp PE=1 SV=2	Khsrp	FUBP2_MOUSE	77 kDa			6	3	6	6	4	2		0.22313			1	1.33333	0.333333		FALSE	TRUE	FALSE	FALSE	FALSE	FALSE
Annexin A1 OS=Mus musculus GN=Anxa1 PE=1 SV=2	Anxa1	ANXA1_MOUSE	39 kDa			7	4	8	7	6			0.606531			1	1.5			FALSE	FALSE	FALSE	FALSE	FALSE	FALSE
Cellular tumor antigen p53 OS=Mus musculus GN=Tp53 PE=1 SV=3	Tp53	P53_MOUSE	43 kDa			4	5	5	4	3	3		0.449329			1	0.6	0.6		FALSE	FALSE	FALSE	FALSE	FALSE	FALSE
60S ribosomal protein L6 OS=Mus musculus GN=Rpl6 PE=1 SV=3	Rpl6	RL6_MOUSE	34 kDa			6	5	6	4	5	4		0.513417			0.666667	1	0.666667		FALSE	FALSE	FALSE	FALSE	FALSE	FALSE
Eukaryotic translation initiation factor 3 subunit C OS=Mus musculus GN=Eif3c PE=1 SV=1	Eif3c	EIF3C_MOUSE	106 kDa			7	4	5	7	3	2		0.358796			1	0.75	0.4		FALSE	FALSE	FALSE	FALSE	FALSE	FALSE
Protein-L-isoaspartate(D-aspartate) O-methyltransferase OS=Mus musculus GN=Pcmt1 PE=1 SV=3	Pcmt1	PIMT_MOUSE	25 kDa			2	5	3	6	6	3		0.0165727			3	1.2	1		FALSE	FALSE	FALSE	FALSE	FALSE	FALSE
Annexin A11 OS=Mus musculus GN=Anxa11 PE=1 SV=2	Anxa11	ANX11_MOUSE	54 kDa			4	5	3	3	9			0.178173			0.75	1.8			FALSE	FALSE	FALSE	FALSE	FALSE	FALSE
Myb-binding protein 1A OS=Mus musculus GN=Mybbp1a PE=1 SV=2	Mybbp1a	MBB1A_MOUSE	152 kDa			6	3	2	3	5			0.242521			0.5	1.66667			FALSE	FALSE	FALSE	FALSE	FALSE	FALSE
40S ribosomal protein S9 OS=Mus musculus GN=Rps9 PE=1 SV=3	Rps9	RS9_MOUSE	23 kDa			5	3	4	2	3	4		0.40657			0.4	1	1		FALSE	FALSE	FALSE	FALSE	FALSE	FALSE
Galectin-1 OS=Mus musculus GN=Lgals1 PE=1 SV=3	Lgals1	LEG1_MOUSE	15 kDa			5	4	5	5	4	4		0.904837			1	1	0.8		FALSE	FALSE	FALSE	FALSE	FALSE	FALSE
60S ribosomal protein L10a OS=Mus musculus GN=Rpl10a PE=1 SV=3	Rpl10a	RL10A_MOUSE	25 kDa			4	3	4	3	4	2		0.453089			0.75	1.33333	0.5		FALSE	FALSE	FALSE	FALSE	FALSE	FALSE
Heat shock protein 75 kDa, mitochondrial OS=Mus musculus GN=Trap1 PE=1 SV=1	Trap1	TRAP1_MOUSE	80 kDa			6	3	5	5	2	2		0.316637			0.833333	0.666667	0.4		FALSE	FALSE	FALSE	FALSE	FALSE	FALSE
Putative pre-mRNA-splicing factor ATP-dependent RNA helicase DHX15 OS=Mus musculus GN=Dhx15 PE=1 SV=2	Dhx15	DHX15_MOUSE	91 kDa			5	4	2	5	4	2		1			1	1	1		FALSE	TRUE	FALSE	FALSE	FALSE	FALSE
Obscurin OS=Mus musculus GN=Obscn PE=2 SV=2	Obscn	OBSCN_MOUSE	966 kDa			2	2	2		2	3		0.778801				1	1.5		FALSE	FALSE	FALSE	FALSE	FALSE	FALSE
Four and a half LIM domains protein 2 OS=Mus musculus GN=Fhl2 PE=1 SV=1	Fhl2	FHL2_MOUSE	32 kDa			6	2	6	4		7		0.659241			0.666667		1.16667		FALSE	FALSE	FALSE	FALSE	FALSE	FALSE
26S protease regulatory subunit 4 OS=Mus musculus GN=Psmc1 PE=1 SV=1	Psmc1	PRS4_MOUSE	49 kDa			4	3	3	6	3			0.606531			1.5	1			FALSE	FALSE	FALSE	FALSE	FALSE	FALSE
Apoptosis-inducing factor 1, mitochondrial OS=Mus musculus GN=Aifm1 PE=1 SV=1	Aifm1	AIFM1_MOUSE	67 kDa			5	3	6	3				0.67032			0.6				FALSE	FALSE	FALSE	FALSE	FALSE	FALSE
40S ribosomal protein S23 OS=Mus musculus GN=Rps23 PE=1 SV=3	Rps23	RS23_MOUSE	16 kDa			3	4	5	5	3	3		0.303715			1.66667	0.75	0.6		FALSE	FALSE	FALSE	FALSE	FALSE	FALSE
Integrin alpha-3 OS=Mus musculus GN=Itga3 PE=1 SV=1	Itga3	ITA3_MOUSE	117 kDa			8	4	6	5	3	2		0.132545			0.625	0.75	0.333333		FALSE	FALSE	FALSE	FALSE	FALSE	FALSE
Annexin A5 OS=Mus musculus GN=Anxa5 PE=1 SV=1	Anxa5	ANXA5_MOUSE	36 kDa			7	4	4	9	5	2		0.402237			1.28571	1.25	0.5		FALSE	FALSE	FALSE	FALSE	FALSE	FALSE
60S ribosomal protein L13 OS=Mus musculus GN=Rpl13 PE=2 SV=3	Rpl13	RL13_MOUSE	24 kDa			4	4	3	2	3	3		0.535261			0.5	0.75	1		FALSE	FALSE	FALSE	FALSE	FALSE	FALSE
Adseverin OS=Mus musculus GN=Scin PE=1 SV=3	Scin	ADSV_MOUSE	80 kDa			6	4	5	7	2	3		0.374062			1.16667	0.5	0.6		FALSE	FALSE	FALSE	FALSE	FALSE	FALSE
Asparagine--tRNA ligase, cytoplasmic OS=Mus musculus GN=Nars PE=1 SV=2	Nars	SYNC_MOUSE	64 kDa			6	5	4	3	2			0.19205			0.5	0.4			FALSE	FALSE	FALSE	FALSE	FALSE	FALSE
Serine hydroxymethyltransferase, mitochondrial OS=Mus musculus OX=10090 GN=Shmt2 PE=1 SV=1	Shmt2	GLYM_MOUSE	?			7	3	5	4	2			0.44507			0.571429	0.666667			FALSE	FALSE	FALSE	FALSE	FALSE	FALSE
Lysine--tRNA ligase OS=Mus musculus GN=Kars PE=1 SV=1	Kars	SYK_MOUSE	68 kDa			7	5	5	5	2			0.305528			0.714286	0.4			FALSE	FALSE	FALSE	FALSE	FALSE	FALSE
Leucine--tRNA ligase, cytoplasmic OS=Mus musculus GN=Lars PE=1 SV=2	Lars	SYLC_MOUSE	134 kDa			10	2	4	4				0.165299			0.4				FALSE	FALSE	FALSE	FALSE	FALSE	FALSE
Phosphoribosylformylglycinamidine synthase OS=Mus musculus GN=Pfas PE=2 SV=1	Pfas	PUR4_MOUSE	145 kDa			6	4	4	6	4			1			1	1			FALSE	FALSE	FALSE	FALSE	FALSE	FALSE
Structural maintenance of chromosomes flexible hinge domain-containing protein 1 OS=Mus musculus GN=Smchd1 PE=1 SV=2	Smchd1	SMHD1_MOUSE	226 kDa			3		3	5		2		0.434598			1.66667		0.666667		FALSE	FALSE	FALSE	FALSE	FALSE	FALSE
Tubulin beta-4B chain OS=Mus musculus GN=Tubb4b PE=1 SV=1	Tubb4b	TBB4B_MOUSE	50 kDa		2	2	3		2	3	2		1			1	1			FALSE	FALSE	FALSE	FALSE	TRUE	FALSE
60S ribosomal protein L18 OS=Mus musculus GN=Rpl18 PE=2 SV=3	Rpl18	RL18_MOUSE	22 kDa			3	4	3	3	3	3		0.882497			1	0.75	1		FALSE	FALSE	FALSE	FALSE	FALSE	FALSE
Transcription elongation factor B polypeptide 1 OS=Mus musculus GN=Tceb1 PE=1 SV=1	Tceb1	ELOC_MOUSE	12 kDa			4	3	5	5	3	3		0.591555			1.25	1	0.6		FALSE	FALSE	FALSE	TRUE	FALSE	FALSE
Protein S100-A6 OS=Mus musculus GN=S100a6 PE=1 SV=3	S100a6	S10A6_MOUSE	10 kDa			4	3	4	5	3	3		0.778801			1.25	1	0.75		FALSE	FALSE	FALSE	FALSE	FALSE	FALSE
Heterogeneous nuclear ribonucleoprotein M OS=Mus musculus GN=Hnrnpm PE=1 SV=3	Hnrnpm	HNRPM_MOUSE	78 kDa			7	5	6	5				0.751477			0.714286				FALSE	TRUE	FALSE	FALSE	FALSE	FALSE
Tropomyosin alpha-3 chain OS=Mus musculus GN=Tpm3 PE=1 SV=3	Tpm3	TPM3_MOUSE	33 kDa			7	5	5	4	3			0.352446			0.571429	0.6			FALSE	FALSE	FALSE	FALSE	FALSE	FALSE
40S ribosomal protein S8 OS=Mus musculus GN=Rps8 PE=1 SV=2	Rps8	RS8_MOUSE	24 kDa			5	3	4	3	3	4		0.67032			0.6	1	1		FALSE	FALSE	FALSE	FALSE	FALSE	FALSE
Heterogeneous nuclear ribonucleoprotein F OS=Mus musculus GN=Hnrnpf PE=1 SV=3	Hnrnpf	HNRPF_MOUSE	46 kDa			4	3	4	3	2	3		0.659241			0.75	0.666667	0.75		FALSE	TRUE	FALSE	FALSE	FALSE	FALSE
Puromycin-sensitive aminopeptidase OS=Mus musculus GN=Npepps PE=1 SV=2	Npepps	PSA_MOUSE	103 kDa			4	2	7	5	3	2		0.115243			1.25	1.5	0.285714		FALSE	FALSE	FALSE	FALSE	FALSE	FALSE
Proteasome subunit alpha type-5 OS=Mus musculus GN=Psma5 PE=1 SV=1	Psma5	PSA5_MOUSE	26 kDa			5	2	3	5	3	2		0.659241			1	1.5	0.666667		FALSE	FALSE	FALSE	TRUE	FALSE	FALSE
Serine/threonine-protein phosphatase 2A 65 kDa regulatory subunit A alpha isoform OS=Mus musculus GN=Ppp2r1a PE=1 SV=3	Ppp2r1a	2AAA_MOUSE	65 kDa			6	4		6	3			0.882497			1	0.75			FALSE	FALSE	FALSE	FALSE	FALSE	FALSE
Heterogeneous nuclear ribonucleoprotein U OS=Mus musculus GN=Hnrnpu PE=1 SV=1	Hnrnpu	HNRPU_MOUSE	88 kDa			6	3		3				0.472367			0.5				FALSE	TRUE	FALSE	FALSE	FALSE	FALSE
Protein SET OS=Mus musculus GN=Set PE=1 SV=1	Set	SET_MOUSE	33 kDa			4	3	5	5	3			0.882497			1.25	1			FALSE	FALSE	FALSE	FALSE	FALSE	FALSE
ADP/ATP translocase 2 OS=Mus musculus GN=Slc25a5 PE=1 SV=3	Slc25a5	ADT2_MOUSE	33 kDa			4	5	4	5	6	5		0.704688			1.25	1.2	1.25		FALSE	FALSE	FALSE	FALSE	FALSE	FALSE
40S ribosomal protein S4, X isoform OS=Mus musculus GN=Rps4x PE=2 SV=2	Rps4x	RS4X_MOUSE	30 kDa			6	4	6	5	4	3		0.434598			0.833333	1	0.5		FALSE	FALSE	FALSE	FALSE	FALSE	FALSE
Calpain-2 catalytic subunit OS=Mus musculus GN=Capn2 PE=2 SV=4	Capn2	CAN2_MOUSE	80 kDa			4	3	5	4	4	2		0.344154			1	1.33333	0.4		FALSE	FALSE	FALSE	FALSE	FALSE	FALSE
A-kinase anchor protein 12 OS=Mus musculus GN=Akap12 PE=1 SV=1	Akap12	AKA12_MOUSE	181 kDa			6	3	2	7	2	3		0.606531			1.16667	0.666667	1.5		FALSE	FALSE	FALSE	FALSE	FALSE	FALSE
Cytochrome b-c1 complex subunit 2, mitochondrial OS=Mus musculus GN=Uqcrc2 PE=1 SV=1	Uqcrc2	QCR2_MOUSE	48 kDa			3	3	4	4	2			0.716531			1.33333	0.666667			FALSE	FALSE	FALSE	FALSE	FALSE	FALSE
Heat shock 70 kDa protein 4L OS=Mus musculus GN=Hspa4l PE=1 SV=2	Hspa4l	HS74L_MOUSE	94 kDa			4	5	5	5				0.882497			1.25				FALSE	FALSE	FALSE	FALSE	FALSE	FALSE
Polyadenylate-binding protein 1 OS=Mus musculus GN=Pabpc1 PE=1 SV=2	Pabpc1	PABP1_MOUSE	71 kDa			5		5	5	3			1			1				FALSE	TRUE	FALSE	FALSE	FALSE	FALSE
Alpha-actinin-4 OS=Mus musculus GN=Actn4 PE=1 SV=1	Actn4	ACTN4_MOUSE	105 kDa			4	2	4	4				1			1				FALSE	FALSE	FALSE	FALSE	FALSE	FALSE
Myoferlin OS=Mus musculus GN=Myof PE=1 SV=2	Myof	MYOF_MOUSE	233 kDa			5	3	3	6				0.904837			1.2				FALSE	FALSE	FALSE	FALSE	FALSE	FALSE
Actin-related protein 3 OS=Mus musculus GN=Actr3 PE=1 SV=3	Actr3	ARP3_MOUSE	47 kDa			6	2	5	5		3		0.616724			0.833333		0.6		FALSE	FALSE	FALSE	FALSE	FALSE	FALSE
Isocitrate dehydrogenase [NADP], mitochondrial OS=Mus musculus GN=Idh2 PE=1 SV=3	Idh2	IDHP_MOUSE	51 kDa			5	6	4	4	3			0.427415			0.8	0.5			FALSE	FALSE	FALSE	FALSE	FALSE	FALSE
Signal transducer and activator of transcription 1 OS=Mus musculus GN=Stat1 PE=1 SV=1	Stat1	STAT1_MOUSE	87 kDa			4	5	6	5				0.882497			1.25				TRUE	FALSE	FALSE	FALSE	FALSE	FALSE
Ras-related protein Rab-1A OS=Mus musculus GN=Rab1A PE=1 SV=3	Rab1A	RAB1A_MOUSE	23 kDa			5	2	4	6		2		0.548812			1.2		0.5		FALSE	FALSE	TRUE	FALSE	FALSE	FALSE
E3 ubiquitin-protein ligase UBR4 OS=Mus musculus GN=Ubr4 PE=1 SV=1	Ubr4	UBR4_MOUSE	572 kDa			6	2	3	2				0.263597			0.333333				FALSE	FALSE	FALSE	FALSE	FALSE	FALSE
Asparagine synthetase [glutamine-hydrolyzing] OS=Mus musculus GN=Asns PE=2 SV=3	Asns	ASNS_MOUSE	64 kDa			8		4	9				0.939413			1.125				FALSE	FALSE	FALSE	FALSE	FALSE	FALSE
26S proteasome non-ATPase regulatory subunit 3 OS=Mus musculus GN=Psmd3 PE=1 SV=3	Psmd3	PSMD3_MOUSE	61 kDa			4	2	5	8				0.135335			2				FALSE	FALSE	FALSE	TRUE	FALSE	FALSE
RuvB-like 1 OS=Mus musculus GN=Ruvbl1 PE=1 SV=1	Ruvbl1	RUVB1_MOUSE	50 kDa			5	4	4	7	3			0.591555			1.4	0.75			FALSE	FALSE	FALSE	FALSE	FALSE	FALSE
GMP synthase [glutamine-hydrolyzing] OS=Mus musculus GN=Gmps PE=1 SV=2	Gmps	GUAA_MOUSE	77 kDa			8	3	3	4	2			0.311403			0.5	0.666667			FALSE	FALSE	FALSE	FALSE	FALSE	FALSE
40S ribosomal protein S14 OS=Mus musculus GN=Rps14 PE=2 SV=3	Rps14	RS14_MOUSE	16 kDa			5	4	4	4	3	2		0.484325			0.8	0.75	0.5		FALSE	FALSE	FALSE	FALSE	FALSE	FALSE
Peroxiredoxin-6 OS=Mus musculus GN=Prdx6 PE=1 SV=3	Prdx6	PRDX6_MOUSE	25 kDa			6	4	4	3	3	2		0.25284			0.5	0.75	0.5		TRUE	FALSE	FALSE	FALSE	FALSE	FALSE
Zyxin OS=Mus musculus GN=Zyx PE=1 SV=2	Zyx	ZYX_MOUSE	61 kDa			4	4	2	3	3	4		0.286505			0.75	0.75	2		FALSE	FALSE	FALSE	FALSE	FALSE	FALSE
Paxillin OS=Mus musculus GN=Pxn PE=1 SV=1	Pxn	PAXI_MOUSE	64 kDa			3	3	4	4	3	2		0.513417			1.33333	1	0.5		FALSE	FALSE	FALSE	FALSE	FALSE	FALSE
Trifunctional enzyme subunit alpha, mitochondrial OS=Mus musculus GN=Hadha PE=1 SV=1	Hadha	ECHA_MOUSE	83 kDa			5	2	5	7	3			0.522046			1.4	1.5			FALSE	FALSE	FALSE	FALSE	FALSE	FALSE
Glycine--tRNA ligase OS=Mus musculus OX=10090 GN=Gars PE=1 SV=1	Gars	GARS_MOUSE	?			6	4	6	5	2	2		0.147096			0.833333	0.5	0.333333		FALSE	FALSE	FALSE	FALSE	FALSE	FALSE
Acetyl-CoA carboxylase 1 OS=Mus musculus GN=Acaca PE=1 SV=1	Acaca	ACACA_MOUSE	265 kDa			5	4	4	4				0.904837			0.8				FALSE	FALSE	FALSE	FALSE	FALSE	FALSE
Delta-1-pyrroline-5-carboxylate synthase OS=Mus musculus GN=Aldh18a1 PE=1 SV=2	Aldh18a1	P5CS_MOUSE	87 kDa			5	4	4	4	3			0.798516			0.8	0.75			FALSE	FALSE	FALSE	FALSE	FALSE	FALSE
Dihydrolipoyllysine-residue acetyltransferase component of pyruvate dehydrogenase complex, mitochondrial OS=Mus musculus GN=Dlat PE=1 SV=2	Dlat	ODP2_MOUSE	68 kDa			6	4	4	5		5		0.811936			0.833333		1.25		FALSE	FALSE	FALSE	FALSE	FALSE	FALSE
60S ribosomal protein L3 OS=Mus musculus GN=Rpl3 PE=1 SV=3	Rpl3	RL3_MOUSE	46 kDa			3	3	4	2	3	2		0.513417			0.666667	1	0.5		FALSE	FALSE	FALSE	FALSE	FALSE	FALSE
Elongation factor 1-beta OS=Mus musculus GN=Eef1b PE=1 SV=5	Eef1b	EF1B_MOUSE	25 kDa			4	4	4	3	3	4		0.778801			0.75	0.75	1		FALSE	FALSE	FALSE	FALSE	FALSE	FALSE
Protein CDV3 OS=Mus musculus GN=Cdv3 PE=1 SV=2	Cdv3	CDV3_MOUSE	30 kDa			5	3	3	2	8	3		0.0063034			0.4	2.66667	1		FALSE	FALSE	FALSE	FALSE	FALSE	FALSE
40S ribosomal protein S27 OS=Mus musculus GN=Rps27 PE=1 SV=3	Rps27	RS27_MOUSE	9 kDa			2	3	3	5		3		0.105399			2.5		1		FALSE	FALSE	FALSE	FALSE	FALSE	FALSE
Electron transfer flavoprotein subunit alpha, mitochondrial OS=Mus musculus GN=Etfa PE=1 SV=2	Etfa	ETFA_MOUSE	35 kDa			4	4	5	5		3		0.591555			1.25		0.6		FALSE	FALSE	FALSE	FALSE	FALSE	FALSE
60S ribosomal protein L28 OS=Mus musculus GN=Rpl28 PE=1 SV=2	Rpl28	RL28_MOUSE	16 kDa			6		6	6		5		0.920044			1		0.833333		FALSE	FALSE	FALSE	FALSE	FALSE	FALSE
Nucleosome assembly protein 1-like 1 OS=Mus musculus GN=Nap1l1 PE=1 SV=2	Nap1l1	NP1L1_MOUSE	45 kDa			4	4	2	3	2	2		0.535261			0.75	0.5	1		FALSE	FALSE	FALSE	FALSE	FALSE	FALSE
Translationally-controlled tumor protein OS=Mus musculus GN=Tpt1 PE=1 SV=1	Tpt1	TCTP_MOUSE	19 kDa			4	3	3	4	3			1			1	1			FALSE	FALSE	FALSE	FALSE	FALSE	FALSE
Isoleucine--tRNA ligase, cytoplasmic OS=Mus musculus GN=Iars PE=2 SV=2	Iars	SYIC_MOUSE	144 kDa			4	6	7	4	2			0.263597			1	0.333333			FALSE	FALSE	FALSE	FALSE	FALSE	FALSE
Programmed cell death 6-interacting protein OS=Mus musculus GN=Pdcd6ip PE=1 SV=3	Pdcd6ip	PDC6I_MOUSE	96 kDa			3	3	2	3	3			1			1	1			FALSE	FALSE	FALSE	FALSE	FALSE	FALSE
Probable ubiquitin carboxyl-terminal hydrolase FAF-X OS=Mus musculus GN=Usp9x PE=1 SV=2	Usp9x	USP9X_MOUSE	291 kDa			4	2	2	3				0.882497			0.75				FALSE	FALSE	FALSE	TRUE	FALSE	FALSE
TAR DNA-binding protein 43 OS=Mus musculus GN=Tardbp PE=1 SV=1	Tardbp	TADBP_MOUSE	45 kDa			5	3	4	5	4	2		0.513417			1	1.33333	0.5		FALSE	TRUE	FALSE	FALSE	FALSE	FALSE
60S ribosomal protein L9 OS=Mus musculus GN=Rpl9 PE=1 SV=2	Rpl9	RL9_MOUSE	22 kDa			3	3	2	5	2	2		0.434598			1.66667	0.666667	1		FALSE	FALSE	FALSE	FALSE	FALSE	FALSE
Ras-related protein Rab-5C OS=Mus musculus GN=Rab5c PE=1 SV=2	Rab5c	RAB5C_MOUSE	23 kDa			4	3	3	5				0.882497			1.25				FALSE	FALSE	FALSE	FALSE	FALSE	FALSE
Activator of 90 kDa heat shock protein ATPase homolog 1 OS=Mus musculus GN=Ahsa1 PE=2 SV=2	Ahsa1	AHSA1_MOUSE	38 kDa			4	5	4	3		2		0.535261			0.75		0.5		TRUE	FALSE	FALSE	FALSE	FALSE	FALSE
ATP-dependent RNA helicase DDX39A OS=Mus musculus GN=Ddx39a PE=2 SV=1	Ddx39a	DX39A_MOUSE	49 kDa			5	2	4	4	3			0.704688			0.8	1.5			FALSE	TRUE	FALSE	FALSE	FALSE	FALSE
Microtubule-actin cross-linking factor 1 OS=Mus musculus GN=Macf1 PE=1 SV=2	Macf1	MACF1_MOUSE	832 kDa						2											FALSE	FALSE	FALSE	FALSE	FALSE	FALSE
Macrophage-capping protein OS=Mus musculus GN=Capg PE=1 SV=2	Capg	CAPG_MOUSE	39 kDa			6	3	2	3				0.472367			0.5				TRUE	FALSE	FALSE	FALSE	FALSE	FALSE
26S proteasome non-ATPase regulatory subunit 12 OS=Mus musculus GN=Psmd12 PE=1 SV=4	Psmd12	PSD12_MOUSE	53 kDa			3	4	3	5	3	3		0.453089			1.66667	0.75	1		FALSE	FALSE	FALSE	FALSE	FALSE	FALSE
Phosphoserine aminotransferase OS=Mus musculus GN=Psat1 PE=1 SV=1	Psat1	SERC_MOUSE	40 kDa			5	4	3	4	3	2		0.675929			0.8	0.75	0.666667		FALSE	FALSE	FALSE	FALSE	FALSE	FALSE
Isocitrate dehydrogenase [NADP] cytoplasmic OS=Mus musculus GN=Idh1 PE=1 SV=2	Idh1	IDHC_MOUSE	47 kDa			4	5	3	4	2			0.40657			1	0.4			TRUE	FALSE	FALSE	FALSE	FALSE	FALSE
Eukaryotic translation initiation factor 3 subunit I OS=Mus musculus GN=Eif3i PE=1 SV=1	Eif3i	EIF3I_MOUSE	36 kDa			4	3	3	5				0.882497			1.25				FALSE	FALSE	FALSE	FALSE	FALSE	FALSE
60S ribosomal protein L10 OS=Mus musculus GN=Rpl10 PE=1 SV=3	Rpl10	RL10_MOUSE	25 kDa			3	2	3	2	3			0.659241			0.666667	1.5			FALSE	FALSE	FALSE	FALSE	FALSE	FALSE
Rab GDP dissociation inhibitor beta OS=Mus musculus GN=Gdi2 PE=1 SV=1	Gdi2	GDIB_MOUSE	51 kDa			2	2	4	2	3			0.778801			1	1.5			FALSE	FALSE	TRUE	FALSE	FALSE	FALSE
Probable ATP-dependent RNA helicase DDX5 OS=Mus musculus GN=Ddx5 PE=1 SV=2	Ddx5	DDX5_MOUSE	69 kDa			3	2	4	3	4			0.367879			1	2			FALSE	TRUE	FALSE	FALSE	FALSE	FALSE
60S ribosomal protein L21 OS=Mus musculus GN=Rpl21 PE=2 SV=3	Rpl21	RL21_MOUSE	19 kDa			5	2	4	4		3		0.798516			0.8		0.75		FALSE	FALSE	FALSE	FALSE	FALSE	FALSE
Actin-related protein 2 OS=Mus musculus GN=Actr2 PE=1 SV=1	Actr2	ARP2_MOUSE	45 kDa			2	2	3	4				0.367879			2				FALSE	FALSE	FALSE	FALSE	FALSE	TRUE
DNA replication licensing factor MCM5 OS=Mus musculus GN=Mcm5 PE=2 SV=1	Mcm5	MCM5_MOUSE	82 kDa			4	4	5	3				0.882497			0.75				FALSE	FALSE	FALSE	FALSE	FALSE	FALSE
Hsc70-interacting protein OS=Mus musculus GN=St13 PE=1 SV=1	St13	F10A1_MOUSE	42 kDa			6	2	5	5				0.920044			0.833333				FALSE	FALSE	FALSE	FALSE	FALSE	FALSE
Epiplakin OS=Mus musculus GN=Eppk1 PE=1 SV=2	Eppk1	EPIPL_MOUSE	725 kDa			3	2	3	2	3			0.659241			0.666667	1.5			FALSE	FALSE	FALSE	FALSE	FALSE	FALSE
Kinesin-1 heavy chain OS=Mus musculus GN=Kif5b PE=1 SV=3	Kif5b	KINH_MOUSE	110 kDa			4		3		2			1							FALSE	FALSE	FALSE	FALSE	TRUE	FALSE
DNA damage-binding protein 1 OS=Mus musculus GN=Ddb1 PE=1 SV=2	Ddb1	DDB1_MOUSE	127 kDa			4	4	3	3	3			0.778801			0.75	0.75			FALSE	FALSE	FALSE	FALSE	FALSE	FALSE
Structural maintenance of chromosomes protein 2 OS=Mus musculus GN=Smc2 PE=1 SV=2	Smc2	SMC2_MOUSE	134 kDa			4	2	3	3				0.882497			0.75				FALSE	FALSE	FALSE	FALSE	FALSE	FALSE
Complement component 1 Q subcomponent-binding protein, mitochondrial OS=Mus musculus GN=C1qbp PE=1 SV=1	C1qbp	C1QBP_MOUSE	31 kDa			3	2		4	2	3		0.846482			1.33333	1			FALSE	TRUE	FALSE	FALSE	FALSE	FALSE
ATP synthase subunit gamma, mitochondrial OS=Mus musculus GN=Atp5c1 PE=1 SV=1	Atp5c1	ATPG_MOUSE	33 kDa			3	3	5	5	2			0.434598			1.66667	0.666667			FALSE	FALSE	FALSE	FALSE	FALSE	FALSE
Importin subunit beta-1 OS=Mus musculus GN=Kpnb1 PE=1 SV=2	Kpnb1	IMB1_MOUSE	97 kDa			7		4	3		2		0.193427			0.428571		0.5		FALSE	FALSE	FALSE	FALSE	FALSE	FALSE
Centrosomal protein of 290 kDa OS=Mus musculus GN=Cep290 PE=1 SV=2	Cep290	CE290_MOUSE	289 kDa								2									FALSE	FALSE	FALSE	FALSE	FALSE	FALSE
Coatomer subunit alpha OS=Mus musculus GN=Copa PE=1 SV=2	Copa	COPA_MOUSE	138 kDa			6		2	4	2			0.716531			0.666667				FALSE	FALSE	TRUE	FALSE	FALSE	FALSE
Serpin B6 OS=Mus musculus GN=Serpinb6 PE=1 SV=1	Serpinb6	SPB6_MOUSE	43 kDa			3		3			2		0.846482					0.666667		FALSE	FALSE	FALSE	FALSE	FALSE	FALSE
Elongator complex protein 1 OS=Mus musculus GN=Ikbkap PE=1 SV=2	Ikbkap	ELP1_MOUSE	150 kDa			3	2	3	5		3		0.513417			1.66667		1		FALSE	FALSE	FALSE	FALSE	FALSE	FALSE
Bifunctional purine biosynthesis protein PURH OS=Mus musculus GN=Atic PE=1 SV=2	Atic	PUR9_MOUSE	64 kDa			6		4	6				1			1				TRUE	FALSE	FALSE	FALSE	FALSE	FALSE
Pre-mRNA-processing factor 40 homolog A OS=Mus musculus GN=Prpf40a PE=1 SV=1	Prpf40a	PR40A_MOUSE	108 kDa			5	2	2		2	2		1				1	1		FALSE	TRUE	FALSE	FALSE	FALSE	FALSE
40S ribosomal protein S2 OS=Mus musculus GN=Rps2 PE=2 SV=3	Rps2	RS2_MOUSE	31 kDa			2	3	3	3	2	3		0.659241			1.5	0.666667	1		TRUE	FALSE	FALSE	FALSE	FALSE	FALSE
2-oxoglutarate dehydrogenase, mitochondrial OS=Mus musculus GN=Ogdh PE=1 SV=3	Ogdh	ODO1_MOUSE	116 kDa			2	2	2	3		2		0.778801			1.5		1		FALSE	FALSE	FALSE	FALSE	FALSE	FALSE
6-phosphogluconate dehydrogenase, decarboxylating OS=Mus musculus GN=Pgd PE=1 SV=3	Pgd	6PGD_MOUSE	53 kDa			5	2	2	4	2			0.904837			0.8	1			FALSE	FALSE	FALSE	FALSE	FALSE	FALSE
Microtubule-associated protein 1B OS=Mus musculus GN=Map1b PE=1 SV=2	Map1b	MAP1B_MOUSE	270 kDa			4	2	3	2	2	2		0.513417			0.5	1	0.666667		FALSE	FALSE	FALSE	FALSE	TRUE	FALSE
Lamina-associated polypeptide 2, isoforms beta/delta/epsilon/gamma OS=Mus musculus GN=Tmpo PE=1 SV=4	Tmpo	LAP2B_MOUSE	50 kDa			7	2	3	3		3		0.318907			0.428571		1		TRUE	FALSE	FALSE	FALSE	FALSE	FALSE
Elongation factor 1-delta OS=Mus musculus GN=Eef1d PE=1 SV=3	Eef1d	EF1D_MOUSE	31 kDa			4		4	5	2	2		0.535261			1.25		0.5		TRUE	FALSE	FALSE	FALSE	FALSE	FALSE
H-2 class I histocompatibility antigen, D-B alpha chain OS=Mus musculus GN=H2-D1 PE=1 SV=2	H2-D1	HA11_MOUSE	41 kDa			3	5	5	4	2			0.344154			1.33333	0.4			FALSE	FALSE	FALSE	FALSE	FALSE	FALSE
Transcription intermediary factor 1-beta OS=Mus musculus GN=Trim28 PE=1 SV=3	Trim28	TIF1B_MOUSE	89 kDa			5	2	3	4	2	2		0.765928			0.8	1	0.666667		FALSE	FALSE	FALSE	FALSE	FALSE	FALSE
Histone-binding protein RBBP7 OS=Mus musculus GN=Rbbp7 PE=1 SV=1	Rbbp7	RBBP7_MOUSE	48 kDa			5	5	2	3	4			0.606531			0.6	0.8			FALSE	FALSE	FALSE	FALSE	FALSE	FALSE
AP-2 complex subunit alpha-2 OS=Mus musculus GN=Ap2a2 PE=1 SV=2	Ap2a2	AP2A2_MOUSE	104 kDa			2	3	3			3		1					1		FALSE	FALSE	TRUE	FALSE	FALSE	FALSE
Methionine--tRNA ligase, cytoplasmic OS=Mus musculus GN=Mars PE=2 SV=1	Mars	SYMC_MOUSE	101 kDa			3	3		4	2			0.716531			1.33333	0.666667			FALSE	FALSE	FALSE	FALSE	FALSE	FALSE
Calponin-3 OS=Mus musculus GN=Cnn3 PE=1 SV=1	Cnn3	CNN3_MOUSE	36 kDa			5	2	2	4				0.904837			0.8				TRUE	FALSE	FALSE	FALSE	FALSE	FALSE
Structural maintenance of chromosomes protein 4 OS=Mus musculus GN=Smc4 PE=1 SV=1	Smc4	SMC4_MOUSE	147 kDa			3	2	3	2				0.846482			0.666667				FALSE	FALSE	FALSE	FALSE	FALSE	FALSE
Guanine nucleotide-binding protein G(I)/G(S)/G(T) subunit beta-1 OS=Mus musculus GN=Gnb1 PE=1 SV=3	Gnb1	GBB1_MOUSE	37 kDa			3	3	3	3	2	2		0.716531			1	0.666667	0.666667		FALSE	FALSE	FALSE	FALSE	FALSE	FALSE
60S ribosomal protein L19 OS=Mus musculus GN=Rpl19 PE=1 SV=1	Rpl19	RL19_MOUSE	23 kDa			3	2	2	2	4	2		0.311403			0.666667	2	1		FALSE	FALSE	FALSE	FALSE	FALSE	FALSE
Clathrin light chain A OS=Mus musculus GN=Clta PE=1 SV=2	Clta	CLCA_MOUSE	26 kDa			3	4	3	3	2	2		0.513417			1	0.5	0.666667		FALSE	FALSE	TRUE	FALSE	FALSE	FALSE
Protein-L-isoaspartate O-methyltransferase domain-containing protein 2 OS=Mus musculus GN=Pcmtd2 PE=2 SV=1	Pcmtd2	PCMD2_MOUSE	41 kDa			3	3	3	3		2		0.846482			1		0.666667		FALSE	FALSE	FALSE	FALSE	FALSE	FALSE
Actin, alpha cardiac muscle 1 OS=Mus musculus GN=Actc1 PE=1 SV=1	Actc1	ACTC_MOUSE	42 kDa			2														FALSE	FALSE	FALSE	FALSE	FALSE	FALSE
Ezrin OS=Mus musculus GN=Ezr PE=1 SV=3	Ezr	EZRI_MOUSE	69 kDa			6	4	2	2				0.263597			0.333333				FALSE	FALSE	FALSE	FALSE	FALSE	FALSE
E2F-associated phosphoprotein OS=Mus musculus GN=Eapp PE=1 SV=2	Eapp	EAPP_MOUSE	32 kDa			2														FALSE	FALSE	FALSE	FALSE	FALSE	FALSE
Catenin alpha-1 OS=Mus musculus GN=Ctnna1 PE=1 SV=1	Ctnna1	CTNA1_MOUSE	100 kDa			4		2	3				0.882497			0.75				FALSE	FALSE	FALSE	FALSE	FALSE	FALSE
Ran-specific GTPase-activating protein OS=Mus musculus GN=Ranbp1 PE=1 SV=2	Ranbp1	RANG_MOUSE	24 kDa			3	4	2	4	4			0.846482			1.33333	1			FALSE	FALSE	FALSE	TRUE	FALSE	FALSE
Protein disulfide-isomerase A4 OS=Mus musculus GN=Pdia4 PE=1 SV=3	Pdia4	PDIA4_MOUSE	72 kDa			4	3	3	7				0.324652			1.75				FALSE	FALSE	FALSE	FALSE	FALSE	FALSE
26S protease regulatory subunit 8 OS=Mus musculus GN=Psmc5 PE=1 SV=1	Psmc5	PRS8_MOUSE	46 kDa			3	2	5	4				0.846482			1.33333				FALSE	FALSE	FALSE	FALSE	FALSE	FALSE
Calreticulin OS=Mus musculus GN=Calr PE=1 SV=1	Calr	CALR_MOUSE	48 kDa			5	2		4				0.904837			0.8				FALSE	FALSE	FALSE	FALSE	FALSE	FALSE
S-formylglutathione hydrolase OS=Mus musculus GN=Esd PE=1 SV=1	Esd	ESTD_MOUSE	31 kDa			3		4	3	2	2		0.606531			1		0.5		FALSE	FALSE	FALSE	FALSE	FALSE	FALSE
BAG family molecular chaperone regulator 2 OS=Mus musculus GN=Bag2 PE=1 SV=1	Bag2	BAG2_MOUSE	23 kDa					3	2				1							FALSE	FALSE	FALSE	FALSE	FALSE	FALSE
60S ribosomal protein L17 OS=Mus musculus GN=Rpl17 PE=2 SV=3	Rpl17	RL17_MOUSE	21 kDa			3	2	5	3		2		0.40657			1		0.4		FALSE	FALSE	FALSE	FALSE	FALSE	FALSE
RuvB-like 2 OS=Mus musculus GN=Ruvbl2 PE=2 SV=3	Ruvbl2	RUVB2_MOUSE	51 kDa			5	4	2	4		3		0.704688			0.8		1.5		FALSE	FALSE	FALSE	FALSE	FALSE	FALSE
26S protease regulatory subunit 6A OS=Mus musculus GN=Psmc3 PE=1 SV=2	Psmc3	PRS6A_MOUSE	50 kDa			5	2	3	3				0.67032			0.6				FALSE	FALSE	FALSE	FALSE	FALSE	FALSE
Ral guanine nucleotide dissociation stimulator-like 3 OS=Mus musculus GN=Rgl3 PE=1 SV=2	Rgl3	RGL3_MOUSE	78 kDa			3	3	3	4		4		0.716531			1.33333		1.33333		FALSE	FALSE	FALSE	FALSE	FALSE	FALSE
40S ribosomal protein S5 OS=Mus musculus GN=Rps5 PE=1 SV=3	Rps5	RS5_MOUSE	23 kDa			3		3		2	2		0.846482					0.666667		FALSE	FALSE	FALSE	FALSE	FALSE	FALSE
Eukaryotic translation initiation factor 2 subunit 3, X-linked OS=Mus musculus GN=Eif2s3x PE=1 SV=2	Eif2s3x	IF2G_MOUSE	51 kDa			2		2		5			1							TRUE	FALSE	FALSE	FALSE	FALSE	FALSE
60S ribosomal protein L24 OS=Mus musculus GN=Rpl24 PE=1 SV=2	Rpl24	RL24_MOUSE	18 kDa				2	4		2	2		0.606531				1	0.5		FALSE	FALSE	FALSE	FALSE	FALSE	FALSE
Interferon-induced guanylate-binding protein 2 OS=Mus musculus GN=Gbp2 PE=1 SV=1	Gbp2	GBP2_MOUSE	67 kDa			5	2	4	2				0.40657			0.4				FALSE	FALSE	FALSE	FALSE	FALSE	FALSE
Myosin-IIIa OS=Mus musculus GN=Myo3a PE=2 SV=1	Myo3a	MYO3A_MOUSE	185 kDa			2		2	2		2		1			1		1		FALSE	FALSE	FALSE	FALSE	FALSE	FALSE
eIF-2-alpha kinase activator GCN1 OS=Mus musculus OX=10090 GN=Gcn1 PE=1 SV=1	Gcn1	GCN1_MOUSE	?			3		2	3				1			1				FALSE	FALSE	FALSE	FALSE	FALSE	FALSE
Nucleolin OS=Mus musculus GN=Ncl PE=1 SV=2	Ncl	NUCL_MOUSE	77 kDa			4	2	4												FALSE	FALSE	FALSE	FALSE	FALSE	FALSE
Protein disulfide-isomerase A3 OS=Mus musculus GN=Pdia3 PE=1 SV=2	Pdia3	PDIA3_MOUSE	57 kDa			6	2	2	6	2			1			1	1			FALSE	FALSE	FALSE	FALSE	FALSE	FALSE
Angiopoietin-related protein 3 OS=Mus musculus GN=Angptl3 PE=2 SV=1	Angptl3	ANGL3_MOUSE	53 kDa				2													FALSE	FALSE	FALSE	FALSE	FALSE	FALSE
Dihydrolipoyl dehydrogenase, mitochondrial OS=Mus musculus GN=Dld PE=1 SV=2	Dld	DLDH_MOUSE	54 kDa			3	3	2	5				0.513417			1.66667				FALSE	FALSE	FALSE	FALSE	FALSE	FALSE
ATP synthase subunit O, mitochondrial OS=Mus musculus GN=Atp5o PE=1 SV=1	Atp5o	ATPO_MOUSE	23 kDa			3	2	4	3	4	2		0.22313			1	2	0.5		FALSE	FALSE	FALSE	FALSE	FALSE	FALSE
26S proteasome non-ATPase regulatory subunit 4 OS=Mus musculus GN=Psmd4 PE=1 SV=1	Psmd4	PSMD4_MOUSE	41 kDa			4	3	3	3	2	2		0.632337			0.75	0.666667	0.666667		FALSE	FALSE	FALSE	TRUE	FALSE	FALSE
Dolichyl-diphosphooligosaccharide--protein glycosyltransferase 48 kDa subunit OS=Mus musculus GN=Ddost PE=1 SV=2	Ddost	OST48_MOUSE	49 kDa			3	4	4	4	2	3		0.453089			1.33333	0.5	0.75		FALSE	FALSE	FALSE	FALSE	FALSE	FALSE
S-adenosylmethionine synthase isoform type-2 OS=Mus musculus GN=Mat2a PE=2 SV=2	Mat2a	METK2_MOUSE	44 kDa			4	2	4	2	2	2		0.367879			0.5	1	0.5		FALSE	FALSE	FALSE	FALSE	FALSE	FALSE
Hexokinase-1 OS=Mus musculus GN=Hk1 PE=1 SV=3	Hk1	HXK1_MOUSE	108 kDa			2	3	4	3		2		0.472367			1.5		0.5		FALSE	FALSE	FALSE	FALSE	FALSE	FALSE
Adenosylhomocysteinase OS=Mus musculus GN=Ahcy PE=1 SV=3	Ahcy	SAHH_MOUSE	48 kDa			5	3	3	2	2			0.344154			0.4	0.666667			FALSE	FALSE	FALSE	FALSE	FALSE	FALSE
Heterogeneous nuclear ribonucleoprotein A1 OS=Mus musculus GN=Hnrnpa1 PE=1 SV=2	Hnrnpa1	ROA1_MOUSE	34 kDa			6		2	2	2			0.263597			0.333333				FALSE	TRUE	FALSE	FALSE	FALSE	FALSE
Eukaryotic peptide chain release factor subunit 1 OS=Mus musculus GN=Etf1 PE=1 SV=4	Etf1	ERF1_MOUSE	49 kDa			5	2	2	2	3			0.316637			0.4	1.5			FALSE	FALSE	FALSE	FALSE	FALSE	FALSE
Aspartate aminotransferase, mitochondrial OS=Mus musculus GN=Got2 PE=1 SV=1	Got2	AATM_MOUSE	47 kDa			5		2	4				0.904837			0.8				FALSE	FALSE	FALSE	FALSE	FALSE	FALSE
Vacuolar protein sorting-associated protein 35 OS=Mus musculus GN=Vps35 PE=1 SV=1	Vps35	VPS35_MOUSE	92 kDa			3														FALSE	FALSE	FALSE	FALSE	FALSE	FALSE
Eukaryotic translation initiation factor 3 subunit F OS=Mus musculus GN=Eif3f PE=1 SV=2	Eif3f	EIF3F_MOUSE	38 kDa			4	2		5	3			0.687289			1.25	1.5			FALSE	FALSE	FALSE	FALSE	FALSE	FALSE
Glutamate dehydrogenase 1, mitochondrial OS=Mus musculus GN=Glud1 PE=1 SV=1	Glud1	DHE3_MOUSE	61 kDa			4	2		6				0.606531			1.5				FALSE	FALSE	FALSE	FALSE	FALSE	FALSE
Very long-chain specific acyl-CoA dehydrogenase, mitochondrial OS=Mus musculus GN=Acadvl PE=1 SV=3	Acadvl	ACADV_MOUSE	71 kDa			5	3	4	2				0.40657			0.4				FALSE	FALSE	FALSE	FALSE	FALSE	FALSE
Dystonin OS=Mus musculus GN=Dst PE=1 SV=2	Dst	DYST_MOUSE	834 kDa							2										FALSE	FALSE	FALSE	FALSE	FALSE	FALSE
Protein phosphatase 1G OS=Mus musculus GN=Ppm1g PE=1 SV=3	Ppm1g	PPM1G_MOUSE	59 kDa			2			2				1			1				FALSE	FALSE	FALSE	FALSE	FALSE	FALSE
Tubulin beta-2A chain OS=Mus musculus GN=Tubb2a PE=1 SV=1	Tubb2a	TBB2A_MOUSE	50 kDa			3		4	3		3		0.882497			1		0.75		FALSE	FALSE	FALSE	FALSE	TRUE	FALSE
60S ribosomal protein L11 OS=Mus musculus GN=Rpl11 PE=1 SV=4	Rpl11	RL11_MOUSE	20 kDa			3	3	3	2	3	2		0.716531			0.666667	1	0.666667		FALSE	FALSE	FALSE	FALSE	FALSE	FALSE
ADP-sugar pyrophosphatase OS=Mus musculus GN=Nudt5 PE=1 SV=1	Nudt5	NUDT5_MOUSE	24 kDa			3	2	3	3		2		0.846482			1		0.666667		FALSE	FALSE	FALSE	FALSE	FALSE	FALSE
Peroxiredoxin-2 OS=Mus musculus GN=Prdx2 PE=1 SV=3	Prdx2	PRDX2_MOUSE	22 kDa			3	4	2	3		2		1			1		1		FALSE	FALSE	FALSE	FALSE	FALSE	FALSE
Ubiquitin-associated protein 2-like OS=Mus musculus GN=Ubap2l PE=1 SV=1	Ubap2l	UBP2L_MOUSE	117 kDa				3	2	2	2			0.846482				0.666667			FALSE	FALSE	FALSE	FALSE	FALSE	FALSE
Galectin-3-binding protein OS=Mus musculus GN=Lgals3bp PE=1 SV=1	Lgals3bp	LG3BP_MOUSE	64 kDa				2	2	3	3			0.778801				1.5			FALSE	FALSE	FALSE	FALSE	FALSE	FALSE
Actin-related protein 2/3 complex subunit 1B OS=Mus musculus GN=Arpc1b PE=2 SV=4	Arpc1b	ARC1B_MOUSE	41 kDa			2			2				1			1				FALSE	FALSE	FALSE	FALSE	FALSE	FALSE
DAZ-associated protein 1 OS=Mus musculus GN=Dazap1 PE=2 SV=2	Dazap1	DAZP1_MOUSE	43 kDa			2		2		2	2		1					1		FALSE	FALSE	FALSE	FALSE	FALSE	FALSE
Proteasome subunit alpha type-3 OS=Mus musculus GN=Psma3 PE=1 SV=3	Psma3	PSA3_MOUSE	28 kDa			4	2	2	4				1			1				FALSE	FALSE	FALSE	TRUE	FALSE	FALSE
Transferrin receptor protein 1 OS=Mus musculus GN=Tfrc PE=1 SV=1	Tfrc	TFR1_MOUSE	86 kDa			4		2			2		1					1		FALSE	FALSE	FALSE	FALSE	FALSE	FALSE
Heterogeneous nuclear ribonucleoprotein U-like protein 1 OS=Mus musculus GN=Hnrnpul1 PE=1 SV=1	Hnrnpul1	HNRL1_MOUSE	96 kDa			5		3	4				0.904837			0.8				FALSE	FALSE	FALSE	FALSE	FALSE	FALSE
Coatomer subunit gamma-1 OS=Mus musculus GN=Copg1 PE=2 SV=1	Copg1	COPG1_MOUSE	98 kDa			4		3	4				1			1				FALSE	FALSE	TRUE	FALSE	FALSE	FALSE
Eukaryotic peptide chain release factor GTP-binding subunit ERF3A OS=Mus musculus GN=Gspt1 PE=1 SV=2	Gspt1	ERF3A_MOUSE	69 kDa			5	4	4	3	3			0.591555			0.6	0.75			FALSE	FALSE	FALSE	FALSE	FALSE	FALSE
Eukaryotic translation initiation factor 3 subunit M OS=Mus musculus GN=Eif3m PE=2 SV=1	Eif3m	EIF3M_MOUSE	43 kDa			3	2	2	3				1			1				FALSE	FALSE	FALSE	FALSE	FALSE	FALSE
Nascent polypeptide-associated complex subunit alpha, muscle-specific form OS=Mus musculus GN=Naca PE=1 SV=2	Naca	NACAM_MOUSE	220 kDa			2	2	2	2				1			1				FALSE	FALSE	FALSE	FALSE	FALSE	FALSE
Sciellin OS=Mus musculus GN=Scel PE=1 SV=2	Scel	SCEL_MOUSE	73 kDa					2												FALSE	FALSE	FALSE	FALSE	FALSE	FALSE
Dolichyl-diphosphooligosaccharide--protein glycosyltransferase subunit STT3A OS=Mus musculus GN=Stt3a PE=1 SV=1	Stt3a	STT3A_MOUSE	81 kDa			5	2	4	3				0.67032			0.6				FALSE	FALSE	FALSE	FALSE	FALSE	FALSE
60S ribosomal protein L23 OS=Mus musculus GN=Rpl23 PE=1 SV=1	Rpl23	RL23_MOUSE	15 kDa			3	3	4	3	2	2		0.513417			1	0.666667	0.5		FALSE	FALSE	FALSE	FALSE	FALSE	FALSE
26S proteasome non-ATPase regulatory subunit 14 OS=Mus musculus GN=Psmd14 PE=1 SV=2	Psmd14	PSDE_MOUSE	35 kDa			4	3	3	3	2	2		0.632337			0.75	0.666667	0.666667		FALSE	FALSE	FALSE	FALSE	FALSE	FALSE
Enoyl-CoA delta isomerase 1, mitochondrial OS=Mus musculus GN=Eci1 PE=1 SV=2	Eci1	ECI1_MOUSE	32 kDa			2			3	3	2		0.778801			1.5				FALSE	FALSE	FALSE	FALSE	FALSE	FALSE
Interferon-induced protein with tetratricopeptide repeats 3 OS=Mus musculus GN=Ifit3 PE=2 SV=1	Ifit3	IFIT3_MOUSE	47 kDa			3	3	2	3	2			0.846482			1	0.666667			FALSE	FALSE	FALSE	FALSE	FALSE	FALSE
Citrate synthase, mitochondrial OS=Mus musculus GN=Cs PE=1 SV=1	Cs	CISY_MOUSE	52 kDa			3	2	2	2	2			0.846482			0.666667	1			FALSE	FALSE	FALSE	FALSE	FALSE	FALSE
Cytochrome b5 type B OS=Mus musculus GN=Cyb5b PE=1 SV=1	Cyb5b	CYB5B_MOUSE	16 kDa			3	3	3	3	2			0.846482			1	0.666667			FALSE	FALSE	FALSE	FALSE	FALSE	FALSE
Macrophage migration inhibitory factor OS=Mus musculus GN=Mif PE=1 SV=2	Mif	MIF_MOUSE	13 kDa					2	3	2			1							FALSE	FALSE	FALSE	FALSE	FALSE	FALSE
DnaJ homolog subfamily A member 2 OS=Mus musculus GN=Dnaja2 PE=1 SV=1	Dnaja2	DNJA2_MOUSE	46 kDa			2	2	3	4		2		0.311403			2		0.666667		FALSE	FALSE	FALSE	FALSE	FALSE	FALSE
Sterile alpha motif domain-containing protein 9-like OS=Mus musculus GN=Samd9l PE=1 SV=2	Samd9l	SAM9L_MOUSE	180 kDa			4	2	3	2				0.606531			0.5				FALSE	FALSE	FALSE	FALSE	FALSE	FALSE
Prelamin-A/C OS=Mus musculus GN=Lmna PE=1 SV=2	Lmna	LMNA_MOUSE	74 kDa			4	2	3	2	2			0.606531			0.5	1			FALSE	FALSE	FALSE	FALSE	FALSE	FALSE
Ubiquitin-conjugating enzyme E2 L3 OS=Mus musculus GN=Ube2l3 PE=2 SV=1	Ube2l3	UB2L3_MOUSE	18 kDa			3	3	3												FALSE	FALSE	FALSE	FALSE	FALSE	FALSE
Lysine-specific demethylase 5A OS=Mus musculus GN=Kdm5a PE=1 SV=2	Kdm5a	KDM5A_MOUSE	192 kDa							3										FALSE	FALSE	FALSE	FALSE	FALSE	FALSE
Centrosomal protein of 162 kDa OS=Mus musculus GN=Cep162 PE=1 SV=2	Cep162	CE162_MOUSE	161 kDa			2		2												FALSE	FALSE	FALSE	FALSE	FALSE	FALSE
Dedicator of cytokinesis protein 7 OS=Mus musculus GN=Dock7 PE=1 SV=3	Dock7	DOCK7_MOUSE	241 kDa			2		3	3				0.778801			1.5				FALSE	FALSE	FALSE	FALSE	FALSE	FALSE
4F2 cell-surface antigen heavy chain OS=Mus musculus GN=Slc3a2 PE=1 SV=1	Slc3a2	4F2_MOUSE	58 kDa			6		2	5				0.920044			0.833333				TRUE	FALSE	FALSE	FALSE	FALSE	FALSE
Importin-9 OS=Mus musculus GN=Ipo9 PE=1 SV=3	Ipo9	IPO9_MOUSE	116 kDa			2	2	3												FALSE	FALSE	FALSE	FALSE	FALSE	FALSE
F-actin-capping protein subunit beta OS=Mus musculus GN=Capzb PE=1 SV=3	Capzb	CAPZB_MOUSE	31 kDa			4	3	2	2	2			0.513417			0.5	0.666667			TRUE	FALSE	FALSE	FALSE	FALSE	TRUE
Galectin-9 OS=Mus musculus GN=Lgals9 PE=1 SV=1	Lgals9	LEG9_MOUSE	40 kDa			2	2	3	2		3		1			1		1		FALSE	FALSE	FALSE	FALSE	FALSE	FALSE
AP-1 complex subunit sigma-1A OS=Mus musculus GN=Ap1s1 PE=1 SV=1	Ap1s1	AP1S1_MOUSE	19 kDa			2	4	2		2			0.606531				0.5			FALSE	FALSE	TRUE	FALSE	FALSE	FALSE
L-lactate dehydrogenase B chain OS=Mus musculus GN=Ldhb PE=1 SV=2	Ldhb	LDHB_MOUSE	37 kDa			3		2	3	2			1			1				FALSE	FALSE	FALSE	FALSE	FALSE	FALSE
CTP synthase 1 OS=Mus musculus GN=Ctps1 PE=1 SV=2	Ctps1	PYRG1_MOUSE	67 kDa			2		3			2		0.846482					0.666667		FALSE	FALSE	FALSE	FALSE	FALSE	FALSE
Endonuclease domain-containing 1 protein OS=Mus musculus GN=Endod1 PE=1 SV=2	Endod1	ENDD1_MOUSE	55 kDa				2	2												FALSE	FALSE	FALSE	FALSE	FALSE	FALSE
Rho GTPase-activating protein 21 OS=Mus musculus GN=Arhgap21 PE=1 SV=1	Arhgap21	RHG21_MOUSE	216 kDa			2		2		2	2		1					1		FALSE	FALSE	FALSE	FALSE	FALSE	FALSE
Succinate dehydrogenase [ubiquinone] flavoprotein subunit, mitochondrial OS=Mus musculus GN=Sdha PE=1 SV=1	Sdha	SDHA_MOUSE	73 kDa			3	2	2	3				1			1				FALSE	FALSE	FALSE	FALSE	FALSE	FALSE
Peroxisomal multifunctional enzyme type 2 OS=Mus musculus GN=Hsd17b4 PE=1 SV=3	Hsd17b4	DHB4_MOUSE	79 kDa			5	3		3	3			0.67032			0.6	1			FALSE	FALSE	FALSE	FALSE	FALSE	FALSE
RNA-binding protein FUS OS=Mus musculus GN=Fus PE=2 SV=1	Fus	FUS_MOUSE	53 kDa			2	2	3	2	3			0.778801			1	1.5			FALSE	FALSE	FALSE	FALSE	FALSE	FALSE
Alpha-crystallin B chain OS=Mus musculus GN=Cryab PE=1 SV=2	Cryab	CRYAB_MOUSE	20 kDa			2	2	2	4	3			0.286505			2	1.5			FALSE	FALSE	FALSE	FALSE	FALSE	FALSE
UDP-glucose:glycoprotein glucosyltransferase 1 OS=Mus musculus GN=Uggt1 PE=1 SV=4	Uggt1	UGGG1_MOUSE	176 kDa			3	3	2	3				1			1				FALSE	FALSE	FALSE	FALSE	FALSE	FALSE
Ribonuclease inhibitor OS=Mus musculus GN=Rnh1 PE=1 SV=1	Rnh1	RINI_MOUSE	50 kDa			2	3	4	2				1			1				FALSE	FALSE	FALSE	FALSE	FALSE	FALSE
Protein S100-A11 OS=Mus musculus GN=S100a11 PE=1 SV=1	S100a11	S10AB_MOUSE	11 kDa			3	2	2	2	2			0.846482			0.666667	1			FALSE	FALSE	FALSE	FALSE	FALSE	FALSE
Glutamine--fructose-6-phosphate aminotransferase [isomerizing] 1 OS=Mus musculus GN=Gfpt1 PE=1 SV=3	Gfpt1	GFPT1_MOUSE	79 kDa			3		2	3				1			1				FALSE	FALSE	FALSE	FALSE	FALSE	FALSE
Farnesyl pyrophosphate synthase OS=Mus musculus GN=Fdps PE=1 SV=1	Fdps	FPPS_MOUSE	41 kDa			2		2	2	2			1			1				FALSE	FALSE	FALSE	FALSE	FALSE	FALSE
Rho GDP-dissociation inhibitor 1 OS=Mus musculus GN=Arhgdia PE=1 SV=3	Arhgdia	GDIR1_MOUSE	23 kDa			2			6		2		0.0183156			3				FALSE	FALSE	FALSE	FALSE	FALSE	FALSE
Coatomer subunit beta' OS=Mus musculus GN=Copb2 PE=2 SV=2	Copb2	COPB2_MOUSE	102 kDa			3	2													FALSE	FALSE	TRUE	FALSE	FALSE	FALSE
40S ribosomal protein S6 OS=Mus musculus GN=Rps6 PE=1 SV=1	Rps6	RS6_MOUSE	29 kDa			4	3	3		2			0.846482				0.666667			FALSE	FALSE	FALSE	FALSE	FALSE	FALSE
Serine/arginine repetitive matrix protein 2 OS=Mus musculus GN=Srrm2 PE=1 SV=3	Srrm2	SRRM2_MOUSE	295 kDa			2	3	3												FALSE	TRUE	FALSE	FALSE	FALSE	FALSE
Regulator of nonsense transcripts 1 OS=Mus musculus GN=Upf1 PE=1 SV=2	Upf1	RENT1_MOUSE	124 kDa			3	2	3												FALSE	FALSE	FALSE	FALSE	FALSE	FALSE
Rho guanine nucleotide exchange factor 2 OS=Mus musculus GN=Arhgef2 PE=1 SV=4	Arhgef2	ARHG2_MOUSE	112 kDa			5	2		3				0.67032			0.6				FALSE	FALSE	FALSE	FALSE	FALSE	FALSE
Eukaryotic translation initiation factor 3 subunit D OS=Mus musculus GN=Eif3d PE=1 SV=2	Eif3d	EIF3D_MOUSE	64 kDa			2			2				1			1				FALSE	FALSE	FALSE	FALSE	FALSE	FALSE
Coatomer subunit beta OS=Mus musculus GN=Copb1 PE=1 SV=1	Copb1	COPB_MOUSE	107 kDa			4		4	2				0.606531			0.5				FALSE	FALSE	TRUE	FALSE	FALSE	FALSE
60S ribosomal protein L14 OS=Mus musculus GN=Rpl14 PE=1 SV=3	Rpl14	RL14_MOUSE	24 kDa			3		2	3		2		1			1		1		TRUE	FALSE	FALSE	FALSE	FALSE	FALSE
Succinyl-CoA ligase [ADP/GDP-forming] subunit alpha, mitochondrial OS=Mus musculus GN=Suclg1 PE=1 SV=4	Suclg1	SUCA_MOUSE	36 kDa			2	3	2	2	2			0.846482			1	0.666667			FALSE	FALSE	FALSE	FALSE	FALSE	FALSE
Ras-related protein Rab-10 OS=Mus musculus GN=Rab10 PE=1 SV=1	Rab10	RAB10_MOUSE	23 kDa			2		2	2	2	2		1			1		1		TRUE	FALSE	TRUE	FALSE	FALSE	FALSE
Actin-related protein 2/3 complex subunit 2 OS=Mus musculus GN=Arpc2 PE=1 SV=3	Arpc2	ARPC2_MOUSE	34 kDa			2	3	2	2				1			1				FALSE	FALSE	FALSE	FALSE	FALSE	FALSE
40S ribosomal protein S15a OS=Mus musculus GN=Rps15a PE=1 SV=2	Rps15a	RS15A_MOUSE	15 kDa			2	3		2		2		1			1				FALSE	FALSE	FALSE	FALSE	FALSE	FALSE
40S ribosomal protein SA OS=Mus musculus GN=Rpsa PE=1 SV=4	Rpsa	RSSA_MOUSE	33 kDa			3	3	2	3	2			0.846482			1	0.666667			FALSE	FALSE	FALSE	FALSE	FALSE	FALSE
ATP synthase F(0) complex subunit B1, mitochondrial OS=Mus musculus GN=Atp5f1 PE=1 SV=1	Atp5f1	AT5F1_MOUSE	29 kDa				3	3												FALSE	FALSE	FALSE	FALSE	FALSE	FALSE
Thioredoxin-like protein 1 OS=Mus musculus GN=Txnl1 PE=2 SV=3	Txnl1	TXNL1_MOUSE	32 kDa			3		2	4	2			0.846482			1.33333				FALSE	FALSE	FALSE	FALSE	FALSE	FALSE
40S ribosomal protein S12 OS=Mus musculus GN=Rps12 PE=1 SV=2	Rps12	RS12_MOUSE	15 kDa			2	3	3	2				1			1				FALSE	FALSE	FALSE	FALSE	FALSE	FALSE
Integrin beta-1 OS=Mus musculus GN=Itgb1 PE=1 SV=1	Itgb1	ITB1_MOUSE	88 kDa			3			2				0.846482			0.666667				FALSE	FALSE	FALSE	FALSE	FALSE	FALSE
Chromodomain-helicase-DNA-binding protein 4 OS=Mus musculus GN=Chd4 PE=1 SV=1	Chd4	CHD4_MOUSE	218 kDa			3		2												FALSE	FALSE	FALSE	FALSE	FALSE	FALSE
Myosin regulatory light chain 12B OS=Mus musculus GN=Myl12b PE=1 SV=2	Myl12b	ML12B_MOUSE	20 kDa			2	3	2		3			1				1			FALSE	FALSE	FALSE	FALSE	FALSE	FALSE
60S acidic ribosomal protein P2 OS=Mus musculus GN=Rplp2 PE=1 SV=3	Rplp2	RLA2_MOUSE	12 kDa			3	2	2	4				0.846482			1.33333				FALSE	FALSE	FALSE	FALSE	FALSE	FALSE
Eukaryotic translation initiation factor 2 subunit 1 OS=Mus musculus GN=Eif2s1 PE=1 SV=3	Eif2s1	IF2A_MOUSE	36 kDa			4			3	3			0.882497			0.75				FALSE	FALSE	FALSE	FALSE	FALSE	FALSE
Serine/arginine-rich splicing factor 6 OS=Mus musculus GN=Srsf6 PE=1 SV=1	Srsf6	SRSF6_MOUSE	39 kDa				2	2												FALSE	TRUE	FALSE	FALSE	FALSE	FALSE
AP-2 complex subunit beta OS=Mus musculus GN=Ap2b1 PE=1 SV=1	Ap2b1	AP2B1_MOUSE	105 kDa			4	3		4				1			1				FALSE	FALSE	TRUE	FALSE	FALSE	FALSE
Voltage-dependent anion-selective channel protein 2 OS=Mus musculus GN=Vdac2 PE=1 SV=2	Vdac2	VDAC2_MOUSE	32 kDa			3	2	3	2				0.846482			0.666667				FALSE	FALSE	FALSE	FALSE	FALSE	FALSE
ATP synthase subunit d, mitochondrial OS=Mus musculus GN=Atp5h PE=1 SV=3	Atp5h	ATP5H_MOUSE	19 kDa			2	2	2												FALSE	FALSE	FALSE	FALSE	FALSE	FALSE
Tripeptidyl-peptidase 2 OS=Mus musculus GN=Tpp2 PE=1 SV=3	Tpp2	TPP2_MOUSE	140 kDa			4														FALSE	FALSE	FALSE	FALSE	FALSE	FALSE
Pyrroline-5-carboxylate reductase 2 OS=Mus musculus GN=Pycr2 PE=2 SV=1	Pycr2	P5CR2_MOUSE	34 kDa			3	2	3	2				0.846482			0.666667				FALSE	FALSE	FALSE	FALSE	FALSE	FALSE
Leucine-rich PPR motif-containing protein, mitochondrial OS=Mus musculus GN=Lrpprc PE=1 SV=2	Lrpprc	LPPRC_MOUSE	157 kDa			2		2												FALSE	FALSE	FALSE	FALSE	FALSE	FALSE
Casein kinase II subunit alpha OS=Mus musculus GN=Csnk2a1 PE=1 SV=2	Csnk2a1	CSK21_MOUSE	45 kDa			3		2	4				0.846482			1.33333				FALSE	FALSE	FALSE	FALSE	FALSE	FALSE
Galactokinase OS=Mus musculus GN=Galk1 PE=2 SV=2	Galk1	GALK1_MOUSE	42 kDa			5		4	4				0.904837			0.8				FALSE	FALSE	FALSE	FALSE	FALSE	FALSE
N-alpha-acetyltransferase 50 OS=Mus musculus GN=Naa50 PE=1 SV=1	Naa50	NAA50_MOUSE	19 kDa				2		4	4			0.367879				2			FALSE	FALSE	FALSE	FALSE	FALSE	FALSE
Transcription regulator protein BACH1 OS=Mus musculus GN=Bach1 PE=1 SV=1	Bach1	BACH1_MOUSE	81 kDa							2										FALSE	FALSE	FALSE	FALSE	FALSE	FALSE
Cullin-associated NEDD8-dissociated protein 1 OS=Mus musculus GN=Cand1 PE=2 SV=2	Cand1	CAND1_MOUSE	136 kDa			2			4				0.367879			2				FALSE	FALSE	FALSE	FALSE	FALSE	FALSE
Dolichyl-diphosphooligosaccharide--protein glycosyltransferase subunit 2 OS=Mus musculus GN=Rpn2 PE=2 SV=1	Rpn2	RPN2_MOUSE	69 kDa			3	2	2	2	2			0.846482			0.666667	1			FALSE	FALSE	FALSE	FALSE	FALSE	FALSE
Bifunctional 3'-phosphoadenosine 5'-phosphosulfate synthase 1 OS=Mus musculus GN=Papss1 PE=1 SV=1	Papss1	PAPS1_MOUSE	71 kDa			3	2	2	3				1			1				FALSE	FALSE	FALSE	FALSE	FALSE	FALSE
Cysteine and glycine-rich protein 1 OS=Mus musculus GN=Csrp1 PE=1 SV=3	Csrp1	CSRP1_MOUSE	21 kDa					3												FALSE	FALSE	FALSE	FALSE	FALSE	TRUE
Ubiquitin-conjugating enzyme E2 K OS=Mus musculus GN=Ube2k PE=1 SV=3	Ube2k	UBE2K_MOUSE	22 kDa			4	2	2	4	2			1			1	1			FALSE	FALSE	FALSE	FALSE	FALSE	FALSE
26S proteasome non-ATPase regulatory subunit 1 OS=Mus musculus GN=Psmd1 PE=1 SV=1	Psmd1	PSMD1_MOUSE	106 kDa			3														FALSE	FALSE	FALSE	FALSE	FALSE	FALSE
Peptidyl-prolyl cis-trans isomerase D OS=Mus musculus GN=Ppid PE=1 SV=3	Ppid	PPID_MOUSE	41 kDa						3											FALSE	FALSE	FALSE	FALSE	FALSE	FALSE
Ribonucleoside-diphosphate reductase subunit M2 OS=Mus musculus GN=Rrm2 PE=1 SV=1	Rrm2	RIR2_MOUSE	45 kDa			2		2	3		2		0.778801			1.5		1		FALSE	FALSE	FALSE	FALSE	FALSE	FALSE
Trifunctional enzyme subunit beta, mitochondrial OS=Mus musculus GN=Hadhb PE=1 SV=1	Hadhb	ECHB_MOUSE	51 kDa			2		2	4	2			0.367879			2				FALSE	FALSE	FALSE	FALSE	FALSE	FALSE
Coatomer subunit delta OS=Mus musculus GN=Arcn1 PE=1 SV=2	Arcn1	COPD_MOUSE	57 kDa			2	3	3	2				1			1				FALSE	FALSE	TRUE	FALSE	FALSE	FALSE
Proteasome subunit alpha type-6 OS=Mus musculus GN=Psma6 PE=1 SV=1	Psma6	PSA6_MOUSE	27 kDa			3	2	2	2	3			0.659241			0.666667	1.5			FALSE	FALSE	FALSE	TRUE	FALSE	FALSE
14-3-3 protein beta/alpha OS=Mus musculus GN=Ywhab PE=1 SV=3	Ywhab	1433B_MOUSE	28 kDa			2	3	2	3				0.778801			1.5				TRUE	FALSE	FALSE	FALSE	FALSE	FALSE
Transmembrane emp24 domain-containing protein 10 OS=Mus musculus GN=Tmed10 PE=2 SV=1	Tmed10	TMEDA_MOUSE	25 kDa			3	3		2				0.846482			0.666667				FALSE	FALSE	TRUE	FALSE	FALSE	FALSE
Aminoacyl tRNA synthase complex-interacting multifunctional protein 2 OS=Mus musculus GN=Aimp2 PE=1 SV=2	Aimp2	AIMP2_MOUSE	35 kDa			3		3	2				0.846482			0.666667				FALSE	FALSE	FALSE	FALSE	FALSE	FALSE
Cold shock domain-containing protein E1 OS=Mus musculus GN=Csde1 PE=2 SV=1	Csde1	CSDE1_MOUSE	89 kDa			3		2	3				1			1				FALSE	FALSE	FALSE	FALSE	FALSE	FALSE
Isocitrate dehydrogenase [NAD] subunit alpha, mitochondrial OS=Mus musculus GN=Idh3a PE=1 SV=1	Idh3a	IDH3A_MOUSE	40 kDa			2			2				1			1				FALSE	FALSE	FALSE	FALSE	FALSE	FALSE
Ubiquitin carboxyl-terminal hydrolase 14 OS=Mus musculus GN=Usp14 PE=1 SV=3	Usp14	UBP14_MOUSE	56 kDa			3	2		5				0.513417			1.66667				FALSE	FALSE	FALSE	TRUE	FALSE	FALSE
Tapasin OS=Mus musculus GN=Tapbp PE=2 SV=2	Tapbp	TPSN_MOUSE	50 kDa			3	5	3	2				0.846482			0.666667				FALSE	FALSE	FALSE	FALSE	FALSE	FALSE
Tubulin beta-6 chain OS=Mus musculus GN=Tubb6 PE=1 SV=1	Tubb6	TBB6_MOUSE	50 kDa			2	2		2				1			1				FALSE	FALSE	FALSE	FALSE	TRUE	FALSE
Septin-11 OS=Mus musculus GN=Sept11 PE=1 SV=4	40787	SEP11_MOUSE	50 kDa			3	3		4				0.846482			1.33333				FALSE	FALSE	FALSE	FALSE	FALSE	FALSE
Golgin subfamily A member 4 OS=Mus musculus GN=Golga4 PE=1 SV=2	Golga4	GOGA4_MOUSE	258 kDa			2														FALSE	FALSE	FALSE	FALSE	FALSE	FALSE
Prolyl endopeptidase OS=Mus musculus GN=Prep PE=2 SV=1	Prep	PPCE_MOUSE	81 kDa			2		3	2				1			1				FALSE	FALSE	FALSE	FALSE	FALSE	FALSE
E3 ubiquitin-protein ligase HERC2 OS=Mus musculus GN=Herc2 PE=1 SV=3	Herc2	HERC2_MOUSE	527 kDa					2												FALSE	FALSE	FALSE	FALSE	FALSE	FALSE
60S ribosomal protein L38 OS=Mus musculus GN=Rpl38 PE=2 SV=3	Rpl38	RL38_MOUSE	8 kDa			2	2	2	2	2			1			1	1			FALSE	FALSE	FALSE	FALSE	FALSE	FALSE
Inositol monophosphatase 1 OS=Mus musculus GN=Impa1 PE=1 SV=1	Impa1	IMPA1_MOUSE	30 kDa			3	2	2	2	2			0.846482			0.666667	1			FALSE	FALSE	FALSE	FALSE	FALSE	FALSE
Condensin complex subunit 2 OS=Mus musculus GN=Ncaph PE=2 SV=1	Ncaph	CND2_MOUSE	82 kDa			2	2													FALSE	FALSE	FALSE	FALSE	FALSE	FALSE
Protein transport protein Sec31A OS=Mus musculus GN=Sec31a PE=1 SV=2	Sec31a	SC31A_MOUSE	134 kDa			3			2				0.846482			0.666667				FALSE	FALSE	TRUE	FALSE	FALSE	FALSE
Forkhead box protein P4 OS=Mus musculus GN=Foxp4 PE=1 SV=1	Foxp4	FOXP4_MOUSE	86 kDa					2	2				1							FALSE	FALSE	FALSE	FALSE	FALSE	FALSE
60S ribosomal protein L7a OS=Mus musculus GN=Rpl7a PE=1 SV=2	Rpl7a	RL7A_MOUSE	30 kDa			2		2			2		1					1		TRUE	FALSE	FALSE	FALSE	FALSE	FALSE
60S ribosomal protein L37a OS=Mus musculus GN=Rpl37a PE=2 SV=2	Rpl37a	RL37A_MOUSE	10 kDa							2										FALSE	FALSE	FALSE	FALSE	FALSE	FALSE
Phosphoenolpyruvate carboxykinase [GTP], mitochondrial OS=Mus musculus GN=Pck2 PE=1 SV=1	Pck2	PCKGM_MOUSE	71 kDa			4		2		2			1							FALSE	FALSE	FALSE	FALSE	FALSE	FALSE
Transgelin-2 OS=Mus musculus GN=Tagln2 PE=1 SV=4	Tagln2	TAGL2_MOUSE	22 kDa			3	2	2												TRUE	FALSE	FALSE	FALSE	FALSE	FALSE
Dynamin-1-like protein OS=Mus musculus GN=Dnm1l PE=1 SV=2	Dnm1l	DNM1L_MOUSE	83 kDa			2	3	2	2	3			1			1	1			FALSE	FALSE	FALSE	FALSE	FALSE	FALSE
Coronin-1B OS=Mus musculus GN=Coro1b PE=1 SV=1	Coro1b	COR1B_MOUSE	54 kDa			3		2	3				1			1				FALSE	FALSE	FALSE	FALSE	FALSE	TRUE
Pyruvate dehydrogenase E1 component subunit beta, mitochondrial OS=Mus musculus GN=Pdhb PE=1 SV=1	Pdhb	ODPB_MOUSE	39 kDa			3		2	3				1			1				FALSE	FALSE	FALSE	FALSE	FALSE	FALSE
Protein arginine N-methyltransferase 1 OS=Mus musculus GN=Prmt1 PE=1 SV=1	Prmt1	ANM1_MOUSE	42 kDa			3		2	3	2			1			1				FALSE	FALSE	FALSE	FALSE	FALSE	FALSE
Annexin A6 OS=Mus musculus GN=Anxa6 PE=1 SV=3	Anxa6	ANXA6_MOUSE	76 kDa			3		2	3				1			1				FALSE	FALSE	FALSE	FALSE	FALSE	FALSE
Protein diaphanous homolog 1 OS=Mus musculus GN=Diaph1 PE=1 SV=1	Diaph1	DIAP1_MOUSE	139 kDa						2											FALSE	FALSE	FALSE	FALSE	FALSE	TRUE
Poly(U)-binding-splicing factor PUF60 OS=Mus musculus GN=Puf60 PE=2 SV=2	Puf60	PUF60_MOUSE	60 kDa			2														TRUE	TRUE	FALSE	FALSE	FALSE	FALSE
Heat shock-related 70 kDa protein 2 OS=Mus musculus GN=Hspa2 PE=1 SV=2	Hspa2	HSP72_MOUSE	70 kDa			2	2	2	3				0.778801			1.5				FALSE	FALSE	FALSE	FALSE	FALSE	FALSE
Gelsolin OS=Mus musculus GN=Gsn PE=1 SV=3	Gsn	GELS_MOUSE	86 kDa			3			4				0.846482			1.33333				FALSE	FALSE	TRUE	FALSE	FALSE	FALSE
Nuclear autoantigenic sperm protein OS=Mus musculus GN=Nasp PE=1 SV=2	Nasp	NASP_MOUSE	84 kDa			3		2												FALSE	FALSE	FALSE	FALSE	FALSE	FALSE
Protein S100-A10 OS=Mus musculus GN=S100a10 PE=1 SV=2	S100a10	S10AA_MOUSE	11 kDa			2	2	2	2				1			1				FALSE	FALSE	FALSE	FALSE	FALSE	FALSE
KH domain-containing, RNA-binding, signal transduction-associated protein 1 OS=Mus musculus GN=Khdrbs1 PE=1 SV=2	Khdrbs1	KHDR1_MOUSE	48 kDa			2		2	2	2			1			1				FALSE	FALSE	FALSE	FALSE	FALSE	FALSE
Chloride intracellular channel protein 4 OS=Mus musculus GN=Clic4 PE=1 SV=3	Clic4	CLIC4_MOUSE	29 kDa			2	2	2	2		2		1			1		1		FALSE	FALSE	FALSE	FALSE	FALSE	FALSE
Cytochrome c oxidase subunit 2 OS=Mus musculus GN=Mtco2 PE=1 SV=1	Mtco2	COX2_MOUSE	26 kDa			2			2		2		1			1				FALSE	FALSE	FALSE	FALSE	FALSE	FALSE
Ubiquitin-conjugating enzyme E2 N OS=Mus musculus GN=Ube2n PE=1 SV=1	Ube2n	UBE2N_MOUSE	17 kDa			3			3	2			1			1				FALSE	FALSE	FALSE	TRUE	FALSE	FALSE
60S ribosomal protein L13a OS=Mus musculus GN=Rpl13a PE=1 SV=4	Rpl13a	RL13A_MOUSE	23 kDa			4		3		2			1							FALSE	FALSE	FALSE	FALSE	FALSE	FALSE
Complement C1q subcomponent subunit C OS=Mus musculus GN=C1qc PE=2 SV=2	C1qc	C1QC_MOUSE	26 kDa								2									FALSE	FALSE	FALSE	FALSE	FALSE	FALSE
AP-1 complex subunit gamma-1 OS=Mus musculus GN=Ap1g1 PE=1 SV=3	Ap1g1	AP1G1_MOUSE	91 kDa			2	2		3				0.778801			1.5				FALSE	FALSE	TRUE	FALSE	FALSE	FALSE
Beta-centractin OS=Mus musculus GN=Actr1b PE=1 SV=1	Actr1b	ACTY_MOUSE	42 kDa			3	2	2	2				0.846482			0.666667				FALSE	FALSE	FALSE	FALSE	FALSE	FALSE
Lamin-B receptor OS=Mus musculus GN=Lbr PE=1 SV=2	Lbr	LBR_MOUSE	71 kDa			2			2	2	2		1			1				FALSE	FALSE	FALSE	FALSE	FALSE	FALSE
Pyruvate carboxylase, mitochondrial OS=Mus musculus GN=Pc PE=1 SV=1	Pc	PYC_MOUSE	130 kDa			2	2	2												FALSE	FALSE	FALSE	FALSE	FALSE	FALSE
Na(+)/H(+) exchange regulatory cofactor NHE-RF1 OS=Mus musculus GN=Slc9a3r1 PE=1 SV=3	Slc9a3r1	NHRF1_MOUSE	39 kDa			2	2	2	3				0.778801			1.5				FALSE	FALSE	FALSE	FALSE	FALSE	TRUE
Calcyclin-binding protein OS=Mus musculus GN=Cacybp PE=1 SV=1	Cacybp	CYBP_MOUSE	27 kDa				2		3				1							FALSE	FALSE	FALSE	FALSE	FALSE	FALSE
Forkhead-associated domain-containing protein 1 OS=Mus musculus GN=Fhad1 PE=2 SV=1	Fhad1	FHAD1_MOUSE	164 kDa						2											FALSE	FALSE	FALSE	FALSE	FALSE	FALSE
RAB11-binding protein RELCH OS=Mus musculus OX=10090 GN=Relch PE=1 SV=1	Relch	RELCH_MOUSE	?			2		2	2				1			1				FALSE	FALSE	FALSE	FALSE	FALSE	FALSE
Tyrosine-protein phosphatase non-receptor type 13 OS=Mus musculus GN=Ptpn13 PE=1 SV=2	Ptpn13	PTN13_MOUSE	270 kDa					2	2	2			1							FALSE	FALSE	FALSE	FALSE	FALSE	FALSE
Leukotriene A-4 hydrolase OS=Mus musculus GN=Lta4h PE=1 SV=4	Lta4h	LKHA4_MOUSE	69 kDa			5		2	3				0.67032			0.6				FALSE	FALSE	FALSE	FALSE	FALSE	FALSE
Glucose-6-phosphate isomerase OS=Mus musculus GN=Gpi PE=1 SV=4	Gpi	G6PI_MOUSE	63 kDa			4			5				0.882497			1.25				FALSE	FALSE	FALSE	FALSE	FALSE	FALSE
Adenylosuccinate synthetase isozyme 2 OS=Mus musculus GN=Adss PE=1 SV=2	Adss	PURA2_MOUSE	50 kDa			6														FALSE	FALSE	FALSE	FALSE	FALSE	FALSE
Heterogeneous nuclear ribonucleoprotein H OS=Mus musculus GN=Hnrnph1 PE=1 SV=3	Hnrnph1	HNRH1_MOUSE	49 kDa			3	2	2	2	2			0.846482			0.666667	1			FALSE	TRUE	FALSE	FALSE	FALSE	FALSE
Succinyl-CoA ligase [ADP-forming] subunit beta, mitochondrial OS=Mus musculus GN=Sucla2 PE=1 SV=2	Sucla2	SUCB1_MOUSE	50 kDa				2													FALSE	FALSE	FALSE	FALSE	FALSE	FALSE
26S protease regulatory subunit 10B OS=Mus musculus GN=Psmc6 PE=1 SV=1	Psmc6	PRS10_MOUSE	44 kDa			2		2	2	2			1			1				FALSE	FALSE	FALSE	FALSE	FALSE	FALSE
Cadherin-16 OS=Mus musculus GN=Cdh16 PE=2 SV=1	Cdh16	CAD16_MOUSE	90 kDa			2	2			2	2		1				1			FALSE	FALSE	FALSE	FALSE	FALSE	FALSE
GDP-mannose 4,6 dehydratase OS=Mus musculus GN=Gmds PE=2 SV=1	Gmds	GMDS_MOUSE	42 kDa			3			2				0.846482			0.666667				FALSE	FALSE	FALSE	FALSE	FALSE	FALSE
Cadherin-1 OS=Mus musculus GN=Cdh1 PE=1 SV=1	Cdh1	CADH1_MOUSE	98 kDa			3	2	2												FALSE	FALSE	FALSE	FALSE	FALSE	FALSE
Spermidine synthase OS=Mus musculus GN=Srm PE=2 SV=1	Srm	SPEE_MOUSE	34 kDa			2	2	3	3				0.778801			1.5				FALSE	FALSE	FALSE	FALSE	FALSE	FALSE
Aminoacyl tRNA synthase complex-interacting multifunctional protein 1 OS=Mus musculus GN=Aimp1 PE=1 SV=2	Aimp1	AIMP1_MOUSE	34 kDa			2		2	2				1			1				FALSE	FALSE	FALSE	FALSE	FALSE	FALSE
Rabankyrin-5 OS=Mus musculus GN=Ankfy1 PE=2 SV=2	Ankfy1	ANFY1_MOUSE	129 kDa			2		2												FALSE	FALSE	FALSE	FALSE	FALSE	FALSE
E3 ubiquitin-protein ligase NEDD4 OS=Mus musculus GN=Nedd4 PE=1 SV=3	Nedd4	NEDD4_MOUSE	103 kDa			3			2	3			0.846482			0.666667				FALSE	FALSE	FALSE	FALSE	FALSE	FALSE
Protein broad-minded OS=Mus musculus GN=Tbc1d32 PE=1 SV=2	Tbc1d32	BROMI_MOUSE	148 kDa					2		2	2		1					1		FALSE	FALSE	FALSE	FALSE	FALSE	FALSE
DnaJ homolog subfamily C member 7 OS=Mus musculus GN=Dnajc7 PE=1 SV=2	Dnajc7	DNJC7_MOUSE	56 kDa					3												FALSE	FALSE	FALSE	FALSE	FALSE	FALSE
Dynactin subunit 1 OS=Mus musculus GN=Dctn1 PE=1 SV=3	Dctn1	DCTN1_MOUSE	142 kDa			2			3				0.778801			1.5				FALSE	FALSE	FALSE	FALSE	FALSE	FALSE
Nucleosome assembly protein 1-like 4 OS=Mus musculus GN=Nap1l4 PE=1 SV=1	Nap1l4	NP1L4_MOUSE	43 kDa			2			2				1			1				FALSE	FALSE	FALSE	FALSE	FALSE	FALSE
Phosphoribosyl pyrophosphate synthase-associated protein 1 OS=Mus musculus GN=Prpsap1 PE=1 SV=1	Prpsap1	KPRA_MOUSE	39 kDa			2		2	3				0.778801			1.5				FALSE	FALSE	FALSE	FALSE	FALSE	FALSE
Low molecular weight phosphotyrosine protein phosphatase OS=Mus musculus GN=Acp1 PE=1 SV=3	Acp1	PPAC_MOUSE	18 kDa			2														FALSE	FALSE	FALSE	FALSE	FALSE	FALSE
Threonine--tRNA ligase, cytoplasmic OS=Mus musculus GN=Tars PE=1 SV=2	Tars	SYTC_MOUSE	83 kDa			2		2	4				0.367879			2				FALSE	FALSE	FALSE	FALSE	FALSE	FALSE
Protein NipSnap homolog 2 OS=Mus musculus GN=Gbas PE=2 SV=1	Gbas	NIPS2_MOUSE	33 kDa			2			2				1			1				FALSE	FALSE	FALSE	FALSE	FALSE	FALSE
Coatomer subunit epsilon OS=Mus musculus GN=Cope PE=2 SV=3	Cope	COPE_MOUSE	35 kDa			2	3		2				1			1				FALSE	FALSE	TRUE	FALSE	FALSE	FALSE
Arf-GAP with SH3 domain, ANK repeat and PH domain-containing protein 2 OS=Mus musculus GN=Asap2 PE=1 SV=3	Asap2	ASAP2_MOUSE	107 kDa					2	2		2		1					1		FALSE	FALSE	FALSE	FALSE	FALSE	FALSE
Ras-related protein Rab-2A OS=Mus musculus GN=Rab2a PE=1 SV=1	Rab2a	RAB2A_MOUSE	24 kDa			4			2				0.606531			0.5				FALSE	FALSE	TRUE	FALSE	FALSE	FALSE
Fragile X mental retardation syndrome-related protein 1 OS=Mus musculus GN=Fxr1 PE=1 SV=2	Fxr1	FXR1_MOUSE	76 kDa			2		2	2				1			1				FALSE	FALSE	FALSE	FALSE	FALSE	FALSE
Large proline-rich protein BAG6 OS=Mus musculus GN=Bag6 PE=1 SV=1	Bag6	BAG6_MOUSE	121 kDa			2			3				0.778801			1.5				FALSE	FALSE	FALSE	TRUE	FALSE	FALSE
Serologically defined colon cancer antigen 8 homolog OS=Mus musculus GN=Sdccag8 PE=1 SV=1	Sdccag8	SDCG8_MOUSE	83 kDa						2											FALSE	FALSE	FALSE	FALSE	FALSE	FALSE
Probable ATP-dependent RNA helicase DDX46 OS=Mus musculus GN=Ddx46 PE=1 SV=2	Ddx46	DDX46_MOUSE	117 kDa			2				2			1							FALSE	TRUE	FALSE	FALSE	FALSE	FALSE
Staphylococcal nuclease domain-containing protein 1 OS=Mus musculus GN=Snd1 PE=1 SV=1	Snd1	SND1_MOUSE	102 kDa			4			2				0.606531			0.5				TRUE	FALSE	FALSE	FALSE	FALSE	FALSE
Malate dehydrogenase, cytoplasmic OS=Mus musculus GN=Mdh1 PE=1 SV=3	Mdh1	MDHC_MOUSE	37 kDa			3			2				0.846482			0.666667				FALSE	FALSE	FALSE	FALSE	FALSE	FALSE
Guanine nucleotide-binding protein G(t) subunit alpha-3 OS=Mus musculus GN=Gnat3 PE=1 SV=2	Gnat3	GNAT3_MOUSE	40 kDa					2	2				1							FALSE	FALSE	FALSE	FALSE	FALSE	FALSE
Basigin OS=Mus musculus GN=Bsg PE=1 SV=2	Bsg	BASI_MOUSE	42 kDa			2		2												TRUE	FALSE	FALSE	FALSE	FALSE	FALSE
14-3-3 protein gamma OS=Mus musculus GN=Ywhag PE=1 SV=2	Ywhag	1433G_MOUSE	28 kDa			3														FALSE	FALSE	FALSE	FALSE	FALSE	FALSE
Tubulin alpha-4A chain OS=Mus musculus GN=Tuba4a PE=1 SV=1	Tuba4a	TBA4A_MOUSE	50 kDa			2														FALSE	FALSE	FALSE	FALSE	TRUE	FALSE
Nicotinamide phosphoribosyltransferase OS=Mus musculus GN=Nampt PE=1 SV=1	Nampt	NAMPT_MOUSE	55 kDa					2												FALSE	FALSE	FALSE	FALSE	FALSE	FALSE
40S ribosomal protein S21 OS=Mus musculus GN=Rps21 PE=2 SV=1	Rps21	RS21_MOUSE	9 kDa					2	2				1							FALSE	FALSE	FALSE	FALSE	FALSE	FALSE
Electron transfer flavoprotein subunit beta OS=Mus musculus GN=Etfb PE=1 SV=3	Etfb	ETFB_MOUSE	28 kDa			2		3	3				0.778801			1.5				FALSE	FALSE	FALSE	FALSE	FALSE	FALSE
Complement C4-B OS=Mus musculus GN=C4b PE=1 SV=3	C4b	CO4B_MOUSE	193 kDa					2			2		1					1		FALSE	FALSE	FALSE	FALSE	FALSE	FALSE
Succinyl-CoA:3-ketoacid coenzyme A transferase 1, mitochondrial OS=Mus musculus GN=Oxct1 PE=1 SV=1	Oxct1	SCOT1_MOUSE	56 kDa			3		2			2		1					1		FALSE	FALSE	FALSE	FALSE	FALSE	FALSE
Zinc finger protein 410 OS=Mus musculus GN=Znf410 PE=2 SV=2	Znf410	ZN410_MOUSE	52 kDa					2			2		1					1		FALSE	FALSE	FALSE	FALSE	FALSE	FALSE
Serine/threonine-protein phosphatase 2A 55 kDa regulatory subunit B alpha isoform OS=Mus musculus GN=Ppp2r2a PE=1 SV=1	Ppp2r2a	2ABA_MOUSE	52 kDa			2		2	2				1			1				FALSE	FALSE	FALSE	FALSE	FALSE	FALSE
cAMP-dependent protein kinase catalytic subunit alpha OS=Mus musculus GN=Prkaca PE=1 SV=3	Prkaca	KAPCA_MOUSE	41 kDa			2		3	3	2			0.778801			1.5				FALSE	FALSE	FALSE	FALSE	FALSE	FALSE
Eukaryotic initiation factor 4A-III OS=Mus musculus GN=Eif4a3 PE=2 SV=3	Eif4a3	IF4A3_MOUSE	47 kDa			2		2	2				1			1				FALSE	TRUE	FALSE	FALSE	FALSE	FALSE
ATP-binding cassette sub-family F member 1 OS=Mus musculus GN=Abcf1 PE=1 SV=1	Abcf1	ABCF1_MOUSE	95 kDa							3										FALSE	FALSE	FALSE	FALSE	FALSE	FALSE
Calcium-binding mitochondrial carrier protein SCaMC-1 OS=Mus musculus GN=Slc25a24 PE=1 SV=1	Slc25a24	SCMC1_MOUSE	53 kDa			2	2	3	2				1			1				FALSE	FALSE	FALSE	FALSE	FALSE	FALSE
Protein NDRG1 OS=Mus musculus GN=Ndrg1 PE=1 SV=1	Ndrg1	NDRG1_MOUSE	43 kDa			3	2		3				1			1				TRUE	FALSE	FALSE	FALSE	FALSE	FALSE
Myristoylated alanine-rich C-kinase substrate OS=Mus musculus GN=Marcks PE=1 SV=2	Marcks	MARCS_MOUSE	30 kDa				2													FALSE	FALSE	FALSE	FALSE	FALSE	FALSE
Biliverdin reductase A OS=Mus musculus GN=Blvra PE=2 SV=1	Blvra	BIEA_MOUSE	34 kDa			2	2	2	3				0.778801			1.5				FALSE	FALSE	FALSE	FALSE	FALSE	FALSE
U5 small nuclear ribonucleoprotein 200 kDa helicase OS=Mus musculus GN=Snrnp200 PE=1 SV=1	Snrnp200	U520_MOUSE	245 kDa			2			2				1			1				FALSE	TRUE	FALSE	FALSE	FALSE	FALSE
Sideroflexin-1 OS=Mus musculus GN=Sfxn1 PE=1 SV=3	Sfxn1	SFXN1_MOUSE	36 kDa			2		2	2				1			1				FALSE	FALSE	FALSE	FALSE	FALSE	FALSE
H-2 class I histocompatibility antigen, K-B alpha chain OS=Mus musculus GN=H2-K1 PE=1 SV=1	H2-K1	HA1B_MOUSE	41 kDa				3	2												FALSE	FALSE	FALSE	FALSE	FALSE	FALSE
Cell division control protein 42 homolog OS=Mus musculus GN=Cdc42 PE=1 SV=2	Cdc42	CDC42_MOUSE	21 kDa			3			3				1			1				FALSE	FALSE	FALSE	FALSE	FALSE	FALSE
Probable ATP-dependent RNA helicase DDX17 OS=Mus musculus GN=Ddx17 PE=1 SV=1	Ddx17	DDX17_MOUSE	72 kDa			2	2	2	2				1			1				FALSE	FALSE	FALSE	FALSE	FALSE	FALSE
Clathrin interactor 1 OS=Mus musculus GN=Clint1 PE=1 SV=2	Clint1	EPN4_MOUSE	69 kDa			2	2		2				1			1				TRUE	FALSE	TRUE	FALSE	FALSE	FALSE
Secretory carrier-associated membrane protein 3 OS=Mus musculus GN=Scamp3 PE=1 SV=3	Scamp3	SCAM3_MOUSE	38 kDa			2		3	2				1			1				FALSE	FALSE	FALSE	FALSE	FALSE	FALSE
Monocarboxylate transporter 1 OS=Mus musculus GN=Slc16a1 PE=1 SV=1	Slc16a1	MOT1_MOUSE	53 kDa			2														FALSE	FALSE	FALSE	FALSE	FALSE	FALSE
Eukaryotic translation initiation factor 3 subunit L OS=Mus musculus GN=Eif3l PE=1 SV=1	Eif3l	EIF3L_MOUSE	67 kDa			2		2	2				1			1				FALSE	FALSE	FALSE	FALSE	FALSE	FALSE
Histone-lysine N-methyltransferase SETDB1 OS=Mus musculus GN=Setdb1 PE=1 SV=1	Setdb1	SETB1_MOUSE	145 kDa				2													FALSE	FALSE	FALSE	FALSE	FALSE	FALSE
Fer-1-like protein 5 OS=Mus musculus GN=Fer1l5 PE=1 SV=1	Fer1l5	FR1L5_MOUSE	236 kDa			2														FALSE	FALSE	FALSE	FALSE	FALSE	FALSE
Histone deacetylase 2 OS=Mus musculus GN=Hdac2 PE=1 SV=1	Hdac2	HDAC2_MOUSE	55 kDa			2		2	2				1			1				FALSE	FALSE	FALSE	FALSE	FALSE	FALSE
Hypoxia up-regulated protein 1 OS=Mus musculus GN=Hyou1 PE=1 SV=1	Hyou1	HYOU1_MOUSE	111 kDa			3														FALSE	FALSE	FALSE	FALSE	FALSE	FALSE
Rho guanine nucleotide exchange factor 10-like protein OS=Mus musculus GN=Arhgef10l PE=1 SV=1	Arhgef10l	ARGAL_MOUSE	140 kDa				2	2												FALSE	FALSE	FALSE	FALSE	FALSE	FALSE
Proteasome subunit beta type-1 OS=Mus musculus GN=Psmb1 PE=1 SV=1	Psmb1	PSB1_MOUSE	26 kDa			3			3				1			1				FALSE	FALSE	FALSE	FALSE	FALSE	FALSE
UV excision repair protein RAD23 homolog B OS=Mus musculus GN=Rad23b PE=1 SV=2	Rad23b	RD23B_MOUSE	44 kDa			3		3	2				0.846482			0.666667				FALSE	FALSE	FALSE	FALSE	FALSE	FALSE
Kinectin OS=Mus musculus GN=Ktn1 PE=2 SV=1	Ktn1	KTN1_MOUSE	153 kDa			3														FALSE	FALSE	FALSE	FALSE	FALSE	FALSE
Fumarate hydratase, mitochondrial OS=Mus musculus GN=Fh PE=1 SV=3	Fh	FUMH_MOUSE	54 kDa						2											FALSE	FALSE	FALSE	FALSE	FALSE	FALSE
Thioredoxin OS=Mus musculus GN=Txn PE=1 SV=3	Txn	THIO_MOUSE	12 kDa			2			2				1			1				FALSE	FALSE	FALSE	FALSE	FALSE	FALSE
60S ribosomal protein L34 OS=Mus musculus GN=Rpl34 PE=1 SV=2	Rpl34	RL34_MOUSE	13 kDa					2	2	2			1							FALSE	FALSE	FALSE	FALSE	FALSE	FALSE
3-ketoacyl-CoA thiolase, mitochondrial OS=Mus musculus GN=Acaa2 PE=1 SV=3	Acaa2	THIM_MOUSE	42 kDa					2	2		2		1					1		FALSE	FALSE	FALSE	FALSE	FALSE	FALSE
40S ribosomal protein S26 OS=Mus musculus GN=Rps26 PE=2 SV=3	Rps26	RS26_MOUSE	13 kDa			2			2				1			1				TRUE	FALSE	FALSE	FALSE	FALSE	FALSE
60S ribosomal protein L35a OS=Mus musculus GN=Rpl35a PE=1 SV=2	Rpl35a	RL35A_MOUSE	13 kDa							2										FALSE	FALSE	FALSE	FALSE	FALSE	FALSE
Proteasome subunit alpha type-2 OS=Mus musculus GN=Psma2 PE=1 SV=3	Psma2	PSA2_MOUSE	26 kDa				2	2	3				1							FALSE	FALSE	FALSE	TRUE	FALSE	FALSE
Proteasome subunit beta type-6 OS=Mus musculus GN=Psmb6 PE=1 SV=3	Psmb6	PSB6_MOUSE	25 kDa			3														TRUE	FALSE	FALSE	FALSE	FALSE	FALSE
Mitogen-activated protein kinase 1 OS=Mus musculus GN=Mapk1 PE=1 SV=3	Mapk1	MK01_MOUSE	41 kDa				3	2	3				1							FALSE	FALSE	FALSE	FALSE	FALSE	FALSE
Phosphatidylinositol 3,4,5-trisphosphate-dependent Rac exchanger 1 protein OS=Mus musculus GN=Prex1 PE=1 SV=2	Prex1	PREX1_MOUSE	185 kDa				2													FALSE	FALSE	FALSE	FALSE	FALSE	FALSE
Actin-related protein 2/3 complex subunit 4 OS=Mus musculus GN=Arpc4 PE=1 SV=3	Arpc4	ARPC4_MOUSE	20 kDa			2	2		2				1			1				FALSE	FALSE	FALSE	FALSE	FALSE	FALSE
High mobility group protein B1 OS=Mus musculus GN=Hmgb1 PE=1 SV=2	Hmgb1	HMGB1_MOUSE	25 kDa			3														FALSE	FALSE	FALSE	FALSE	FALSE	FALSE
Guanylate-binding protein 4 OS=Mus musculus GN=Gbp4 PE=1 SV=1	Gbp4	GBP4_MOUSE	71 kDa			2	2													FALSE	FALSE	FALSE	FALSE	FALSE	FALSE
Luc7-like protein 3 OS=Mus musculus GN=Luc7l3 PE=1 SV=1	Luc7l3	LC7L3_MOUSE	51 kDa			2		2		3			1							FALSE	TRUE	FALSE	FALSE	FALSE	FALSE
Serine/threonine-protein phosphatase 2A catalytic subunit beta isoform OS=Mus musculus GN=Ppp2cb PE=1 SV=1	Ppp2cb	PP2AB_MOUSE	36 kDa			2		2												FALSE	FALSE	FALSE	FALSE	FALSE	FALSE
Brefeldin A-inhibited guanine nucleotide-exchange protein 1 OS=Mus musculus GN=Arfgef1 PE=2 SV=1	Arfgef1	BIG1_MOUSE	209 kDa					2												FALSE	FALSE	TRUE	FALSE	FALSE	FALSE
Calumenin OS=Mus musculus GN=Calu PE=1 SV=1	Calu	CALU_MOUSE	37 kDa			3			2				0.846482			0.666667				FALSE	FALSE	FALSE	FALSE	FALSE	FALSE
Catenin beta-1 OS=Mus musculus GN=Ctnnb1 PE=1 SV=1	Ctnnb1	CTNB1_MOUSE	85 kDa				2	3	2				1							FALSE	FALSE	FALSE	FALSE	FALSE	FALSE
Ras-related protein Rab-7a OS=Mus musculus GN=Rab7a PE=1 SV=2	Rab7a	RAB7A_MOUSE	23 kDa			3					2		1							FALSE	FALSE	FALSE	FALSE	FALSE	FALSE
Voltage-dependent anion-selective channel protein 1 OS=Mus musculus GN=Vdac1 PE=1 SV=3	Vdac1	VDAC1_MOUSE	32 kDa			2		2	4				0.367879			2				FALSE	FALSE	FALSE	FALSE	FALSE	FALSE
Protein NipSnap homolog 1 OS=Mus musculus GN=Nipsnap1 PE=1 SV=1	Nipsnap1	NIPS1_MOUSE	33 kDa			2	2													FALSE	FALSE	FALSE	FALSE	FALSE	FALSE
Translocation protein SEC62 OS=Mus musculus GN=Sec62 PE=1 SV=1	Sec62	SEC62_MOUSE	46 kDa			2		2		2			1							FALSE	FALSE	FALSE	FALSE	FALSE	FALSE
Leucine-rich repeat-containing protein 47 OS=Mus musculus GN=Lrrc47 PE=2 SV=1	Lrrc47	LRC47_MOUSE	64 kDa			3														FALSE	FALSE	FALSE	FALSE	FALSE	FALSE
NADH-cytochrome b5 reductase 3 OS=Mus musculus GN=Cyb5r3 PE=1 SV=3	Cyb5r3	NB5R3_MOUSE	34 kDa			5	2													FALSE	FALSE	FALSE	FALSE	FALSE	FALSE
Histone H4 OS=Mus musculus GN=Hist1h4a PE=1 SV=2	Hist1h4a	H4_MOUSE	11 kDa		3							3								FALSE	FALSE	FALSE	FALSE	FALSE	FALSE
Arginase-1 OS=Mus musculus GN=Arg1 PE=1 SV=1	Arg1	ARGI1_MOUSE	35 kDa						3	3										FALSE	FALSE	FALSE	FALSE	FALSE	FALSE
Prostaglandin E synthase 3 OS=Mus musculus GN=Ptges3 PE=1 SV=1	Ptges3	TEBP_MOUSE	19 kDa			3			3				1			1				FALSE	FALSE	FALSE	FALSE	FALSE	FALSE
Spectrin alpha chain, non-erythrocytic 1 OS=Mus musculus GN=Sptan1 PE=1 SV=4	Sptan1	SPTN1_MOUSE	285 kDa				2													FALSE	FALSE	FALSE	FALSE	FALSE	FALSE
Dual specificity mitogen-activated protein kinase kinase 1 OS=Mus musculus GN=Map2k1 PE=1 SV=2	Map2k1	MP2K1_MOUSE	43 kDa			2			2				1			1				FALSE	FALSE	FALSE	FALSE	FALSE	FALSE
Protein PRRC2C OS=Mus musculus GN=Prrc2c PE=1 SV=3	Prrc2c	PRC2C_MOUSE	311 kDa					2												FALSE	FALSE	FALSE	FALSE	FALSE	FALSE
Endoplasmic reticulum-Golgi intermediate compartment protein 1 OS=Mus musculus GN=Ergic1 PE=1 SV=1	Ergic1	ERGI1_MOUSE	33 kDa			3		3	3				1			1				FALSE	FALSE	TRUE	FALSE	FALSE	FALSE
Ubiquitin carboxyl-terminal hydrolase 5 OS=Mus musculus GN=Usp5 PE=1 SV=1	Usp5	UBP5_MOUSE	96 kDa			3			3				1			1				FALSE	FALSE	FALSE	TRUE	FALSE	FALSE
Heterogeneous nuclear ribonucleoprotein A3 OS=Mus musculus GN=Hnrnpa3 PE=1 SV=1	Hnrnpa3	ROA3_MOUSE	40 kDa			3														FALSE	TRUE	FALSE	FALSE	FALSE	FALSE
SUMO-activating enzyme subunit 2 OS=Mus musculus GN=Uba2 PE=1 SV=1	Uba2	SAE2_MOUSE	71 kDa			4	2		3				0.882497			0.75				FALSE	FALSE	FALSE	FALSE	FALSE	FALSE
Transforming protein RhoA OS=Mus musculus GN=Rhoa PE=1 SV=1	Rhoa	RHOA_MOUSE	22 kDa			2														FALSE	FALSE	FALSE	FALSE	FALSE	TRUE
Eukaryotic translation initiation factor 3 subunit H OS=Mus musculus GN=Eif3h PE=1 SV=1	Eif3h	EIF3H_MOUSE	40 kDa				2													FALSE	FALSE	FALSE	FALSE	FALSE	FALSE
Mitochondrial import inner membrane translocase subunit TIM50 OS=Mus musculus GN=Timm50 PE=1 SV=1	Timm50	TIM50_MOUSE	40 kDa				2		2				1							FALSE	FALSE	FALSE	FALSE	FALSE	FALSE
Proteasome subunit beta type-8 OS=Mus musculus GN=Psmb8 PE=1 SV=2	Psmb8	PSB8_MOUSE	30 kDa			2			2				1			1				FALSE	FALSE	FALSE	FALSE	FALSE	FALSE
Histone-binding protein RBBP4 OS=Mus musculus GN=Rbbp4 PE=1 SV=5	Rbbp4	RBBP4_MOUSE	48 kDa			2		2												FALSE	FALSE	FALSE	FALSE	FALSE	FALSE
Catenin delta-1 OS=Mus musculus GN=Ctnnd1 PE=1 SV=2	Ctnnd1	CTND1_MOUSE	105 kDa						2											FALSE	FALSE	FALSE	FALSE	FALSE	FALSE
Elongation factor G, mitochondrial OS=Mus musculus GN=Gfm1 PE=2 SV=1	Gfm1	EFGM_MOUSE	84 kDa				2		2				1							FALSE	FALSE	FALSE	FALSE	FALSE	FALSE
Serpin H1 OS=Mus musculus GN=Serpinh1 PE=1 SV=3	Serpinh1	SERPH_MOUSE	47 kDa						3											FALSE	FALSE	FALSE	FALSE	FALSE	FALSE
Protein transport protein Sec23B OS=Mus musculus GN=Sec23b PE=1 SV=1	Sec23b	SC23B_MOUSE	86 kDa			2														FALSE	FALSE	TRUE	FALSE	FALSE	FALSE
N-alpha-acetyltransferase 15, NatA auxiliary subunit OS=Mus musculus GN=Naa15 PE=1 SV=1	Naa15	NAA15_MOUSE	101 kDa				2		2				1							FALSE	FALSE	FALSE	FALSE	FALSE	FALSE
Destrin OS=Mus musculus GN=Dstn PE=1 SV=3	Dstn	DEST_MOUSE	19 kDa			2	2		2				1			1				FALSE	FALSE	FALSE	FALSE	FALSE	FALSE
Septin-2 OS=Mus musculus GN=Sept2 PE=1 SV=2	37500	SEPT2_MOUSE	42 kDa						2											TRUE	FALSE	FALSE	FALSE	FALSE	FALSE
Inorganic pyrophosphatase OS=Mus musculus GN=Ppa1 PE=1 SV=1	Ppa1	IPYR_MOUSE	33 kDa					2	2				1							FALSE	FALSE	FALSE	FALSE	FALSE	FALSE
Plasminogen activator inhibitor 1 RNA-binding protein OS=Mus musculus GN=Serbp1 PE=1 SV=2	Serbp1	PAIRB_MOUSE	45 kDa			2														TRUE	FALSE	FALSE	FALSE	FALSE	FALSE
Polypyrimidine tract-binding protein 1 OS=Mus musculus GN=Ptbp1 PE=1 SV=2	Ptbp1	PTBP1_MOUSE	56 kDa				2	2	2				1							FALSE	TRUE	FALSE	FALSE	FALSE	FALSE
Cleavage and polyadenylation specificity factor subunit 6 OS=Mus musculus GN=Cpsf6 PE=2 SV=1	Cpsf6	CPSF6_MOUSE	59 kDa			3														FALSE	FALSE	FALSE	FALSE	FALSE	FALSE
Cystathionine gamma-lyase OS=Mus musculus GN=Cth PE=1 SV=1	Cth	CGL_MOUSE	44 kDa			5			2				0.40657			0.4				FALSE	FALSE	FALSE	FALSE	FALSE	FALSE
Glutamate--cysteine ligase regulatory subunit OS=Mus musculus GN=Gclm PE=2 SV=1	Gclm	GSH0_MOUSE	31 kDa					2												FALSE	FALSE	FALSE	FALSE	FALSE	FALSE
Dipeptidyl peptidase 3 OS=Mus musculus GN=Dpp3 PE=2 SV=2	Dpp3	DPP3_MOUSE	83 kDa			4														FALSE	FALSE	FALSE	FALSE	FALSE	FALSE
NEDD8 ultimate buster 1 OS=Mus musculus GN=Nub1 PE=1 SV=2	Nub1	NUB1_MOUSE	70 kDa			2	2		3				0.778801			1.5				FALSE	FALSE	FALSE	TRUE	FALSE	FALSE
Serrate RNA effector molecule homolog OS=Mus musculus GN=Srrt PE=1 SV=1	Srrt	SRRT_MOUSE	100 kDa					2	2				1							FALSE	FALSE	FALSE	FALSE	FALSE	FALSE
26S proteasome non-ATPase regulatory subunit 5 OS=Mus musculus GN=Psmd5 PE=1 SV=4	Psmd5	PSMD5_MOUSE	56 kDa			2		2	2				1			1				FALSE	FALSE	FALSE	FALSE	FALSE	FALSE
60S ribosomal protein L18a OS=Mus musculus GN=Rpl18a PE=1 SV=1	Rpl18a	RL18A_MOUSE	21 kDa			2		3	2				1			1				FALSE	FALSE	FALSE	FALSE	FALSE	FALSE
Cytosol aminopeptidase OS=Mus musculus GN=Lap3 PE=1 SV=3	Lap3	AMPL_MOUSE	56 kDa			3			3				1			1				FALSE	FALSE	FALSE	FALSE	FALSE	FALSE
Uncharacterized protein C6orf132 homolog OS=Mus musculus PE=2 SV=2	Cse1l	CF132_MOUSE	128 kDa						2											FALSE	FALSE	FALSE	FALSE	FALSE	FALSE
Exportin-2 OS=Mus musculus GN=Cse1l PE=2 SV=1	Polr2a	XPO2_MOUSE	110 kDa			2														FALSE	FALSE	FALSE	FALSE	FALSE	FALSE
DNA-directed RNA polymerase II subunit RPB1 OS=Mus musculus GN=Polr2a PE=1 SV=3	Qars	RPB1_MOUSE	217 kDa							2										FALSE	FALSE	FALSE	FALSE	FALSE	FALSE
Glutamine--tRNA ligase OS=Mus musculus OX=10090 GN=Qars PE=1 SV=1	Cops5	SYQ_MOUSE	?			2		2												FALSE	FALSE	FALSE	FALSE	FALSE	FALSE
COP9 signalosome complex subunit 5 OS=Mus musculus GN=Cops5 PE=1 SV=3	Pdia6	CSN5_MOUSE	38 kDa			2														FALSE	FALSE	FALSE	FALSE	FALSE	FALSE
Protein disulfide-isomerase A6 OS=Mus musculus GN=Pdia6 PE=1 SV=3	Ube2m	PDIA6_MOUSE	48 kDa			2	2	2												FALSE	FALSE	FALSE	FALSE	FALSE	FALSE
NEDD8-conjugating enzyme Ubc12 OS=Mus musculus GN=Ube2m PE=2 SV=1	Rpl22	UBC12_MOUSE	21 kDa			2		2												FALSE	FALSE	FALSE	FALSE	FALSE	FALSE
60S ribosomal protein L22 OS=Mus musculus GN=Rpl22 PE=1 SV=2	Pdxdc1	RL22_MOUSE	15 kDa			2				2			1							FALSE	FALSE	FALSE	FALSE	FALSE	FALSE
Pyridoxal-dependent decarboxylase domain-containing protein 1 OS=Mus musculus GN=Pdxdc1 PE=1 SV=2	Ndufa4	PDXD1_MOUSE	87 kDa						2											TRUE	FALSE	FALSE	FALSE	FALSE	FALSE
Cytochrome c oxidase subunit NDUFA4 OS=Mus musculus GN=Ndufa4 PE=1 SV=2	Farsa	NDUA4_MOUSE	9 kDa				2													FALSE	FALSE	FALSE	FALSE	FALSE	FALSE
Phenylalanine--tRNA ligase alpha subunit OS=Mus musculus GN=Farsa PE=2 SV=1	Rangap1	SYFA_MOUSE	58 kDa				2		2				1							FALSE	FALSE	FALSE	FALSE	FALSE	FALSE
Ran GTPase-activating protein 1 OS=Mus musculus GN=Rangap1 PE=1 SV=2	Acat1	RAGP1_MOUSE	64 kDa			2		3	2				1			1				FALSE	FALSE	FALSE	FALSE	FALSE	FALSE
Acetyl-CoA acetyltransferase, mitochondrial OS=Mus musculus GN=Acat1 PE=1 SV=1	Acads	THIL_MOUSE	45 kDa			2														FALSE	FALSE	FALSE	FALSE	FALSE	FALSE
Short-chain specific acyl-CoA dehydrogenase, mitochondrial OS=Mus musculus GN=Acads PE=1 SV=2	Bub3	ACADS_MOUSE	45 kDa			2			2				1			1				FALSE	FALSE	FALSE	FALSE	FALSE	FALSE
Mitotic checkpoint protein BUB3 OS=Mus musculus GN=Bub3 PE=2 SV=2	Capza1	BUB3_MOUSE	37 kDa			2			2				1			1				FALSE	FALSE	FALSE	FALSE	FALSE	FALSE
F-actin-capping protein subunit alpha-1 OS=Mus musculus GN=Capza1 PE=1 SV=4	Ddx19a	CAZA1_MOUSE	33 kDa					2	2				1							TRUE	FALSE	FALSE	FALSE	FALSE	FALSE
ATP-dependent RNA helicase DDX19A OS=Mus musculus GN=Ddx19a PE=2 SV=2	Twf1	DD19A_MOUSE	54 kDa					2	2				1							FALSE	FALSE	FALSE	FALSE	FALSE	FALSE
Twinfilin-1 OS=Mus musculus GN=Twf1 PE=1 SV=2	Dnajb1	TWF1_MOUSE	40 kDa			2	2													TRUE	FALSE	FALSE	FALSE	FALSE	FALSE
DnaJ homolog subfamily B member 1 OS=Mus musculus GN=Dnajb1 PE=2 SV=3	Hdlbp	DNJB1_MOUSE	38 kDa						2	2										TRUE	FALSE	FALSE	FALSE	FALSE	FALSE
Vigilin OS=Mus musculus GN=Hdlbp PE=1 SV=1	Atl3	VIGLN_MOUSE	142 kDa			2														TRUE	FALSE	FALSE	FALSE	FALSE	FALSE
Atlastin-3 OS=Mus musculus GN=Atl3 PE=2 SV=1	Pcbp2	ATLA3_MOUSE	61 kDa						2											FALSE	FALSE	FALSE	FALSE	FALSE	FALSE
Poly(rC)-binding protein 2 OS=Mus musculus GN=Pcbp2 PE=1 SV=1	Adh7	PCBP2_MOUSE	38 kDa						2											FALSE	FALSE	FALSE	FALSE	FALSE	FALSE
Alcohol dehydrogenase class 4 mu/sigma chain OS=Mus musculus GN=Adh7 PE=2 SV=2	Cdh6	ADH7_MOUSE	40 kDa			3		2												FALSE	FALSE	FALSE	FALSE	FALSE	FALSE
Cadherin-6 OS=Mus musculus GN=Cdh6 PE=1 SV=2	C1qa	CADH6_MOUSE	88 kDa			3														FALSE	FALSE	FALSE	FALSE	FALSE	FALSE
Complement C1q subcomponent subunit A OS=Mus musculus GN=C1qa PE=1 SV=2	Impdh2	C1QA_MOUSE	26 kDa					2												FALSE	FALSE	FALSE	FALSE	FALSE	FALSE
Inosine-5'-monophosphate dehydrogenase 2 OS=Mus musculus GN=Impdh2 PE=1 SV=2	Sec23a	IMDH2_MOUSE	56 kDa						2											FALSE	FALSE	FALSE	FALSE	FALSE	FALSE
Protein transport protein Sec23A OS=Mus musculus GN=Sec23a PE=1 SV=2	Hydin	SC23A_MOUSE	86 kDa			3														FALSE	FALSE	TRUE	FALSE	FALSE	FALSE
Hydrocephalus-inducing protein OS=Mus musculus GN=Hydin PE=2 SV=2	Isyna1	HYDIN_MOUSE	582 kDa							2										FALSE	FALSE	FALSE	FALSE	FALSE	FALSE
Inositol-3-phosphate synthase 1 OS=Mus musculus GN=Isyna1 PE=2 SV=1	Cfap58	INO1_MOUSE	61 kDa			3	2													FALSE	FALSE	FALSE	FALSE	FALSE	FALSE
Cilia- and flagella-associated protein 58 OS=Mus musculus GN=Cfap58 PE=2 SV=1	Eif5	CFA58_MOUSE	104 kDa					2												FALSE	FALSE	FALSE	FALSE	FALSE	FALSE
Eukaryotic translation initiation factor 5 OS=Mus musculus GN=Eif5 PE=1 SV=1	Kdm3a	IF5_MOUSE	49 kDa						2	4										TRUE	FALSE	FALSE	FALSE	FALSE	FALSE
Lysine-specific demethylase 3A OS=Mus musculus GN=Kdm3a PE=1 SV=1	Stat6	KDM3A_MOUSE	148 kDa							2										FALSE	FALSE	FALSE	FALSE	FALSE	FALSE
Signal transducer and transcription activator 6 OS=Mus musculus GN=Stat6 PE=1 SV=2	Atp1a3	STAT6_MOUSE	93 kDa						2											FALSE	FALSE	FALSE	FALSE	FALSE	FALSE
Sodium/potassium-transporting ATPase subunit alpha-3 OS=Mus musculus GN=Atp1a3 PE=1 SV=1	Fkbp10	AT1A3_MOUSE	112 kDa							2										FALSE	FALSE	FALSE	FALSE	FALSE	FALSE
Peptidyl-prolyl cis-trans isomerase FKBP10 OS=Mus musculus GN=Fkbp10 PE=1 SV=2	Nccrp1	FKB10_MOUSE	65 kDa					2												FALSE	FALSE	FALSE	FALSE	FALSE	FALSE
F-box only protein 50 OS=Mus musculus GN=Nccrp1 PE=2 SV=2	Slc25a1	FBX50_MOUSE	30 kDa						2	2										FALSE	FALSE	FALSE	FALSE	FALSE	FALSE
Tricarboxylate transport protein, mitochondrial OS=Mus musculus GN=Slc25a1 PE=2 SV=1	Slc2a1	TXTP_MOUSE	34 kDa						2											FALSE	FALSE	FALSE	FALSE	FALSE	FALSE
Solute carrier family 2, facilitated glucose transporter member 1 OS=Mus musculus GN=Slc2a1 PE=1 SV=4	Sec11a	GTR1_MOUSE	54 kDa					2												FALSE	FALSE	FALSE	FALSE	FALSE	FALSE
Signal peptidase complex catalytic subunit SEC11A OS=Mus musculus GN=Sec11a PE=2 SV=1	Cnn2	SC11A_MOUSE	21 kDa						2											FALSE	FALSE	FALSE	FALSE	FALSE	FALSE
Calponin-2 OS=Mus musculus GN=Cnn2 PE=1 SV=1	Ppp1ca	CNN2_MOUSE	33 kDa			2		2	2				1			1				TRUE	FALSE	FALSE	FALSE	FALSE	FALSE
Serine/threonine-protein phosphatase PP1-alpha catalytic subunit OS=Mus musculus GN=Ppp1ca PE=1 SV=1	Hmox2	PP1A_MOUSE	38 kDa			2			2				1			1				FALSE	FALSE	FALSE	FALSE	FALSE	FALSE
Heme oxygenase 2 OS=Mus musculus GN=Hmox2 PE=2 SV=1	Rdh11	HMOX2_MOUSE	36 kDa			2														FALSE	FALSE	FALSE	FALSE	FALSE	FALSE
Retinol dehydrogenase 11 OS=Mus musculus GN=Rdh11 PE=2 SV=2	Srsf3	RDH11_MOUSE	35 kDa			2														FALSE	FALSE	FALSE	FALSE	FALSE	FALSE
Serine/arginine-rich splicing factor 3 OS=Mus musculus GN=Srsf3 PE=1 SV=1	Ckap4	SRSF3_MOUSE	19 kDa			2														FALSE	TRUE	FALSE	FALSE	FALSE	FALSE
Cytoskeleton-associated protein 4 OS=Mus musculus GN=Ckap4 PE=1 SV=2	Ddx6	CKAP4_MOUSE	64 kDa					2												FALSE	FALSE	FALSE	FALSE	FALSE	FALSE
Probable ATP-dependent RNA helicase DDX6 OS=Mus musculus GN=Ddx6 PE=1 SV=1	Hnrnpa2b1	DDX6_MOUSE	54 kDa			2														TRUE	FALSE	FALSE	FALSE	FALSE	FALSE
Heterogeneous nuclear ribonucleoproteins A2/B1 OS=Mus musculus GN=Hnrnpa2b1 PE=1 SV=2	Eif4g2	ROA2_MOUSE	37 kDa			2														FALSE	TRUE	FALSE	FALSE	FALSE	FALSE
Eukaryotic translation initiation factor 4 gamma 2 OS=Mus musculus GN=Eif4g2 PE=1 SV=2	Smek1	IF4G2_MOUSE	102 kDa			2														TRUE	FALSE	FALSE	FALSE	FALSE	FALSE
Serine/threonine-protein phosphatase 4 regulatory subunit 3A OS=Mus musculus GN=Smek1 PE=1 SV=1	Sf3b3	P4R3A_MOUSE	94 kDa			2			2				1			1				FALSE	FALSE	FALSE	FALSE	FALSE	FALSE
Splicing factor 3B subunit 3 OS=Mus musculus GN=Sf3b3 PE=2 SV=1	Psmd13	SF3B3_MOUSE	136 kDa			2	2													FALSE	TRUE	FALSE	FALSE	FALSE	FALSE
26S proteasome non-ATPase regulatory subunit 13 OS=Mus musculus GN=Psmd13 PE=1 SV=1	Pycrl	PSD13_MOUSE	43 kDa					2	2				1							FALSE	FALSE	FALSE	TRUE	FALSE	FALSE
Pyrroline-5-carboxylate reductase 3 OS=Mus musculus GN=Pycrl PE=2 SV=2	Lypla2	P5CR3_MOUSE	29 kDa						2											FALSE	FALSE	FALSE	FALSE	FALSE	FALSE
Acyl-protein thioesterase 2 OS=Mus musculus GN=Lypla2 PE=1 SV=1	Gcat	LYPA2_MOUSE	25 kDa					2												TRUE	FALSE	FALSE	FALSE	FALSE	FALSE
2-amino-3-ketobutyrate coenzyme A ligase, mitochondrial OS=Mus musculus GN=Gcat PE=1 SV=2	Ifi35	KBL_MOUSE	45 kDa			2		2												FALSE	FALSE	FALSE	FALSE	FALSE	FALSE
Interferon-induced 35 kDa protein homolog OS=Mus musculus GN=Ifi35 PE=2 SV=3	Camk2d	IN35_MOUSE	32 kDa							2										FALSE	FALSE	FALSE	FALSE	FALSE	FALSE
Calcium/calmodulin-dependent protein kinase type II subunit delta OS=Mus musculus GN=Camk2d PE=1 SV=1	Uso1	KCC2D_MOUSE	56 kDa						2											FALSE	FALSE	FALSE	FALSE	FALSE	FALSE
General vesicular transport factor p115 OS=Mus musculus GN=Uso1 PE=1 SV=2	Hk2	USO1_MOUSE	107 kDa			2			2				1			1				TRUE	FALSE	TRUE	FALSE	FALSE	FALSE
Hexokinase-2 OS=Mus musculus GN=Hk2 PE=2 SV=1	Rab14	HXK2_MOUSE	103 kDa			2		3												FALSE	FALSE	FALSE	FALSE	FALSE	FALSE
Ras-related protein Rab-14 OS=Mus musculus GN=Rab14 PE=1 SV=3	Tgm1	RAB14_MOUSE	24 kDa						2											FALSE	FALSE	FALSE	FALSE	FALSE	FALSE
Protein-glutamine gamma-glutamyltransferase K OS=Mus musculus GN=Tgm1 PE=1 SV=2	Rpl36a	TGM1_MOUSE	90 kDa						2	2										FALSE	FALSE	FALSE	FALSE	FALSE	FALSE
60S ribosomal protein L36a OS=Mus musculus GN=Rpl36a PE=1 SV=2	Pa2g4	RL36A_MOUSE	12 kDa				2	2												FALSE	FALSE	FALSE	FALSE	FALSE	FALSE
Proliferation-associated protein 2G4 OS=Mus musculus GN=Pa2g4 PE=1 SV=3	Srsf2	PA2G4_MOUSE	44 kDa			3														FALSE	FALSE	FALSE	FALSE	FALSE	FALSE
Serine/arginine-rich splicing factor 2 OS=Mus musculus GN=Srsf2 PE=1 SV=4	Lman1	SRSF2_MOUSE	25 kDa			2														FALSE	TRUE	FALSE	FALSE	FALSE	FALSE
Protein ERGIC-53 OS=Mus musculus GN=Lman1 PE=2 SV=1	Pak2	LMAN1_MOUSE	58 kDa			2			3				0.778801			1.5				FALSE	FALSE	TRUE	FALSE	FALSE	FALSE
Serine/threonine-protein kinase PAK 2 OS=Mus musculus GN=Pak2 PE=1 SV=1	Trdn	PAK2_MOUSE	58 kDa			2			2				1			1				FALSE	FALSE	FALSE	FALSE	FALSE	FALSE
Triadin OS=Mus musculus GN=Trdn PE=1 SV=1	Ddx21	TRDN_MOUSE	78 kDa						2											FALSE	FALSE	FALSE	FALSE	FALSE	FALSE
Nucleolar RNA helicase 2 OS=Mus musculus GN=Ddx21 PE=1 SV=3	Bmp2k	DDX21_MOUSE	94 kDa			2														FALSE	FALSE	FALSE	FALSE	FALSE	FALSE
BMP-2-inducible protein kinase OS=Mus musculus GN=Bmp2k PE=1 SV=1	Csnk2b	BMP2K_MOUSE	126 kDa							2										FALSE	FALSE	FALSE	FALSE	FALSE	FALSE
Casein kinase II subunit beta OS=Mus musculus GN=Csnk2b PE=1 SV=1	Prpf19	CSK2B_MOUSE	25 kDa			2			2				1			1				FALSE	FALSE	FALSE	FALSE	FALSE	FALSE
Pre-mRNA-processing factor 19 OS=Mus musculus GN=Prpf19 PE=1 SV=1	Acadm	PRP19_MOUSE	55 kDa			2														FALSE	TRUE	FALSE	FALSE	FALSE	FALSE
Medium-chain specific acyl-CoA dehydrogenase, mitochondrial OS=Mus musculus GN=Acadm PE=1 SV=1	Cgn	ACADM_MOUSE	46 kDa						2											FALSE	FALSE	FALSE	FALSE	FALSE	FALSE
Cingulin OS=Mus musculus GN=Cgn PE=1 SV=1	Pebp1	CING_MOUSE	136 kDa			2														TRUE	FALSE	FALSE	FALSE	FALSE	FALSE
Phosphatidylethanolamine-binding protein 1 OS=Mus musculus GN=Pebp1 PE=1 SV=3	Rbm25	PEBP1_MOUSE	21 kDa			3			3				1			1				FALSE	FALSE	FALSE	FALSE	FALSE	FALSE
RNA-binding protein 25 OS=Mus musculus GN=Rbm25 PE=1 SV=2	Kcnh7	RBM25_MOUSE	100 kDa			2														FALSE	TRUE	FALSE	FALSE	FALSE	FALSE
Potassium voltage-gated channel subfamily H member 7 OS=Mus musculus GN=Kcnh7 PE=2 SV=2	Gsr	KCNH7_MOUSE	135 kDa			2	2													FALSE	FALSE	FALSE	FALSE	FALSE	FALSE
Glutathione reductase, mitochondrial OS=Mus musculus GN=Gsr PE=1 SV=3	Prkcsh	GSHR_MOUSE	54 kDa			3			2				0.846482			0.666667				FALSE	FALSE	FALSE	FALSE	FALSE	FALSE
Glucosidase 2 subunit beta OS=Mus musculus GN=Prkcsh PE=1 SV=1	Cdk2	GLU2B_MOUSE	59 kDa			2			2				1			1				FALSE	FALSE	FALSE	FALSE	FALSE	FALSE
Cyclin-dependent kinase 2 OS=Mus musculus GN=Cdk2 PE=1 SV=2	Plaa	CDK2_MOUSE	39 kDa			2			2				1			1				FALSE	FALSE	FALSE	FALSE	FALSE	FALSE
Phospholipase A-2-activating protein OS=Mus musculus GN=Plaa PE=1 SV=4	Pcm1	PLAP_MOUSE	87 kDa			2														FALSE	FALSE	FALSE	FALSE	FALSE	FALSE
Pericentriolar material 1 protein OS=Mus musculus GN=Pcm1 PE=1 SV=2	Ercc6l2	PCM1_MOUSE	229 kDa			2														FALSE	FALSE	FALSE	FALSE	FALSE	FALSE
DNA excision repair protein ERCC-6-like 2 OS=Mus musculus GN=Ercc6l2 PE=2 SV=3	Qdpr	ER6L2_MOUSE	174 kDa			2														FALSE	FALSE	FALSE	FALSE	FALSE	FALSE
Dihydropteridine reductase OS=Mus musculus GN=Qdpr PE=1 SV=2	Sec22b	DHPR_MOUSE	26 kDa								4									FALSE	FALSE	FALSE	FALSE	FALSE	FALSE
Vesicle-trafficking protein SEC22b OS=Mus musculus GN=Sec22b PE=1 SV=3	Arid4a	SC22B_MOUSE	25 kDa			2														FALSE	FALSE	TRUE	FALSE	FALSE	FALSE
AT-rich interactive domain-containing protein 4A OS=Mus musculus OX=10090 GN=Arid4a PE=1 SV=1	Ccdc47	ARI4A_MOUSE	?					2												FALSE	FALSE	FALSE	FALSE	FALSE	FALSE
Coiled-coil domain-containing protein 47 OS=Mus musculus GN=Ccdc47 PE=2 SV=2	Umps	CCD47_MOUSE	56 kDa						2											FALSE	FALSE	FALSE	FALSE	FALSE	FALSE
Uridine 5'-monophosphate synthase OS=Mus musculus GN=Umps PE=2 SV=3	Picalm	UMPS_MOUSE	52 kDa			2														FALSE	FALSE	FALSE	FALSE	FALSE	FALSE
Phosphatidylinositol-binding clathrin assembly protein OS=Mus musculus GN=Picalm PE=1 SV=1	Stxbp2	PICAL_MOUSE	72 kDa					2												FALSE	FALSE	TRUE	FALSE	FALSE	FALSE
Syntaxin-binding protein 2 OS=Mus musculus GN=Stxbp2 PE=2 SV=1	Eif4e	STXB2_MOUSE	66 kDa			2														FALSE	FALSE	TRUE	FALSE	FALSE	FALSE
Eukaryotic translation initiation factor 4E OS=Mus musculus GN=Eif4e PE=1 SV=1	Suclg2	IF4E_MOUSE	25 kDa					2												FALSE	FALSE	FALSE	FALSE	FALSE	FALSE
Succinyl-CoA ligase [GDP-forming] subunit beta, mitochondrial OS=Mus musculus GN=Suclg2 PE=1 SV=3	Hnrnpab	SUCB2_MOUSE	47 kDa			2														FALSE	FALSE	FALSE	FALSE	FALSE	FALSE
Heterogeneous nuclear ribonucleoprotein A/B OS=Mus musculus GN=Hnrnpab PE=1 SV=1	Abce1	ROAA_MOUSE	31 kDa			2		2												FALSE	FALSE	FALSE	FALSE	FALSE	FALSE
ATP-binding cassette sub-family E member 1 OS=Mus musculus GN=Abce1 PE=2 SV=1	Rpl8	ABCE1_MOUSE	67 kDa			3														FALSE	FALSE	FALSE	FALSE	FALSE	FALSE
60S ribosomal protein L8 OS=Mus musculus GN=Rpl8 PE=1 SV=2	Sept9	RL8_MOUSE	28 kDa					3												FALSE	FALSE	FALSE	FALSE	FALSE	FALSE
Septin-9 OS=Mus musculus GN=Sept9 PE=1 SV=1	Psmb3	SEPT9_MOUSE	66 kDa			2		2												FALSE	FALSE	FALSE	FALSE	FALSE	FALSE
Proteasome subunit beta type-3 OS=Mus musculus GN=Psmb3 PE=1 SV=1	Eif2s2	PSB3_MOUSE	23 kDa			3			2				0.846482			0.666667				FALSE	FALSE	FALSE	FALSE	FALSE	FALSE
Eukaryotic translation initiation factor 2 subunit 2 OS=Mus musculus GN=Eif2s2 PE=1 SV=1	Cep104	IF2B_MOUSE	38 kDa							2										FALSE	FALSE	FALSE	FALSE	FALSE	FALSE
Centrosomal protein of 104 kDa OS=Mus musculus GN=Cep104 PE=2 SV=1	Aldh9a1	CE104_MOUSE	104 kDa				2													FALSE	FALSE	FALSE	FALSE	FALSE	FALSE
4-trimethylaminobutyraldehyde dehydrogenase OS=Mus musculus GN=Aldh9a1 PE=1 SV=1	Ubtf	AL9A1_MOUSE	54 kDa			2			2				1			1				FALSE	FALSE	FALSE	FALSE	FALSE	FALSE
Nucleolar transcription factor 1 OS=Mus musculus GN=Ubtf PE=1 SV=1	Ppp6r3	UBF1_MOUSE	90 kDa							2										FALSE	FALSE	FALSE	FALSE	FALSE	FALSE
Serine/threonine-protein phosphatase 6 regulatory subunit 3 OS=Mus musculus GN=Ppp6r3 PE=1 SV=1	Kpna2	PP6R3_MOUSE	95 kDa			2			2				1			1				FALSE	FALSE	FALSE	FALSE	FALSE	FALSE
Importin subunit alpha-1 OS=Mus musculus GN=Kpna2 PE=1 SV=2	Plcl2	IMA1_MOUSE	58 kDa						2											FALSE	FALSE	FALSE	FALSE	FALSE	FALSE
Inactive phospholipase C-like protein 2 OS=Mus musculus GN=Plcl2 PE=1 SV=2	Plod3	PLCL2_MOUSE	126 kDa						2											FALSE	FALSE	FALSE	FALSE	FALSE	FALSE
Procollagen-lysine,2-oxoglutarate 5-dioxygenase 3 OS=Mus musculus GN=Plod3 PE=1 SV=1	Ift81	PLOD3_MOUSE	85 kDa					3												FALSE	FALSE	FALSE	FALSE	FALSE	FALSE
Intraflagellar transport protein 81 homolog OS=Mus musculus GN=Ift81 PE=1 SV=4	Acadl	IFT81_MOUSE	79 kDa				2													FALSE	FALSE	FALSE	FALSE	FALSE	FALSE
Long-chain specific acyl-CoA dehydrogenase, mitochondrial OS=Mus musculus GN=Acadl PE=1 SV=2	Anxa4	ACADL_MOUSE	48 kDa			2			2				1			1				FALSE	FALSE	FALSE	FALSE	FALSE	FALSE
Annexin A4 OS=Mus musculus GN=Anxa4 PE=2 SV=4	Prkar1a	ANXA4_MOUSE	36 kDa			3														FALSE	FALSE	FALSE	FALSE	FALSE	FALSE
cAMP-dependent protein kinase type I-alpha regulatory subunit OS=Mus musculus GN=Prkar1a PE=1 SV=3	Ccar2	KAP0_MOUSE	43 kDa				2													FALSE	FALSE	FALSE	FALSE	FALSE	FALSE
Cell cycle and apoptosis regulator protein 2 OS=Mus musculus GN=Ccar2 PE=1 SV=2	Cdk6	CCAR2_MOUSE	103 kDa						2											FALSE	TRUE	FALSE	FALSE	FALSE	FALSE
Cyclin-dependent kinase 6 OS=Mus musculus GN=Cdk6 PE=1 SV=2	Gemin5	CDK6_MOUSE	37 kDa			2														FALSE	FALSE	FALSE	FALSE	FALSE	FALSE
Gem-associated protein 5 OS=Mus musculus GN=Gemin5 PE=2 SV=2	Ubn2	GEMI5_MOUSE	167 kDa			2														FALSE	TRUE	FALSE	FALSE	FALSE	FALSE
Ubinuclein-2 OS=Mus musculus GN=Ubn2 PE=1 SV=2	Huwe1	UBN2_MOUSE	142 kDa				2			2			1				1			FALSE	FALSE	FALSE	FALSE	FALSE	FALSE
E3 ubiquitin-protein ligase HUWE1 OS=Mus musculus GN=Huwe1 PE=1 SV=5	Ubap2	HUWE1_MOUSE	483 kDa					2	2				1							FALSE	FALSE	FALSE	FALSE	FALSE	FALSE
Ubiquitin-associated protein 2 OS=Mus musculus GN=Ubap2 PE=1 SV=1	Gpd2	UBAP2_MOUSE	118 kDa							2										TRUE	FALSE	FALSE	FALSE	FALSE	FALSE
Glycerol-3-phosphate dehydrogenase, mitochondrial OS=Mus musculus GN=Gpd2 PE=1 SV=2	Apoe	GPDM_MOUSE	81 kDa			3														FALSE	FALSE	FALSE	FALSE	FALSE	FALSE
Apolipoprotein E OS=Mus musculus GN=Apoe PE=1 SV=2	Bst2	APOE_MOUSE	36 kDa			4														FALSE	FALSE	FALSE	FALSE	FALSE	FALSE
Bone marrow stromal antigen 2 OS=Mus musculus GN=Bst2 PE=1 SV=1	Srp14	BST2_MOUSE	19 kDa			2														FALSE	FALSE	FALSE	FALSE	FALSE	FALSE
Signal recognition particle 14 kDa protein OS=Mus musculus GN=Srp14 PE=1 SV=1	Mthfd2	SRP14_MOUSE	13 kDa			2														FALSE	FALSE	FALSE	FALSE	FALSE	FALSE
Bifunctional methylenetetrahydrofolate dehydrogenase/cyclohydrolase, mitochondrial OS=Mus musculus GN=Mthfd2 PE=1 SV=1	Psmd11	MTDC_MOUSE	38 kDa						2											FALSE	FALSE	FALSE	FALSE	FALSE	FALSE
26S proteasome non-ATPase regulatory subunit 11 OS=Mus musculus GN=Psmd11 PE=1 SV=3	Marcksl1	PSD11_MOUSE	47 kDa			2														FALSE	FALSE	FALSE	TRUE	FALSE	FALSE
MARCKS-related protein OS=Mus musculus GN=Marcksl1 PE=1 SV=2	Ttll12	MRP_MOUSE	20 kDa			2														FALSE	FALSE	FALSE	FALSE	FALSE	FALSE
Tubulin--tyrosine ligase-like protein 12 OS=Mus musculus GN=Ttll12 PE=2 SV=1	Msh2	TTL12_MOUSE	74 kDa			2														FALSE	FALSE	FALSE	FALSE	FALSE	FALSE
DNA mismatch repair protein Msh2 OS=Mus musculus GN=Msh2 PE=1 SV=1	Por	MSH2_MOUSE	104 kDa			2														FALSE	FALSE	FALSE	FALSE	FALSE	FALSE
NADPH--cytochrome P450 reductase OS=Mus musculus GN=Por PE=1 SV=2	Niban1	NCPR_MOUSE	77 kDa			2														FALSE	FALSE	FALSE	FALSE	FALSE	FALSE
Protein Niban 1 OS=Mus musculus OX=10090 GN=Niban1 PE=1 SV=2	Smtn	NIBA1_MOUSE	?			2														FALSE	FALSE	FALSE	FALSE	FALSE	FALSE
Smoothelin OS=Mus musculus GN=Smtn PE=2 SV=2	Rcc2	SMTN_MOUSE	100 kDa			2														FALSE	FALSE	FALSE	FALSE	FALSE	FALSE
Protein RCC2 OS=Mus musculus GN=Rcc2 PE=1 SV=1	Vps4b	RCC2_MOUSE	56 kDa			2														FALSE	FALSE	FALSE	FALSE	FALSE	FALSE
Vacuolar protein sorting-associated protein 4B OS=Mus musculus GN=Vps4b PE=1 SV=2	Nsun2	VPS4B_MOUSE	49 kDa			2														FALSE	FALSE	FALSE	FALSE	FALSE	FALSE
tRNA (cytosine(34)-C(5))-methyltransferase OS=Mus musculus GN=Nsun2 PE=1 SV=2	Sec61a1	NSUN2_MOUSE	85 kDa			2														FALSE	FALSE	FALSE	FALSE	FALSE	FALSE
Protein transport protein Sec61 subunit alpha isoform 1 OS=Mus musculus GN=Sec61a1 PE=2 SV=2	Hnrnpl	S61A1_MOUSE	52 kDa					2												FALSE	FALSE	FALSE	FALSE	FALSE	FALSE
Heterogeneous nuclear ribonucleoprotein L OS=Mus musculus GN=Hnrnpl PE=1 SV=2	Rnpep	HNRPL_MOUSE	64 kDa			2														FALSE	FALSE	FALSE	FALSE	FALSE	FALSE
Aminopeptidase B OS=Mus musculus GN=Rnpep PE=2 SV=2	Timm44	AMPB_MOUSE	72 kDa			2														FALSE	FALSE	FALSE	FALSE	FALSE	FALSE
Mitochondrial import inner membrane translocase subunit TIM44 OS=Mus musculus GN=Timm44 PE=1 SV=2	Ptma	TIM44_MOUSE	51 kDa			2			2				1			1				FALSE	FALSE	FALSE	FALSE	FALSE	FALSE
Prothymosin alpha OS=Mus musculus GN=Ptma PE=1 SV=2	Capza2	PTMA_MOUSE	12 kDa			2			2				1			1				FALSE	FALSE	FALSE	FALSE	FALSE	FALSE
F-actin-capping protein subunit alpha-2 OS=Mus musculus GN=Capza2 PE=1 SV=3	Lonp1	CAZA2_MOUSE	33 kDa			2														FALSE	FALSE	FALSE	FALSE	FALSE	FALSE
Lon protease homolog, mitochondrial OS=Mus musculus GN=Lonp1 PE=1 SV=2	Rps10	LONM_MOUSE	106 kDa			3														FALSE	FALSE	FALSE	FALSE	FALSE	FALSE
40S ribosomal protein S10 OS=Mus musculus GN=Rps10 PE=1 SV=1	Bcam	RS10_MOUSE	19 kDa							3										FALSE	FALSE	FALSE	FALSE	FALSE	FALSE
Basal cell adhesion molecule OS=Mus musculus GN=Bcam PE=2 SV=1	Map4	BCAM_MOUSE	68 kDa			2														FALSE	FALSE	FALSE	FALSE	FALSE	FALSE
Microtubule-associated protein 4 OS=Mus musculus GN=Map4 PE=1 SV=3	Pafah1b1	MAP4_MOUSE	117 kDa			2														FALSE	FALSE	FALSE	FALSE	FALSE	FALSE
Platelet-activating factor acetylhydrolase IB subunit alpha OS=Mus musculus GN=Pafah1b1 PE=1 SV=2	Thop1	LIS1_MOUSE	47 kDa			2														FALSE	FALSE	FALSE	FALSE	TRUE	TRUE
Thimet oligopeptidase OS=Mus musculus GN=Thop1 PE=1 SV=1	Hspa14	THOP1_MOUSE	78 kDa			2														FALSE	FALSE	FALSE	FALSE	FALSE	FALSE
Heat shock 70 kDa protein 14 OS=Mus musculus GN=Hspa14 PE=2 SV=2	Mta2	HSP7E_MOUSE	55 kDa			2														FALSE	FALSE	FALSE	FALSE	FALSE	FALSE
Metastasis-associated protein MTA2 OS=Mus musculus GN=Mta2 PE=1 SV=1	Snx6	MTA2_MOUSE	75 kDa			2														FALSE	FALSE	FALSE	FALSE	FALSE	FALSE
Sorting nexin-6 OS=Mus musculus GN=Snx6 PE=1 SV=2	Slc12a2	SNX6_MOUSE	47 kDa						2											FALSE	FALSE	FALSE	FALSE	FALSE	FALSE
Solute carrier family 12 member 2 OS=Mus musculus GN=Slc12a2 PE=1 SV=2	Stam	S12A2_MOUSE	131 kDa			2														FALSE	FALSE	FALSE	FALSE	FALSE	FALSE
Signal transducing adapter molecule 1 OS=Mus musculus GN=Stam PE=2 SV=3	Pfn2	STAM1_MOUSE	60 kDa			2														FALSE	FALSE	FALSE	FALSE	FALSE	FALSE
Profilin-2 OS=Mus musculus GN=Pfn2 PE=1 SV=3	Eif6	PROF2_MOUSE	15 kDa			2														FALSE	FALSE	FALSE	FALSE	FALSE	TRUE
Eukaryotic translation initiation factor 6 OS=Mus musculus GN=Eif6 PE=1 SV=2	Naa11	IF6_MOUSE	27 kDa			2				2			1							FALSE	FALSE	FALSE	FALSE	FALSE	FALSE
N-alpha-acetyltransferase 11 OS=Mus musculus GN=Naa11 PE=2 SV=1	Clns1a	NAA11_MOUSE	25 kDa			2														FALSE	FALSE	FALSE	FALSE	FALSE	FALSE
Methylosome subunit pICln OS=Mus musculus GN=Clns1a PE=2 SV=1	Uba5	ICLN_MOUSE	26 kDa						2											FALSE	FALSE	FALSE	FALSE	FALSE	FALSE
Ubiquitin-like modifier-activating enzyme 5 OS=Mus musculus GN=Uba5 PE=2 SV=2	Psmb5	UBA5_MOUSE	45 kDa			2														FALSE	FALSE	FALSE	FALSE	FALSE	FALSE
Proteasome subunit beta type-5 OS=Mus musculus GN=Psmb5 PE=1 SV=3	Rab21	PSB5_MOUSE	29 kDa			3														FALSE	FALSE	FALSE	FALSE	FALSE	FALSE
Ras-related protein Rab-21 OS=Mus musculus GN=Rab21 PE=1 SV=4	Lrrn4	RAB21_MOUSE	24 kDa			2														FALSE	FALSE	FALSE	FALSE	FALSE	FALSE
Leucine-rich repeat neuronal protein 4 OS=Mus musculus GN=Lrrn4 PE=1 SV=2	Eif3g	LRRN4_MOUSE	80 kDa			2														FALSE	FALSE	FALSE	FALSE	FALSE	FALSE
Eukaryotic translation initiation factor 3 subunit G OS=Mus musculus GN=Eif3g PE=1 SV=2	Casp3	EIF3G_MOUSE	36 kDa			2														FALSE	FALSE	FALSE	FALSE	FALSE	FALSE
Caspase-3 OS=Mus musculus GN=Casp3 PE=1 SV=1	Pak1	CASP3_MOUSE	31 kDa						2											FALSE	FALSE	FALSE	FALSE	FALSE	FALSE
Serine/threonine-protein kinase PAK 1 OS=Mus musculus GN=Pak1 PE=1 SV=1	Cyfip2	PAK1_MOUSE	61 kDa			2														FALSE	FALSE	FALSE	FALSE	FALSE	TRUE
Cytoplasmic FMR1-interacting protein 2 OS=Mus musculus GN=Cyfip2 PE=1 SV=2	Tbx5	CYFP2_MOUSE	146 kDa			2														FALSE	FALSE	FALSE	FALSE	FALSE	FALSE
T-box transcription factor TBX5 OS=Mus musculus GN=Tbx5 PE=2 SV=2	Cfap74	TBX5_MOUSE	58 kDa			2														FALSE	FALSE	FALSE	FALSE	FALSE	FALSE
Cilia- and flagella-associated protein 74 OS=Mus musculus GN=Cfap74 PE=2 SV=3	Fam83h	CFA74_MOUSE	179 kDa			2														FALSE	FALSE	FALSE	FALSE	FALSE	FALSE
Protein FAM83H OS=Mus musculus GN=Fam83h PE=1 SV=1	Tfb1m	FA83H_MOUSE	131 kDa						2											FALSE	FALSE	FALSE	FALSE	FALSE	FALSE
Dimethyladenosine transferase 1, mitochondrial OS=Mus musculus GN=Tfb1m PE=1 SV=1	Parp1	TFB1M_MOUSE	39 kDa					2												FALSE	FALSE	FALSE	FALSE	FALSE	FALSE
Poly [ADP-ribose] polymerase 1 OS=Mus musculus GN=Parp1 PE=1 SV=3	Cers2	PARP1_MOUSE	113 kDa			2														FALSE	FALSE	FALSE	FALSE	FALSE	FALSE
Ceramide synthase 2 OS=Mus musculus GN=Cers2 PE=1 SV=1	Ubqln4	CERS2_MOUSE	45 kDa			2														FALSE	FALSE	FALSE	FALSE	FALSE	FALSE
Ubiquilin-4 OS=Mus musculus GN=Ubqln4 PE=1 SV=1	G6pdx	UBQL4_MOUSE	64 kDa			2														FALSE	FALSE	FALSE	FALSE	FALSE	FALSE
Glucose-6-phosphate 1-dehydrogenase X OS=Mus musculus GN=G6pdx PE=1 SV=3	Asna1	G6PD1_MOUSE	59 kDa			2														FALSE	FALSE	FALSE	FALSE	FALSE	FALSE
ATPase Asna1 OS=Mus musculus GN=Asna1 PE=1 SV=2	Ctbp1	ASNA_MOUSE	39 kDa			2														FALSE	FALSE	FALSE	FALSE	FALSE	FALSE
C-terminal-binding protein 1 OS=Mus musculus GN=Ctbp1 PE=1 SV=2	Sod1	CTBP1_MOUSE	48 kDa						2											FALSE	FALSE	FALSE	FALSE	FALSE	FALSE
Superoxide dismutase [Cu-Zn] OS=Mus musculus GN=Sod1 PE=1 SV=2	Ppp1r12a	SODC_MOUSE	16 kDa			2														FALSE	FALSE	FALSE	FALSE	FALSE	FALSE
Protein phosphatase 1 regulatory subunit 12A OS=Mus musculus GN=Ppp1r12a PE=1 SV=2	S100a14	MYPT1_MOUSE	115 kDa								2									FALSE	FALSE	FALSE	FALSE	FALSE	FALSE
Protein S100-A14 OS=Mus musculus GN=S100a14 PE=2 SV=1	Eif4b	S10AE_MOUSE	12 kDa					2												FALSE	FALSE	FALSE	FALSE	FALSE	FALSE
Eukaryotic translation initiation factor 4B OS=Mus musculus GN=Eif4b PE=1 SV=1	Ctnna3	IF4B_MOUSE	69 kDa			2														FALSE	FALSE	FALSE	FALSE	FALSE	FALSE
Catenin alpha-3 OS=Mus musculus GN=Ctnna3 PE=1 SV=2	Yars	CTNA3_MOUSE	100 kDa						2											FALSE	FALSE	FALSE	FALSE	FALSE	FALSE
Ig kappa chain V-V region MOPC 21 OS=Mus musculus PE=1 SV=1	Got1	KV5A2_MOUSE	15 kDa						2											FALSE	FALSE	FALSE	FALSE	FALSE	FALSE
Tyrosine--tRNA ligase, cytoplasmic OS=Mus musculus GN=Yars PE=2 SV=3	Hist1h2af	SYYC_MOUSE	59 kDa			2														FALSE	FALSE	FALSE	FALSE	FALSE	FALSE
Aspartate aminotransferase, cytoplasmic OS=Mus musculus GN=Got1 PE=1 SV=3	Hdac6	AATC_MOUSE	46 kDa						2											FALSE	FALSE	FALSE	FALSE	FALSE	FALSE
Histone H2A type 1-F OS=Mus musculus GN=Hist1h2af PE=1 SV=3	Ddah1	H2A1F_MOUSE	14 kDa		2															FALSE	FALSE	FALSE	FALSE	FALSE	FALSE
Histone deacetylase 6 OS=Mus musculus GN=Hdac6 PE=1 SV=3	Cavin1	HDAC6_MOUSE	126 kDa			2														FALSE	FALSE	FALSE	TRUE	FALSE	FALSE
N(G),N(G)-dimethylarginine dimethylaminohydrolase 1 OS=Mus musculus GN=Ddah1 PE=1 SV=3	Rpl26	DDAH1_MOUSE	31 kDa						2											FALSE	FALSE	FALSE	FALSE	FALSE	FALSE
Caveolae-associated protein 1 OS=Mus musculus OX=10090 GN=Cavin1 PE=1 SV=1	Kpna3	CAVN1_MOUSE	?							2										FALSE	FALSE	FALSE	FALSE	FALSE	FALSE
60S ribosomal protein L26 OS=Mus musculus GN=Rpl26 PE=1 SV=1	P2rx3	RL26_MOUSE	17 kDa							2										FALSE	FALSE	FALSE	FALSE	FALSE	FALSE
Importin subunit alpha-4 OS=Mus musculus GN=Kpna3 PE=1 SV=1	Acot13	IMA4_MOUSE	58 kDa			2														FALSE	FALSE	FALSE	FALSE	FALSE	FALSE
P2X purinoceptor 3 OS=Mus musculus GN=P2rx3 PE=2 SV=1	Grpel1	P2RX3_MOUSE	44 kDa							2										FALSE	FALSE	FALSE	FALSE	FALSE	FALSE
Acyl-coenzyme A thioesterase 13 OS=Mus musculus GN=Acot13 PE=1 SV=1	Dbnl	ACO13_MOUSE	15 kDa						2											FALSE	FALSE	FALSE	FALSE	FALSE	FALSE
GrpE protein homolog 1, mitochondrial OS=Mus musculus GN=Grpel1 PE=1 SV=1	Cnksr2	GRPE1_MOUSE	24 kDa			2														FALSE	FALSE	FALSE	FALSE	FALSE	FALSE
Drebrin-like protein OS=Mus musculus GN=Dbnl PE=1 SV=2	Chd9	DBNL_MOUSE	49 kDa			2														TRUE	FALSE	FALSE	FALSE	FALSE	FALSE
Connector enhancer of kinase suppressor of ras 2 OS=Mus musculus GN=Cnksr2 PE=1 SV=1		CNKR2_MOUSE	117 kDa							2										FALSE	FALSE	FALSE	FALSE	FALSE	FALSE
Chromodomain-helicase-DNA-binding protein 9 OS=Mus musculus GN=Chd9 PE=1 SV=2		CHD9_MOUSE	324 kDa						2											FALSE	FALSE	FALSE	FALSE	FALSE	FALSE
